# Supplementary material
Source: PubMed Central journal article supplement (PMC3734586)
Supplement: supp_M112.024075_mcp.M112.024075-3.pdf [file supp_M112.024075_mcp.M112.024075-3.pdf]

**Table S2 ; Students T-test of Tumour versus wound, most significantly differentially expressed genes**

| <b>Chick accession</b> | <b>STUDENT T-test Tumour versus Wound (adj. P-value)</b> | <b>Fold Change</b> | <b>Human ortholog gene</b> | <b>Human ortholog product</b>                                                          |
|------------------------|----------------------------------------------------------|--------------------|----------------------------|----------------------------------------------------------------------------------------|
| Q58I02_CHICK           | 2.87E-02                                                 | <b>53.32</b>       | NAMPT                      | nicotinamide phosphoribosyltransferase                                                 |
| O13256_CHICK           | 4.76E-03                                                 | <b>29.99</b>       | OAS3                       | 2'-5'-oligoadenylate synthetase 3, 100kDa                                              |
| E1C532_CHICK           | 6.18E-04                                                 | <b>28.13</b>       | POMGNT1                    | protein O-linked mannose beta1,2-N-acetylglucosaminyltransferase                       |
| PDIA3_CHICK            | 5.22E-03                                                 | <b>23.13</b>       | PDIA3                      | protein disulfide isomerase family A, member 3                                         |
| PSA7_CHICK             | 4.21E-02                                                 | <b>22.87</b>       | PSMA7                      | proteasome (prosome, macropain) subunit, alpha type, 7                                 |
| F1NSS0_CHICK           | 3.00E-02                                                 | <b>12.68</b>       | SPTB                       | spectrin, beta, erythrocytic                                                           |
| TAGL_CHICK             | 2.64E-02                                                 | <b>10.25</b>       | TAGLN                      | transgelin                                                                             |
| F1NYG4_CHICK           | 2.23E-03                                                 | <b>4.36</b>        | APOH                       | apolipoprotein H (beta-2-glycoprotein I)                                               |
| KPYK_CHICK             | 2.44E-02                                                 | <b>4.10</b>        | PKM2                       | pyruvate kinase, muscle                                                                |
| Q6T683_CHICK           | 2.34E-02                                                 | <b>3.77</b>        | ITGB5                      | integrin, beta 5                                                                       |
| E1BX43_CHICK           | 2.56E-02                                                 | <b>3.70</b>        | KNG1                       | kininogen 1                                                                            |
| F1NXT0_CHICK           | 5.36E-03                                                 | <b>3.63</b>        | VIM                        | vimentin                                                                               |
| F1DQG4_CHICK           | 2.38E-02                                                 | <b>3.59</b>        | C7                         | complement component 7                                                                 |
| Q5F4A4_CHICK           | 4.65E-03                                                 | <b>3.32</b>        | IMPDH2                     | IMP (inosine 5'-monophosphate) dehydrogenase 2                                         |
| F1NJI0_CHICK           | 2.96E-02                                                 | <b>3.22</b>        | ANXA5                      | annexin A5                                                                             |
| F1P0A2_CHICK           | 5.20E-04                                                 | <b>3.20</b>        | CTHRC1                     | collagen triple helix repeat containing 1                                              |
| ENPL_CHICK             | 9.26E-04                                                 | <b>3.00</b>        | HSP90B1                    | heat shock protein 90kDa beta (Grp94), member 1                                        |
| F1P1A5_CHICK           | 1.05E-02                                                 | <b>2.82</b>        | TKT                        | transketolase                                                                          |
| F1NS72_CHICK           | 4.73E-02                                                 | <b>2.70</b>        | PPP2R2B                    | protein phosphatase 2, regulatory subunit B, beta                                      |
| AMP1_CHICK             | 4.32E-02                                                 | <b>2.66</b>        | P80389                     | chick only                                                                             |
| E1C1G2_CHICK           | 1.95E-02                                                 | <b>2.62</b>        | AFP                        | alpha-fetoprotein                                                                      |
| Q5ZHM4_CHICK           | 3.71E-03                                                 | <b>2.56</b>        | VNN2                       | vanin 2                                                                                |
| E1C8R2_CHICK           | 4.80E-02                                                 | <b>2.49</b>        | MSLN                       | mesothelin                                                                             |
| PGAM1_CHICK            | 3.44E-02                                                 | <b>2.42</b>        | PGAM1                      | phosphoglycerate mutase 1 (brain)                                                      |
| MMP2_CHICK             | 8.44E-04                                                 | <b>2.41</b>        | MMP2                       | matrix metalloproteinase 2 (gelatinase A, 72kDa gelatinase, 72kDa type IV collagenase) |

|                                            |          |      |           |                                                                                      |
|--------------------------------------------|----------|------|-----------|--------------------------------------------------------------------------------------|
| E1BUA6_CHICK                               | 8.92E-03 | 2.37 | VNN1      | vanin 1                                                                              |
| FA9_CHICK                                  | 2.11E-02 | 2.37 | F9        | coagulation factor IX                                                                |
| F1NPN3_CHICK                               | 4.94E-02 | 2.36 | SERPINA10 | serpin peptidase inhibitor, clade A (alpha-1 antiproteinase, antitrypsin), member 10 |
| A6N9E0_CHICK                               | 9.38E-03 | 2.27 | C3        | complement component 3                                                               |
| ACTN1_CHICK                                | 1.66E-02 | 2.25 | ACTN1     | actinin, alpha 1                                                                     |
| Q4ADG4_CHICK<br>Q4ADJ7_CHICK<br>TRFE_CHICK | 4.54E-02 | 2.24 | LTF       | lactotransferrin                                                                     |
| F1NDH2_CHICK                               | 1.14E-02 | 2.20 | AGT       | angiotensinogen (serpin peptidase inhibitor, clade A, member 8)                      |
| E1BS56_CHICK                               | 4.75E-02 | 2.17 | SERPINA1  | serpin peptidase inhibitor, clade A (alpha-1 antiproteinase, antitrypsin), member 1  |
| E1BS66_CHICK                               | 4.04E-02 | 2.17 | TF        | transferrin                                                                          |
| F1NK40_CHICK                               | 3.61E-02 | 2.15 | A2ML1     | alpha-2-macroglobulin-like 1                                                         |
| F1NXV6_CHICK                               | 3.19E-02 | 2.15 | F2        | coagulation factor II (thrombin)                                                     |
| CFBL_CHICK                                 | 3.76E-02 | 2.11 | CFB       | complement factor B                                                                  |
| Q5ZLB3_CHICK                               | 2.96E-02 | 2.10 | HNRNPA1   | heterogeneous nuclear ribonucleoprotein A1                                           |
| APOA1_CHICK                                | 1.11E-02 | 2.09 | APOA1     | apolipoprotein A-I                                                                   |
| AT1B1_CHICK/<br>F1NSV6                     | 1.27E-02 | 2.04 | ATP1B1    | ATPase, Na <sup>+</sup> /K <sup>+</sup> transporting, beta 1 polypeptide             |
| E1BRP7_CHICK                               | 2.11E-03 | 2.05 | ENG       | endoglin                                                                             |
| ITA6_CHICK                                 | 1.97E-02 | 2.07 | ITGA6     | integrin, alpha 6                                                                    |
| F1NNE4_CHICK                               | 3.95E-02 | 2.08 | C6orf191  | chromosome 6 open reading frame 191                                                  |
| EF1A_CHICK                                 | 8.35E-03 | 2.11 | EEF1A1    | eukaryotic translation elongation factor 1 alpha 1                                   |
| F1NZ25_CHICK                               | 4.45E-02 | 2.12 | EIF3B     | eukaryotic translation initiation factor 3, subunit B                                |
| F1NYN0_CHICK                               | 1.53E-02 | 2.12 | NCAM1     | neural cell adhesion molecule 1                                                      |
| CO6A2_CHICK                                | 3.69E-02 | 2.15 | COL6A2    | collagen, type VI, alpha 2                                                           |
| Q9I8D6_CHICK                               | 3.75E-02 | 2.15 | CCT4      | chaperonin containing TCP1, subunit 4 (delta)                                        |
| F1NRP6_CHICK                               | 4.84E-02 | 2.19 | FAM171A1  | family with sequence similarity 171, member A1                                       |
| E1BXC2_CHICK                               | 7.61E-03 | 2.19 | ESD       | esterase D                                                                           |
| Q98922_CHICK                               | 1.51E-02 | 2.20 | MCAM      | melanoma cell adhesion molecule                                                      |

|                   |          |              |          |                                                                                                             |
|-------------------|----------|--------------|----------|-------------------------------------------------------------------------------------------------------------|
| E1C5B0_CHICK      | 9.16E-03 | <b>2.22</b>  | C2CD3    | C2 calcium-dependent domain containing 3                                                                    |
| Q5QQ39_CHICK      | 6.46E-03 | <b>2.30</b>  | ST3GAL4  | ST3 beta-galactoside alpha-2,3-sialyltransferase 4                                                          |
| CO1A1_CHICK       | 9.43E-03 | <b>2.30</b>  | COL1A1   | collagen, type I, alpha 1                                                                                   |
| F1NCR0_CHICK      | 7.05E-03 | <b>2.33</b>  | COL1A2   | collagen, type I, alpha 2                                                                                   |
| O42094_CHICK      | 4.60E-03 | <b>2.39</b>  | ITGA1    | integrin, alpha 1                                                                                           |
| <b>K2CO_CHICK</b> | 7.64E-03 | <b>2.39</b>  | KRT75    | keratin 75                                                                                                  |
| F1P2R3_CHICK      | 1.34E-02 | <b>2.40</b>  | COL4A1   | collagen, type IV, alpha 1                                                                                  |
| E1BST4_CHICK      | 4.18E-02 | <b>2.47</b>  | PLXNB2   | plexin B2                                                                                                   |
| SDOS_CHICK        | 9.83E-03 | <b>2.53</b>  | NUDT16L1 | nudix (nucleoside diphosphate linked moiety X)-type motif 16-like 1                                         |
| F1NWM8_CHICK      | 4.25E-02 | <b>2.64</b>  | PTPRM    | protein tyrosine phosphatase, receptor type, M                                                              |
| THIO_CHICK        | 4.11E-02 | <b>2.74</b>  | TXN      | thioredoxin                                                                                                 |
| E1C1V5_CHICK      | 4.14E-02 | <b>2.74</b>  | NPR3     | natriuretic peptide receptor C/guanylate cyclase C (atrionatriuretic peptide receptor C)                    |
| O12945_CHICK      | 7.92E-05 | <b>2.79</b>  | VTN      | vitronectin                                                                                                 |
| F1P3X7_CHICK      | 1.69E-02 | <b>2.89</b>  | ESAM     | endothelial cell adhesion molecule                                                                          |
| Q5ZKP8_CHICK      | 2.82E-03 | <b>3.29</b>  | KARS     | lysyl-tRNA synthetase                                                                                       |
| LMNA_CHICK        | 2.67E-03 | <b>3.42</b>  | LMNA     | lamin A/C                                                                                                   |
| E1BRY5_CHICK      | 1.20E-02 | <b>3.52</b>  | NEU2     | sialidase 2 (cytosolic sialidase)                                                                           |
| E1C073_CHICK      | 1.54E-02 | <b>3.76</b>  | EIF5     | eukaryotic translation initiation factor 5                                                                  |
| F1P2Y9_CHICK      | 2.47E-02 | <b>5.02</b>  | SPINT1   | serine peptidase inhibitor, Kunitz type 1                                                                   |
| CAH2_CHICK        | 4.51E-02 | <b>5.02</b>  | CA2      | carbonic anhydrase II                                                                                       |
| Q8AWB7_CHICK      | 1.74E-03 | <b>6.68</b>  | SMC1A    | structural maintenance of chromosomes 1A                                                                    |
| K                 |          |              |          |                                                                                                             |
| F1NLS1_CHICK      | 1.85E-02 | <b>10.87</b> | MRC1     | macrophage mannose receptor 1-like                                                                          |
| Q6WJ01_CHICK      | 1.59E-03 | <b>11.49</b> | FZD2     | frizzled family receptor 2                                                                                  |
| E1BVX6_CHICK      | 4.41E-02 | <b>13.73</b> | CPT1A    | carnitine palmitoyltransferase 1A (liver)                                                                   |
| B3AT_CHICK        | 3.98E-02 | <b>17.90</b> | SLC4A1   | solute carrier family 4, anion exchanger, member 1 (erythrocyte membrane protein band 3, Diego blood group) |
| F1NNL8_CHICK      | 2.13E-02 | <b>21.17</b> | TSPO     | translocator protein (18kDa)                                                                                |
| Q5ZHV4_CHICK      | 2.63E-02 | <b>31.77</b> | BPGM     | 2,3-bisphosphoglycerate mutase                                                                              |

---

|                     |          |               |        |                                                                     |
|---------------------|----------|---------------|--------|---------------------------------------------------------------------|
| <b>F1NJR5_CHICK</b> | 2.14E-02 | <b>32.03</b>  | ANK1   | ankyrin 1, erythrocytic                                             |
| <b>F1NLW8_CHICK</b> | 8.78E-03 | <b>41.31</b>  | EPB41  | erythrocyte membrane protein band 4.1 (elliptocytosis 1, RH-linked) |
| <b>E1BQZ4_CHICK</b> | 1.78E-02 | <b>60.57</b>  | EPB42  | erythrocyte membrane protein band 4.2                               |
| <b>H5_CHICK</b>     | 2.94E-02 | <b>63.06</b>  | H1FO   | H1 histone family, member 0                                         |
| <b>C5HV42_CHICK</b> | 2.34E-02 | <b>103.55</b> | CALCRL | calcitonin receptor-like                                            |

---
