# Supplementary material
Source: PubMed Central journal article supplement (PMC3734586)
Supplement: supp_M112.024075_mcp.M112.024075-5.pdf [file supp_M112.024075_mcp.M112.024075-5.pdf]

### CAM specific proteins

| AC           | Human ortholog gene | Human ortholog product                                                     |
|--------------|---------------------|----------------------------------------------------------------------------|
| F1NCP9_CHICK | NUCB2               | nucleobindin 2                                                             |
| F1P5H6_CHICK | LYG2                | lysozyme G-like 2                                                          |
| F1NXM7_CHICK | PSCA                | prostate stem cell antigen                                                 |
| E1BRY5_CHICK | NEU2                | sialidase 2 (cytosolic sialidase)                                          |
| F1NZW7_CHICK | PPIC                | peptidylprolyl isomerase C (cyclophilin C)                                 |
| PA1B2_CHICK  | PAFAH1B2            | platelet-activating factor acetylhydrolase 1b, catalytic subunit 2 (30kDa) |
| ZP3_CHICK    | ZP3                 | zona pellucida glycoprotein 3 (sperm receptor)                             |
| S10AB_CHICK  | S100A11             | S100 calcium binding protein A11                                           |
| E1BUB6_CHICK | GSTT1               | glutathione S-transferase theta 1                                          |
| DEST_CHICK   | DSTN                | destrin (actin depolymerizing factor)                                      |
| Q5ZKU6_CHICK | CNN2                | calponin 2                                                                 |
| F1NWT2_CHICK | FAT2                | FAT tumor suppressor homolog 2 (Drosophila)                                |
| F1NCY6_CHICK | TNFRSF6B            | tumor necrosis factor receptor superfamily, member 6b, decoy               |
| F1NTK2_CHICK | A2ML1               | alpha-2-macroglobulin-like 1                                               |
| F4YMA7_CHICK | JUP                 | junction plakoglobin                                                       |

### Intestine specific proteins

| AC           | Human ortholog gene | Human ortholog product                                      |
|--------------|---------------------|-------------------------------------------------------------|
| E1C8U7_CHICK | KIAA1731            | KIAA1731                                                    |
| F1P039_CHICK | CAV1                | caveolin 1, caveolae protein, 22kDa                         |
| E1BWU4_CHICK | NTNG1               | netrin G1                                                   |
| E1BRI1_CHICK | GPLD1               | glycosylphosphatidylinositol specific phospholipase D1      |
| E1C906_CHICK | MYLK                | myosin light chain kinase                                   |
| F1NXF9_CHICK | MEGF6               | multiple EGF-like-domains 6                                 |
| MDGA1_CHICK  | MDGA1               | MAM domain containing glycosylphosphatidylinositol anchor 1 |
| F1NDL8_CHICK | CNTNAP2             | contactin associated protein-like 2                         |
| F1NPJ1_CHICK | TNR                 | tenascin R (restrictin, janusin)                            |
| E1C728_CHICK | LRIG1               | leucine-rich repeats and immunoglobulin-like domains 1      |
| F1NTX8_CHICK | GPA33               | glycoprotein A33 (transmembrane)                            |

### Kidney specific proteins

| AC           | Human ortholog gene | Human ortholog product                                 |
|--------------|---------------------|--------------------------------------------------------|
| F1NVE6_CHICK | ANO4                | anoctamin 4                                            |
| F1ND49_CHICK | CNNM2               | cyclin M2                                              |
| F1NA41_CHICK | FAAH                | fatty acid amide hydrolase                             |
| F1P3N1_CHICK | CRB2                | crumbs homolog 2 (Drosophila)                          |
| E1C3D2_CHICK | SEPT2               | septin 2                                               |
| F1N9U7_CHICK | DBH                 | dopamine beta-hydroxylase (dopamine beta-monoxygenase) |
| F1N871_CHICK | FLT4                | fms-related tyrosine kinase 4                          |
| F1P092_CHICK | RIMS2               | regulating synaptic membrane exocytosis 2              |

## Liver specific proteins

| AC           | Human ortholog gene | Human ortholog product                                                      |
|--------------|---------------------|-----------------------------------------------------------------------------|
| Q7ZZZ5_CHICK | FABP2               | fatty acid binding protein 2, intestinal                                    |
| F1NVJ0_CHICK | HPD                 | 4-hydroxyphenylpyruvate dioxygenase                                         |
| Q7ZZK3_CHICK | PYGL                | phosphorylase, glycogen, liver                                              |
| F1N8L5_CHICK | DYNLL1              | dynein, light chain, LC8-type 1                                             |
| AATC_CHICK   | GOT1                | glutamic-oxaloacetic transaminase 1, soluble (aspartate aminotransferase 1) |
| PPAC_CHICK   | ACP1                | acid phosphatase 1, soluble                                                 |
| E1BYW3_CHICK | NQO1                | NAD(P)H dehydrogenase, quinone 1                                            |
| F1N9S2_CHICK | GSTZ1               | glutathione transferase zeta 1                                              |
| GSTA3_CHICK  | GSTA1               | glutathione S-transferase alpha 1                                           |
