# Supplementary material
Source: PubMed Central journal article supplement (PMC3734586)
Supplement: supp_M112.024075_mcp.M112.024075-6.pdf [file supp_M112.024075_mcp.M112.024075-6.pdf]

## Supplementary table S5; Tumour sample peptides and matches to Swissprot/Trembl database

| Unique peptide                            | What species | Proteins peptide is found in human | Proteins peptide is found in chicken | how many genes | Gene | No. peptides matched gene |
|-------------------------------------------|--------------|------------------------------------|--------------------------------------|----------------|------|---------------------------|
| AEAESLYQSK                                | Just human   | P04264,                            |                                      | 1              | KRT1 | 24                        |
| DYQELMNTK                                 | Just human   | P04264,                            |                                      | 1              | KRT1 | 24                        |
| FLEQQNQVLQTKWELLQQVDTS<br>TR              | Just human   | P04264,                            |                                      | 1              | KRT1 | 24                        |
| FSSCGGGGSGFAGGGFGSR                       | Just human   | P04264,                            |                                      | 1              | KRT1 | 24                        |
| GGGGGGYSGSGSSYSGGGGSYG<br>SGGGGGGGR       | Just human   | P04264,                            |                                      | 1              | KRT1 | 24                        |
| GSYSGSGSSYSGGGSYSGGGG<br>GGHGYSYSGSSSGGYR | Just human   | P04264,                            |                                      | 1              | KRT1 | 24                        |
| LALDLEIATYR                               | Just human   | P04264,                            |                                      | 1              | KRT1 | 24                        |
| LNDLEDALQQAK                              | Just human   | P04264,                            |                                      | 1              | KRT1 | 24                        |
| NKLNDLEDALQQAK                            | Just human   | P04264,                            |                                      | 1              | KRT1 | 24                        |
| QISNLQQSISDAEQR                           | Just human   | P04264,                            |                                      | 1              | KRT1 | 24                        |
| SGGGFSSGSAGIINYQR                         | Just human   | P04264,                            |                                      | 1              | KRT1 | 24                        |
| SKAEAESLYQSK                              | Just human   | P04264,                            |                                      | 1              | KRT1 | 24                        |
| SKAEAESLYQSKYEELQITAGR                    | Just human   | P04264,                            |                                      | 1              | KRT1 | 24                        |
| SLDLSIIAEVK                               | Just human   | P04264,                            |                                      | 1              | KRT1 | 24                        |
| SLDLSIIAEVKAQYEDIAQK                      | Just human   | P04264,                            |                                      | 1              | KRT1 | 24                        |
| SLNNQFASFDK                               | Just human   | P04264,                            |                                      | 1              | KRT1 | 24                        |
| SLNNQFASFDKVR                             | Just human   | P04264,                            |                                      | 1              | KRT1 | 24                        |
| THNLEPYFESFINNLR                          | Just human   | P04264,                            |                                      | 1              | KRT1 | 24                        |
| TNAENEFVTIK                               | Just human   | P04264,                            |                                      | 1              | KRT1 | 24                        |
| TNAENEFVTIKK                              | Just human   | P04264,                            |                                      | 1              | KRT1 | 24                        |

|                                                      |            |         |   |       |    |
|------------------------------------------------------|------------|---------|---|-------|----|
| <b>WELLQQVDTSTR</b>                                  | Just human | P04264, | 1 | KRT1  | 24 |
| <b>ADLEMQIESLTEELAYLK</b>                            | Just human | P13645, | 1 | KRT10 | 18 |
| <b>ADLEMQIESLTEELAYLKK</b>                           | Just human | P13645, | 1 | KRT10 | 18 |
| <b>AETECQNTEYQQLLDIK</b>                             | Just human | P13645, | 1 | KRT10 | 18 |
| <b>ALEESNYELEGK</b>                                  | Just human | P13645, | 1 | KRT10 | 18 |
| <b>ELTTEIDNNIEQISSYK</b>                             | Just human | P13645, | 1 | KRT10 | 18 |
| <b>GSLGGGFSSGGFSGGSFSR</b>                           | Just human | P13645, | 1 | KRT10 | 18 |
| <b>IRLENEIQTYR</b>                                   | Just human | P13645, | 1 | KRT10 | 18 |
| <b>LENEIQTYR</b>                                     | Just human | P13645, | 1 | KRT10 | 18 |
| <b>NQILNLTDDNANILLQIDNAR</b>                         | Just human | P13645, | 1 | KRT10 | 18 |
| <b>NVQALEIELQSQLALK</b>                              | Just human | P13645, | 1 | KRT10 | 18 |
| <b>NVSTGDVNVEMNAAPGVDLTQL<br/>LNNMR</b>              | Just human | P13645, | 1 | KRT10 | 18 |
| <b>QSLEASLAETEGR</b>                                 | Just human | P13645, | 1 | KRT10 | 18 |
| <b>SLLEGGSSGGGGR</b>                                 | Just human | P13645, | 1 | KRT10 | 18 |
| <b>SQYEQLAEQNR</b>                                   | Just human | P13645, | 1 | KRT10 | 18 |
| <b>SQYEQLAEQNRK</b>                                  | Just human | P13645, | 1 | KRT10 | 18 |
| <b>VLDELTLTK</b>                                     | Just human | P13645, | 1 | KRT10 | 18 |
| <b>DIENQYETQITQIEHEVSSSGQEV<br/>QSSAK</b>            | Just human | P35527, | 1 | KRT9  | 16 |
| <b>EIETYHNLLEGGQEDFESSGAGK</b>                       | Just human | P35527, | 1 | KRT9  | 16 |
| <b>FSSSSGYGGGSSR</b>                                 | Just human | P35527, | 1 | KRT9  | 16 |
| <b>GGGGSGFGYSYGGGSGGGFSASSL<br/>GGGFGGSSR</b>        | Just human | P35527, | 1 | KRT9  | 16 |
| <b>GGSGGSHGGGSGFGGESGGSYG<br/>GGEEASGSGGGYGGGSGK</b> | Just human | P35527, | 1 | KRT9  | 16 |
| <b>GGSGGSGYGGGSGGGYGGGSGS<br/>R</b>                  | Just human | P35527, | 1 | KRT9  | 16 |
| <b>HGVQELEIELQSQLSK</b>                              | Just human | P35527, | 1 | KRT9  | 16 |

|                                                      |            |                                                       |   |      |    |
|------------------------------------------------------|------------|-------------------------------------------------------|---|------|----|
| <b>LASYLDKVQALEEANNDLENK</b>                         | Just human | P35527,                                               | 1 | KRT9 | 16 |
| <b>QEYEQLIAK</b>                                     | Just human | P35527,                                               | 1 | KRT9 | 16 |
| <b>QGVADADINGLR</b>                                  | Just human | P35527,                                               | 1 | KRT9 | 16 |
| <b>QVLDNLTMEK</b>                                    | Just human | P35527,                                               | 1 | KRT9 | 16 |
| <b>SDLEMQYETLQEELMALK</b>                            | Just human | P35527,                                               | 1 | KRT9 | 16 |
| <b>SGGGGGGGLSGGSIR</b>                               | Just human | P35527,                                               | 1 | KRT9 | 16 |
| <b>STMQELNSR</b>                                     | Just human | P35527,                                               | 1 | KRT9 | 16 |
| <b>TLNDRMRQEYEQLIAK</b>                              | Just human | P35527,                                               | 1 | KRT9 | 16 |
| <b>VQALEEANNDLENK</b>                                | Just human | P35527,                                               | 1 | KRT9 | 16 |
| <b>FGGGGGPGGVLGGPGGFGPG<br/>GYPGGIHEVSVNQSLQLNVK</b> | Just human | P35908,                                               | 1 | KRT2 | 12 |
| <b>GFSSGSAVVSGGSR</b>                                | Just human | P35908,                                               | 1 | KRT2 | 12 |
| <b>HGGGGGGFGGGGFGSR</b>                              | Just human | P35908,                                               | 1 | KRT2 | 12 |
| <b>LQGEIAHVK</b>                                     | Just human | P35908,                                               | 1 | KRT2 | 12 |
| <b>NVQDAIADAEQR</b>                                  | Just human | P35908,                                               | 1 | KRT2 | 12 |
| <b>TAAENDFVTLK</b>                                   | Just human | P35908,                                               | 1 | KRT2 | 12 |
| <b>TAAENDFVTLKK</b>                                  | Just human | P35908,                                               | 1 | KRT2 | 12 |
| <b>VDLLNQEIEFLK</b>                                  | Just human | P35908,                                               | 1 | KRT2 | 12 |
| <b>YEELQVTVGR</b>                                    | Just human | P35908,                                               | 1 | KRT2 | 12 |
| <b>AMGEQAVALAR</b>                                   | Just human | B4DPF9,C9JPQ8,B2RDE0,P05165,                          | 1 | PCCA | 9  |
| <b>FLSDVYPDGFK</b>                                   | Just human | B4DPF9,Q5JTW6,C9JPQ8,P05165,Q5JTW5,                   | 1 | PCCA | 9  |
| <b>GVTHNIALLR</b>                                    | Just human | B4DPF9,Q5JTW6,C9JPQ8,B2RDE0,P05165,Q5JTW5,            | 1 | PCCA | 9  |
| <b>LSSQEAASSFGDDR</b>                                | Just human | B4DPF9,C9JPQ8,B2RDE0,P05165,                          | 1 | PCCA | 9  |
| <b>MADALDNYVIR</b>                                   | Just human | B4DPF9,C9JPQ8,B2RDE0,P05165,Q5JTW5,                   | 1 | PCCA | 9  |
| <b>MPVIKPDIANWELSVK</b>                              | Just human | Q16380,B4DPF9,Q5JTW6,C9JPQ8,B2RDE0,P05165,Q5JTW<br>4, | 1 | PCCA | 9  |
| <b>TVAIHSDVDASSVHVK</b>                              | Just human | B4DPF9,C9JPQ8,B2RDE0,P05165,                          | 1 | PCCA | 9  |
| <b>VTEDTSSVLR</b>                                    | Just human | Q5JVH2,B2RDE0,P05165,E9PCJ1,                          | 1 | PCCA | 9  |
| <b>VVEEAPSIFLDAETR</b>                               | Just human | B4DPF9,C9JPQ8,B2RDE0,P05165,                          | 1 | PCCA | 9  |

|                               |            |                                                                        |   |       |   |
|-------------------------------|------------|------------------------------------------------------------------------|---|-------|---|
| <b>IISNASCTTNCLAPLAK</b>      | Just human | Q2TSD0,Q0QET7,A4UCT1,E7EUT4,P04406,E7EUT5,B4DRV9,E7EU54,               | 1 | GAPDH | 7 |
| <b>LISWYDNEFGYSNR</b>         | Just human | E7EPW1,Q2TSD0,E7EUT4,P04406,E7EUT5,                                    | 1 | GAPDH | 7 |
| <b>LVINGNPITIFQER</b>         | Just human | Q2TSD0,Q0QET7,E7EUT4,P04406,B4DRV9,E7EU54,                             | 1 | GAPDH | 7 |
| <b>VPTANVSVVDLTCR</b>         | Just human | E7EPW1,Q2TSD0,Q0QET7,A4UCT1,Q5ZEY3,E7EUT4,P04406,E7EUT5,               | 1 | GAPDH | 7 |
| <b>VVDLMAHMASK</b>            | Just human | E7EPW1,Q2TSD0,E7EUT4,P04406,E7EUT5,Q16768,                             | 1 | GAPDH | 7 |
| <b>VVDLMAHMASKE</b>           | Just human | E7EPW1,Q2TSD0,E7EUT4,P04406,E7EUT5,Q16768,                             | 1 | GAPDH | 7 |
| <b>WGDAGAEYVVESTGVFTTMEK</b>  | Just human | Q2TSD0,Q0QET7,E7EUT4,P04406,E7EUT5,B4DRV9,E7EU54,                      | 1 | GAPDH | 7 |
| <b>AGKPVICATQMLESMIK</b>      | Just human | E7EUQ8,B4DNK4,P14618,E9PF79,E7EUJ4,Q504U3,Q8WUW7,B4DUU6,B4DRT3,        | 1 | PKM2  | 7 |
| <b>FGVEQDQDMVFASFIR</b>       | Just human | E7EUQ8,B4DNK4,P14618,E9PF79,E7EUJ4,Q504U3,Q8WUW7,B4DUU6,B4DRT3,        | 1 | PKM2  | 7 |
| <b>ITLDNAYMEK</b>             | Just human | E7EUQ8,B4DNK4,P14618,E9PF79,B4DUU6,B4DRT3,                             | 1 | PKM2  | 7 |
| <b>IYVDDGLISLQVK</b>          | Just human | E7EUQ8,B4DNK4,P14618,E9PF79,B4DUU6,B4DRT3,                             | 1 | PKM2  | 7 |
| <b>LAPITSDPTEATAVGAVEASFK</b> | Just human | B4DNK4,P14618,Q9UK31,E9PF79,Q9UKK4,Q8WUW7,B4DUU6,                      | 1 | PKM2  | 7 |
| <b>LDIDSPITAR</b>             | Just human | E7EUQ8,B4DNK4,P14618,E9PF79,B4DRT3,                                    | 1 | PKM2  | 7 |
| <b>RFDEILEASDGIMVAR</b>       | Just human | E7EUQ8,B4DNK4,P14618,E9PF79,E7EUJ4,Q504U3,Q8WUW7,B4DUU6,B4DRT3,        | 1 | PKM2  | 7 |
| <b>EEAENTLQSFR</b>            | Just human | P08670,B0YJC5,Q53HU8,B3KRK8,F5H288,B0YJC4,Q5JVS8,                      | 1 | VIM   | 7 |
| <b>ETNLDLPLVDTHSK</b>         | Just human | P08670,Q53HU8,                                                         | 1 | VIM   | 7 |
| <b>ILLAELEQLKGQGK</b>         | Just human | P08670,Q53HU8,B3KRK8,F5H288,B0YJC4,                                    | 1 | VIM   | 7 |
| <b>KVESLQEEIAFLK</b>          | Just human | P08670,B0YJC5,B3KRK8,F5H288,B0YJC4,Q5JVS8,                             | 1 | VIM   | 7 |
| <b>KVESLQEEIAFLKK</b>         | Just human | P08670,B0YJC5,B3KRK8,F5H288,B0YJC4,Q5JVS8,                             | 1 | VIM   | 7 |
| <b>QVQSLTCEVDALK</b>          | Just human | P08670,B0YJC5,Q53HU8,B3KRK8,F5H288,B0YJC4,Q5JVS8,                      | 1 | VIM   | 7 |
| <b>SLYASSPGGVYATR</b>         | Just human | P08670,Q53HU8,B3KRK8,F5H288,B0YJC4,                                    | 1 | VIM   | 7 |
| <b>ALVLIAFAQYLQCPFEDHVK</b>   | Just human | A6NBZ8,E7ESU5,B2RBS8,Q8IUK7,B4DPR2,F6KPG5,A8K9P0,P02768,Q56G89,B4DPP6, | 1 | ALB   | 6 |

|                                 |            |                                                                                              |   |       |   |
|---------------------------------|------------|----------------------------------------------------------------------------------------------|---|-------|---|
| <b>CTESLVNR</b>                 | Just human | A6NBZ8,E7ESU5,C9JKR2,B2RBS8,B7WNR0,Q8IUUK7,B4DPR2,D6RHD5,F6KPG5,A8K9P0,P02768,B4DPP6,        | 1 | ALB   | 6 |
| <b>FQNALLVR</b>                 | Just human | A6NBZ8,E7ESU5,C9JKR2,B2RBS8,B7WNR0,Q8IUUK7,B4DPR2,D6RHD5,F6KPG5,A8K9P0,P02768,Q56G89,B4DPP6, | 1 | ALB   | 6 |
| <b>KVPQVSTPTLVEVSR</b>          | Just human | A6NBZ8,E7ESU5,C9JKR2,B2RBS8,B7WNR0,Q8IUUK7,B4DPR2,D6RHD5,F6KPG5,A8K9P0,P02768,Q56G89,B4DPP6, | 1 | ALB   | 6 |
| <b>QNCLEFEQLGEYK</b>            | Just human | A6NBZ8,E7ESU5,C9JKR2,B2RBS8,B7WNR0,Q8IUUK7,B4DPR2,D6RHD5,F6KPG5,A8K9P0,P02768,Q56G89,B4DPP6, | 1 | ALB   | 6 |
| <b>RHPDYSVVLLLR</b>             | Just human | A6NBZ8,E7ESU5,C9JKR2,B7WNR0,B4DPR2,D6RHD5,F6KPG5,A8K9P0,P02768,Q56G89,B4DPP6,                | 1 | ALB   | 6 |
| <b>AEAEAQAEELSFPR</b>           | Just human | P11498,E9PS68,                                                                               | 1 | PC    | 5 |
| <b>DFTATFGPLDSLINTR</b>         | Just human | P11498,E9PS68,                                                                               | 1 | PC    | 5 |
| <b>GTPLDTEVPMER</b>             | Just human | P11498,                                                                                      | 1 | PC    | 5 |
| <b>VEGRPGASLPPLDLQALEK</b>      | Just human | P11498,E9PS68,                                                                               | 1 | PC    | 5 |
| <b>VFDYSEYWEGAR</b>             | Just human | P11498,                                                                                      | 1 | PC    | 5 |
| <b>FTASAGIQVVGDDTLVTNPK</b>     | Just human | E2DRY6,P06733,Q96GV1,Q9BT62,A4QMW8,                                                          | 1 | ENO1  | 4 |
| <b>GNPTVEVDLFTSK</b>            | Just human | P06733,                                                                                      | 1 | ENO1  | 4 |
| <b>LAMQEFMILPVGAANFR</b>        | Just human | E2DRY6,P06733,Q9BT62,A4UCS8,                                                                 | 1 | ENO1  | 4 |
| <b>LMIEMDG TENK</b>             | Just human | P06733,A4UCS8,                                                                               | 1 | ENO1  | 4 |
| <b>GILAADESTGSIK</b>            | Just human | P04075,                                                                                      | 1 | ALDOA | 3 |
| <b>IGEHTPSALAIMENANVLAR</b>     | Just human | P04075,A4UCT0,A4UCS9,                                                                        | 1 | ALDOA | 3 |
| <b>QLLLTADDR</b>                | Just human | P04075,                                                                                      | 1 | ALDOA | 3 |
| <b>ETSGNLEQLLAVVK</b>           | Just human | E7ENQ5,D6RBL5,D6RBE9,P08758,                                                                 | 1 | ANXA5 | 3 |
| <b>GLGTDEESILTLTSTR</b>         | Just human | E7ENQ5,P08758,B4DNG6,E9PHT9,                                                                 | 1 | ANXA5 | 3 |
| <b>SEIDLFNIR</b>                | Just human | D6RBL5,D6RBE9,P08758,                                                                        | 1 | ANXA5 | 3 |
| <b>DLQFVEVTDVK</b>              | Just human | P02751,E9PE77,F8W7G7,E7ERA1,B7ZLF0,B7ZLE5,Q6MZM7,Q6MZF4,                                     | 1 | FN1   | 3 |
| <b>FGFCPMAAHEEICTTNEGVMYR</b>   | Just human | P02751,E9PE77,F8W7G7,E9PG29,E7ERA1,Q7Z391,B7ZLF0,B7ZLE5,Q564H7,Q6MZM7,Q6MZF4,                | 1 | FN1   | 3 |
| <b>TGLDSPTGIDFSDITANSFTVHWI</b> | Just human | P02751,E9PE77,F8W7G7,B4DU16,B7ZLF0,B7ZLE5,Q6N08                                              | 1 | FN1   | 3 |

|                             |            |                                                                                                                  |   |            |   |
|-----------------------------|------------|------------------------------------------------------------------------------------------------------------------|---|------------|---|
| <b>APR</b>                  |            | 4,Q59G22,Q68CX6,Q6MZM7,Q5CZ99,                                                                                   |   |            |   |
| <b>APSTYGGGLSVSSSR</b>      | Just human | P02533,                                                                                                          | 1 | KRT14      | 3 |
| <b>ISISTSGGSFR</b>          | Just human | P13647,F8VV57,                                                                                                   | 1 | KRT5       | 3 |
| <b>LAELEEALQK</b>           | Just human | P13647,E7EU87,B4E1T1,B4DL32,                                                                                     | 1 | KRT5       | 3 |
| <b>DLADELALVDVIEDK</b>      | Just human | F5GYU2,F5GXY2,F5H6W8,P00338,F5H5J4,F5GXH2,A8MXQ4,F8W819,B4DKQ2,F5GZQ4,                                           | 1 | LDHA       | 3 |
| <b>ITVVGVGAVGMACAISILMK</b> | Just human | F5GYU2,E9PH51,F5GXC7,F5GXY2,F5H6W8,P00338,F5H308,F5H5J4,F5GXH2,A8MXQ4,F5GWW2,F8W819,B4DKQ2,F5GZQ4,B4DJI1,F5H8H6, | 1 | LDHA       | 3 |
| <b>VTLTSEEAR</b>            | Just human | E9PH51,P00338,F5H308,B4DKQ2,B4DJI1,                                                                              | 1 | LDHA       | 3 |
| <b>EGSIEIDIPVK</b>          | Just human | E9PHF7,Q68D27,E7ETG7,E9PG35,Q96RQ3,                                                                              | 1 | MCCC1      | 3 |
| <b>LGVQTVAVYSEADR</b>       | Just human | Q96RQ3,G5E9X5,F8WDI3,                                                                                            | 1 | MCCC1      | 3 |
| <b>SEQEFQEQLESAR</b>        | Just human | E9PHF7,B4DHW5,Q68D27,E7ETG7,E9PG35,Q96RQ3,B4DH16,G5E9X5,F5GYT8,B7ZAW3,E7EX16,F5H2T9,                             | 1 | MCCC1      | 3 |
| <b>GDELADSALEIFK</b>        | Just human | Q53GU8,D6RBX4,B9ZVW9,G8JLA8,Q15582,                                                                              | 1 | TGFBI      | 3 |
| <b>NHIIKQQLASK</b>          | Just human | Q53GU8,B9ZVW9,G8JLA8,Q59F63,Q15582,                                                                              | 1 | TGFBI      | 3 |
| <b>VSTITNNIQIIEIDTFETLR</b> | Just human | Q53GU8,G8JLA8,Q15582,                                                                                            | 1 | TGFBI      | 3 |
| <b>APTAQVESFR</b>           | Just human | D3YHM4,Q4LE33,P24821,F5H7V9,E9PC84,A7MBN2,                                                                       | 1 | TNC        | 3 |
| <b>ITAQQQYELR</b>           | Just human | D3YHM4,Q4LE33,P24821,F5H7V9,E9PC84,A7MBN2,                                                                       | 1 | TNC        | 3 |
| <b>LIPGVEYLVSIAMK</b>       | Just human | D3YHM4,Q4LE33,P24821,F5H7V9,E9PC84,A7MBN2,                                                                       | 1 | TNC        | 3 |
| <b>HIDCAHVYQNEVEGVAIQEK</b> | Just human | Q59EL5,E9PCX2,E9PEF9,P15121,                                                                                     | 1 | AKR1B<br>1 | 2 |
| <b>SPPGQVTEAVK</b>          | Just human | Q59EL5,E9PCX2,E9PEF9,P15121,                                                                                     | 1 | AKR1B<br>1 | 2 |
| <b>ALTGHLEEVLLALK</b>       | Just human | B5BU38,Q5T3N0,Q5T3N1,P04083Q5TZZ9,                                                                               | 1 | ANXA1      | 2 |
| <b>SEDFGVNEDLADSDAR</b>     | Just human | B4DL19,B5BU38,P04083Q5TZZ9,                                                                                      | 1 | ANXA1      | 2 |
| <b>GLGTDEDSLIEICSR</b>      | Just human | B3KRQ1,A6NMY6,B4DNH8,P07355,                                                                                     | 1 | ANXA2      | 2 |
| <b>SALSGHLETVILGLLK</b>     | Just human | A6NMY6,B4DNH8,P07355,                                                                                            | 1 | ANXA2      | 2 |
| <b>GPPGPMGPPGLAGPPGESGR</b> | Just human | D3DTX7,P02452,Q6LAN8,                                                                                            | 1 | COL1A<br>1 | 2 |

|                                          |            |                                                                    |   |              |   |
|------------------------------------------|------------|--------------------------------------------------------------------|---|--------------|---|
| <b>GPYESGSGHSSGLGHR</b>                  | Just human | Q86YZ3,Q5DT20,                                                     | 1 | HRNR         | 2 |
| <b>HGSGSGHSSSYGQHSGSGWSS<br/>SSGR</b>    | Just human | Q86YZ3,Q5DT20,                                                     | 1 | HRNR         | 2 |
| <b>TALLDAAGVASLLTTAEVVVTEIP<br/>K</b>    | Just human | B3GQS7,B7Z5E7,P10809,B7Z597,B7Z4F6,                                | 1 | HSPD1        | 2 |
| <b>TALLDAAGVASLLTTAEVVVTEIP<br/>KEEK</b> | Just human | B3GQS7,B7Z5E7,P10809,B7Z597,B7Z4F6,                                | 1 | HSPD1        | 2 |
| <b>AGASLWGGLR</b>                        | Just human | B2R627,P08648,A8K6A5,                                              | 1 | ITGA5        | 2 |
| <b>SLQWFGATVR</b>                        | Just human | B2R627,P08648,A8K6A5,                                              | 1 | ITGA5        | 2 |
| <b>IYGGSVTGATCK</b>                      | Just human | P60174,Q2QD09,B7Z5D8,Q53HE2,B4DUI5,                                | 1 | TPI1         | 2 |
| <b>SNVSDAVAQSTR</b>                      | Just human | P60174,Q2QD09,B7Z5D8,Q53HE2,B4DUI5,                                | 1 | TPI1         | 2 |
| <b>VVNEECPTITR</b>                       | Just human | B4DJB3,Q8IUX7,                                                     | 1 | AEBP1        | 1 |
| <b>GILAADES VGSMK</b>                    | Just human | B7Z3K7,A8MVZ9,B7Z1H6,C9J8F3,P09972,B7Z3K9,                         | 1 | ALDOC        | 1 |
| <b>ILYHGYSLLYVQGNER</b>                  | Just human | F8WEC9,P02462,Q59F15,A9LSU1,                                       | 1 | COL4A<br>1   | 1 |
| <b>ETVSEESNVLCLSK</b>                    | Just human | Q6W6M8,Q8TA90,B4DPU3,P13639,                                       | 1 | EEF2         | 1 |
| <b>GNPTVEVDLYTAK</b>                     | Just human | F5H0C8,P09104Q6FHV6,F5H1C3,F5GWQ3,F5H5U1,F5GZ3<br>0,B7Z2X9,A8K3B0, | 1 | ENO2         | 1 |
| <b>ILLANFLAQTEALMR</b>                   | Just human | B4DVJ0,B4DG39,B4DE36,P06744,                                       | 1 | GPI          | 1 |
| <b>TLTLVDTGIGMTK</b>                     | Just human | O14942,B4DMA2,B4DGL0,Q58FF8,P08238,Q6PK50,                         | 1 | HSP90<br>AB1 | 1 |
| <b>ELEEIVQPIISK</b>                      | Just human | P11021,                                                            | 1 | HSPA5        | 1 |
| <b>LIIVSNPVDILTYVAWK</b>                 | Just human | Q9BYZ2,                                                            | 1 | LDHAL<br>6B  | 1 |
| <b>AAYEAELGDAR</b>                       | Just human | Q5I6Y4,Q5I6Y6,P02545,Q5I6Y5,Q8N519,Q3BDU5,Q6UYC<br>3,Q5TCJ4,       | 1 | LMNA         | 1 |
| <b>YIVLESDFTNVVR</b>                     | Just human | B4E1T8,Q08397,                                                     | 1 | LOXL1        | 1 |
| <b>EQADFALEALAK</b>                      | Just human | F2Z2U9,G8JLL9,F2Z2U8,B3KWH4,Q7Z406,F2Z2S7,                         | 1 | MYH14        | 1 |
| <b>ALEEAMEQK</b>                         | Just human | Q2PS10,P35579Q60FE2,                                               | 1 | MYH9         | 1 |
| <b>IDATSASVLASR</b>                      | Just human | P13667,                                                            | 1 | PDIA4        | 1 |

|                                              |                              |                                                                                                                                                                        |   |            |    |
|----------------------------------------------|------------------------------|------------------------------------------------------------------------------------------------------------------------------------------------------------------------|---|------------|----|
| <b>ALDLFSDNAPPELLEIINEDIAK</b>               | Just human                   | B7Z4M8,B3KY95,B7Z254,F8WA83,Q15084Q53RC7,B5MC Q5,                                                                                                                      | 1 | PDIA6      | 1  |
| <b>AHSSMVGVNLPQK</b>                         | Just human                   | B4E1H9,A8K4W6P00558,B7Z7A9,                                                                                                                                            | 1 | PGK1       | 1  |
| <b>TIANYLWVR</b>                             | Just human                   | B4DWG8,P78562,B4DNS0,B4E334,F5GXU4,                                                                                                                                    | 1 | PHEx       | 1  |
| <b>QITLNDLPVGR</b>                           | Just human                   | Q13162,E9PEN3,                                                                                                                                                         | 1 | PRDX4      | 1  |
| <b>FGQGAHHAAGQAGNEAGR</b>                    | Just human                   | E9PBV3,                                                                                                                                                                | 1 | SBSN       | 1  |
| <b>EAESCDCLQGFQLTHSLGGGTGS<br/>GMGTLLLSK</b> | Just human                   | Q5SQY1,Q3ZCM7,F5H0I4,C9JAA5,Q5SQY0,                                                                                                                                    | 1 | TUBB8      | 1  |
| <b>GFSGLQGPPGPPGSPGEQGPGSG<br/>ASGPAGPR</b>  | Just human                   | D3DTX7,B7Z4S2,P02452,                                                                                                                                                  | 2 | COL1A<br>1 | 2  |
| <b>IEISELNR</b>                              | Just human                   | P04264,P35908,                                                                                                                                                         | 2 | KRT2       | 12 |
| <b>MAATFIGNSTAIQELFK</b>                     | Just human                   | B4DJ43,P04350,B4DFH6,B4DE77,                                                                                                                                           | 2 | TUBB4<br>A | 1  |
| <b>YEELQITAGR</b>                            | Just human                   | P04264,P04259,F5H6G5,                                                                                                                                                  | 2 | KRT6B      | 3  |
| <b>FLEQQNQVLQTK</b>                          | Just human                   | P04264,P35908,Q7Z794,Q0IIN1,                                                                                                                                           | 3 | KRT77      | 1  |
| <b>ALEEANADLEVK</b>                          | Just human                   | P08779,B4E2J5,B4E204,P02533,C9JA77,P13646,P19012,B<br>3KVF5,B4DWU0,A1A4E9,A8K2H9,B4DL17,                                                                               | 4 | KRT15      | 1  |
| <b>DAEAWFNEK</b>                             | Just human                   | Q7Z3Y7,P13645,Q7Z3Y8,Q7Z3Z0,                                                                                                                                           | 4 | KRT27      | 2  |
| <b>WTLLQEQGTK</b>                            | Just human                   | E7EUE8,B4DRY0,P13647,B2R853,P02538,E7EU87,P48668,<br>P04259,B4E1T1,E7EQV7,F5H6G5,B4DWU6,F8W0C6,B4DK<br>V4,B4DRU6,A8K2I0,B4DRR0,                                        | 4 | KRT6B      | 3  |
| <b>AQYEEIAQR</b>                             | Just human                   | E7EUE8,B4DRS2,P35908,B4DRY0,F5H8K9,B4DKJ0,Q01546<br>,F8VS64,B2R853,P02538,P48668,P04259,E7EQV7,B4DRW<br>1,P19013,F5H6G5,B4DWU6,B4DKV4,B4DRR7,B4DRU6,A8<br>K2I0,B4DRR0, | 6 | KRT6B      | 3  |
| <b>VTMQNLNDR</b>                             | Just human                   | Q7Z3Y9,P08779,C9JT19,E7ENV4,P02533,Q7Z3Y7,P13645,<br>Q7Z3Y8,Q7Z3Z0,Q6ZPD6,                                                                                             | 7 | KRT27      | 2  |
| <b>NLIGTYMCICPGYQR</b>                       | Both<br>human and<br>chicken | F8W7L2,P35555,Q59HB9,D2 F1NII7,F1NJQ9,<br>JYH6,                                                                                                                        |   |            |    |



|                          |                        |                                                                                                    |                              |
|--------------------------|------------------------|----------------------------------------------------------------------------------------------------|------------------------------|
| <b>YVANMHGDETVGR</b>     | Both human and chicken | F8W111,P14384,F8VVI6,                                                                              | E1C041,                      |
| <b>LSPEELLR</b>          | Both human and chicken | Q53GY0,Q53FI1,B7Z6M1,Q59GX5,P13796,A8K579P13797,F8W8D8,Q14651,B4DGB4,C9JAM8,B4DPW9,Q96HI1,         | P19179,Q5ZI39,Q5ZLW0,        |
| <b>VGVVQYSSDTR</b>       | Both human and chicken | D6RGG3,Q99715,                                                                                     | P13944,F1NKN1,F1NM33,F1NX22, |
| <b>TFYQIGDSWEK</b>       | Both human and chicken | P02751,E9PE77,F8W7G7,E9PG29,E7ERA1,Q7Z391,B7ZLF0,B7ZLE5,Q564H7,Q6MZM7,Q6MZF4,                      | F1NJT3,F1NJT4,P11722,        |
| <b>NSIAYMDQASGNVK</b>    | Both human and chicken | E7ENY8,D2JYH5P02461,                                                                               | F1NI73,F1NI72,               |
| <b>IADGYEQAAR</b>        | Both human and chicken | A8K2X8,E9PCA1,B4DE30,E7EWW2,B4DZT5,B7ZAR1,B4DX08,P48643,B4DYD8,B4DYC8,Q9BU08,E7ENZ3,B4DXI1,B4DDU6, | Q5F411,F1NKN0,               |
| <b>LEGPFNIESVMDPIDVK</b> | Both human and chicken | F5H5T3,Q86SV6,B4E2M1,Q9Y625,O75487,B4E2C0,                                                         | F1NAU1,F1P027,               |
| <b>SGTSEFLNK</b>         | Both human and chicken | Q5CAQ5,Q59FC6,P14625,Q96GW1,                                                                       | P08110,F1NWB7,Q90WA6,B5AAV6, |
| <b>NLHALILVNNK</b>       | Both human and chicken | F8VWU0,F8VUF6,F8VXZ8,P07585Q6FH10,F8VX58,                                                          | E1BQ80,P28675,E1BRE9,        |

|                              |                        |                                                                                                                                                           |                              |
|------------------------------|------------------------|-----------------------------------------------------------------------------------------------------------------------------------------------------------|------------------------------|
| <b>LLETIDQLYLEYAK</b>        | Both human and chicken | B7TY16,Q86TX4,B7Z565,P12814,B7Z2W3,Q1HE25,B4DFY0,B3KUX9,                                                                                                  | P05094,                      |
| <b>VLVVVTDGR</b>             | Both human and chicken | B9EJB8,C9JLI9,D6RGG3,Q99715,                                                                                                                              | P13944,F1NKN1,F1NM33,F1NX22, |
| <b>VGEVIVTK</b>              | Both human and chicken | B3GQS7,F5GWR2,B7Z5E7,B7Z532,P10809,B7Z597,B7Z4F6,                                                                                                         | Q5ZL72,                      |
| <b>DLYANTVLSGGTTMYPGIADR</b> | Both human and chicken | P60709Q1KLZ0,Q9UE89,F5H0N0,Q6PJ43,B4E335,P63261,Q96FU6,B3KWQ3,B4E3A4,Q53G76,A5GZ75,F5GYT4,B7ZAP6,Q96DE1,A4UCT3,F1BXA6,B4DVQ0,Q53G99,Q53GK6,B4DW52,Q8WVW5, | P60706,P53478,G1K2Y7,Q5ZMQ2, |
| <b>SMEAEMIQQEELAAAER</b>     | Both human and chicken | Q6ZNL4,P35579Q60FE2,                                                                                                                                      | F1NCD4,P14105,               |
| <b>LITLEEEMTK</b>            | Both human and chicken | Q96C96,B4DUA5,B4DLN6,B4DNL5,E7EPA8,F5H8J2,P07237,                                                                                                         | P09102,F1N9H3,               |
| <b>FANSPRDLWVLER</b>         | Both human and chicken | Q16787,F5H8G3,E2QRK0,Q6VU67,Q5JTP4,Q566Q1,F5GWM0,Q5U4N9,B0YJ32,O15230,                                                                                    | F1NZZ2,                      |
| <b>NPDDITNEEYGEFYK</b>       | Both human and chicken | P07900,O75322,Q8TBA7,Q2VPJ6,Q86U12,                                                                                                                       | P11501,                      |
| <b>SQIFSTASDNQPTVTIK</b>     | Both human and chicken | P11021,                                                                                                                                                   | Q90593,                      |

|                               |                        |                                                                                                                                                            |                                     |
|-------------------------------|------------------------|------------------------------------------------------------------------------------------------------------------------------------------------------------|-------------------------------------|
| <b>LLIVSNPVDILTYVAWK</b>      | Both human and chicken | E9PH51,F5GXY2,P00338,F5H308,A8MXQ4,F8W819,B4DJI1,                                                                                                          | P00340,F1NW35,E1BTT8,               |
| <b>HGNALWLNER</b>             | Both human and chicken | B4DPF9,C9JPQ8,B2RDE0,P05165,                                                                                                                               | E1BR16,F1P0M2,                      |
| <b>TTAENEFVVLKK</b>           | Both human and chicken | F8W1S1,Q7RTS7,Q86Y46,                                                                                                                                      | O93532,                             |
| <b>LALDIEIATYR</b>            | Both human and chicken | B3KY79,B4DRS2,F5H8K9,B4DKJ0,Q969I0,F8VS64,E7ES34,B4E192,P14136,E9PAX3,B4DRW1,Q6PIN2,P19013,P08729,Q96GE1,F8VXB4,Q7L4M3,B4DRR7,P05787,A1L194,Q6KB66,B4DJW0, | Q6PVZ5,Q6PVZ4,F1NE70,Q6PVZ3,O93532, |
| <b>GTTGLPQEVHVLNLR</b>        | Both human and chicken | E9PKY4,Q03167,                                                                                                                                             | Q90998,                             |
| <b>FIEMGFIDEKR</b>            | Both human and chicken | Q12884,B4DLR2,B2RD89,                                                                                                                                      | F1NDP3,                             |
| <b>PSAYNFDNSPVLQEWVTATDIR</b> | Both human and chicken | P11047,                                                                                                                                                    | F1NK49,                             |
| <b>LVQAFQFTDK</b>             | Both human and chicken | Q06830,B2R4P2,                                                                                                                                             | P0CB50,G1K326,                      |
| <b>EDSQRPGAHLTVK</b>          | Both human and chicken | F8W646,Q6IPF2,P09651,Q0VAC0,F8VSB5,F8VXY0,F8VYN5,B4DP35,F8W1S7,Q32P51,F8VZ49,F8VRQ1,Q9BSM5,F8                                                              | Q5ZLB3,                             |

|                          |                        |                                                                                                                                                                     |                                         |
|--------------------------|------------------------|---------------------------------------------------------------------------------------------------------------------------------------------------------------------|-----------------------------------------|
|                          |                        | W6I7,                                                                                                                                                               |                                         |
| <b>EIVHLQAGQCGNQIGAK</b> | Both human and chicken | B4DJ43,P04350,P68371,B4D<br>NW1,Q8N6N5,Q8IWP6,B4DF<br>H6,Q8IZ29,                                                                                                    | G1K342,F1NYB1,P09206,                   |
| <b>SYYYAISDFAVGGR</b>    | Both human and chicken | P11047,                                                                                                                                                             | F1NI05,F1NK49,Q90ZN3,                   |
| <b>FSVHQQSEMDSVK</b>     | Both human and chicken | E7EWZ6,A5YM53,P06756,B7<br>ZLX0,B7Z883,                                                                                                                             | F1NGX1,F1NWS1,P26008,                   |
| <b>NQVAMNPTNTVFDK</b>    | Both human and chicken | B4DTX2,E9PK54,E9PQK7,E9P<br>LF4,Q53HF2,P11142,E9PNE6<br>,E9PKE3,E9PQQ4,E7ET08,E9<br>PN25,Q53GZ6,E9PPY6,                                                             | O73885,F1NWP3,F1NRW<br>7,               |
| <b>KLENCNYAVELGK</b>     | Both human and chicken | Q53GY0,B4DI60,Q53FI1,B7Z<br>6M1,Q59GX5,P13796,A8K57<br>9P13797,F8W8D8,B4DGB4,B<br>4DPW9,B4DPU6,Q96HI1,B4<br>DG31,B3KUI1,                                            | Q5ZLW0,                                 |
| <b>TSGFLCNR</b>          | Both human and chicken | B7ZLD5,Q2VP98,Q0VF97,Q5<br>9H46,A0AVL6,B7ZLD8,B4E3<br>NO,P16144,                                                                                                    | E1C9G7,                                 |
| <b>ILLAELEQLK</b>        | Both human and chicken | P08670,Q53HU8,B3KRK8,F5<br>H288,B0YJC4,                                                                                                                             | Q49MC1,F1NXT0,F1NFH3,P09654,F1NJ08<br>, |
| <b>KYEDEINKR</b>         | Both human and chicken | P04264,E7EUE8,P35908,Q96<br>9I0,P13647,Q147W7,F8VP67<br>,Q01546,B2R853,F8VUG2,P0<br>2538,Q7Z794,E7EU87,P4866<br>8,P04259,B4E1T1,E7EQV7,Q<br>OIIN1,F8VXB4,B4DWU6,F8W | O93532,                                 |

|                      |                              |                                                                                                                                                                                                                                                                                                                                                                                                                                                                                                                                                                                                                                      |                                                                                          |
|----------------------|------------------------------|--------------------------------------------------------------------------------------------------------------------------------------------------------------------------------------------------------------------------------------------------------------------------------------------------------------------------------------------------------------------------------------------------------------------------------------------------------------------------------------------------------------------------------------------------------------------------------------------------------------------------------------|------------------------------------------------------------------------------------------|
|                      |                              | OC6,F5GY66,P12035,F8W1U<br>3,B4DL32,B4DRU6,A8K2IO,P<br>05787,B4DRRO,F8VU64,                                                                                                                                                                                                                                                                                                                                                                                                                                                                                                                                                          |                                                                                          |
| <b>ALEQQVEEMK</b>    | Both<br>human and<br>chicken | Q6ZNL4,P35579Q60FE2,                                                                                                                                                                                                                                                                                                                                                                                                                                                                                                                                                                                                                 | F1NCD4,P14105,                                                                           |
| <b>IWHHTFYNELR</b>   | Both<br>human and<br>chicken | P60709Q1KLZ0,A5A3E0,Q56<br>2Q2,Q562X1,C9JZR7,P0CG38<br>,B7Z6P1,Q562T0,Q562Y4,Q5<br>62T5,G5E9R0,Q562Q6,Q562<br>M3,E7EQV5,Q562X6,Q562T6<br>,Q562R5,F5H0N0,Q562R6,Q<br>562Y6,B4E335,P63261,Q562<br>U1,Q562M5,Q562T8,Q562Q<br>4,Q6S8J3,Q7Z7J6,Q562N0,Q<br>562U0,A6NL76,B4E3A4,Q53<br>G76,Q562X2,Q562X9,Q562N<br>8,Q562X4,Q562L5,F5GYT4,Q<br>562N2,Q562Q9,P68032,E7E<br>VS6,Q562T3,Q562Y8,A1E282<br>,Q562L3,Q562L6,Q562W2,B<br>4DVQ0,Q562P9,Q562P8,Q53<br>G99,P68133,Q562N6,Q562X<br>7,P0CG39,Q562S0,Q562T9,Q<br>562R0,Q562N4,Q5T8M8,Q5<br>62X0,C9JUM1,Q562Q8,Q562<br>T4,A8K3K1,Q53GK6,Q9BYX7,<br>Q562U2,B4DW52,Q562Q0,Q<br>562Z7,Q8WVW5, | F1N835,P60706,Q5ZLX9,P68034,F1NDV5,P53478,G1K2Y7,A9YXX<br>3,P68139,Q5ZMQ2,B5M200,G8HUH5, |
| <b>SSGIENGAFQGMK</b> | Both<br>human and<br>chicken | P07585Q6FH10,                                                                                                                                                                                                                                                                                                                                                                                                                                                                                                                                                                                                                        | E1BQ80,P28675,E1BRE9,                                                                    |

|                         |                        |                                                                                                                                                                                                                                                                                |                                                                                                           |
|-------------------------|------------------------|--------------------------------------------------------------------------------------------------------------------------------------------------------------------------------------------------------------------------------------------------------------------------------|-----------------------------------------------------------------------------------------------------------|
| <b>TGAIVDVPVGEELLGR</b> | Both human and chicken | A8K092,P25705,B4DGW3,                                                                                                                                                                                                                                                          | F1NI22,Q8UVX3,Q90VX2,F1NGA2,                                                                              |
| <b>IINEPTAAAIAYGLDK</b> | Both human and chicken | B3KTV0,B4E1Q1,E9PI65,B2RCQ9,B4DTX2,Q96IS6,P11021,B4DEF7,E9PLF4,Q53HF2,P54652,Q53FA3,P11142,F8WE E3,E9PN89,E9PKE3,B4DI54,F8W1P1,B4DXY3,E7ET08,P34931,                                                                                                                           | Q7SX63,Q90593,P08106,O73885,D6PVB7,B6EAX2,F1NWP3,F1NRW7,B3VHV2,                                           |
| <b>GATYNIIVEALK</b>     | Both human and chicken | B4DN21,B4DTH2,B4DTK1,B4DU16,Q6PJE5,B7ZLF0,B7ZLE5,Q6N084,Q59G22,Q68CX6,Q6MZM7,                                                                                                                                                                                                  | F1NJT3,F1NJT4,P11722,                                                                                     |
| <b>TFAPEEISAMVLTK</b>   | Both human and chicken | P11021,B4DEF7,                                                                                                                                                                                                                                                                 | Q90593,                                                                                                   |
| <b>DSYVGDEAQSKR</b>     | Both human and chicken | P60709Q1KLZ0,B8ZZJ2,B3KUD3,C9JZR7,B7Z6P1,G5E9R0,E7EQV5,B7Z6I1,F5H0N0,B4E335,P63261,C9JFL5,Q7Z7J6,A6NL76,B4E3A4,F5H1C1,Q53G76,P68032,E7EVS6,P63267,A1E282,B4DVQ0,D2JYH4P62736,Q53G99,P68133,F8WB63,C9JTX5,Q5T8M8,C9JUM1,B3KW67,Q5T8M7,A8K3K1,Q53GK6,F6UVQ4Q5T9N7,B4DUI8,Q8WVW5, | F1N835,P60706,Q5ZLX9,Q90736,P68034,P53478,F1P252,P63270,F1N8P3,G1K2Y7,P08023,P68139,Q5ZMQ2,B5M200,G8HUH5, |
| <b>SLSSQIETMR</b>       | Both human and chicken | B4DTC0,P05997,Q5PR22,D3DPH5,                                                                                                                                                                                                                                                   | F1P5A7,F1P563,                                                                                            |

|                             |                        |                                                                                                                                                                                                                                   |                                                                                                                                                                             |
|-----------------------------|------------------------|-----------------------------------------------------------------------------------------------------------------------------------------------------------------------------------------------------------------------------------|-----------------------------------------------------------------------------------------------------------------------------------------------------------------------------|
| <b>EYGAVTSFTELK</b>         | Both human and chicken | Q03167,                                                                                                                                                                                                                           | Q90998,                                                                                                                                                                     |
| <b>TIGGGDDSFNTFFSETGAGK</b> | Both human and chicken | F8VXB8,B3KT06,F8VX09,Q8 N532,G3V1U9,E9PGK3,Q137 48Q1ZYQ1,F8VQQ4,E7ET24, Q9BQE3,B4DN58,B3KPS3,F8 VVB9,F8VWX4,F5H5D3,F8W 0F6,P68363,Q71U36,F8VWV 9,Q53GA7,F8VS94,Q8WU19, Q6PEY2,F8VXZ7,F8VRZ4,B7Z 1K5,F8VS66,F8VRK0,A8JZY9, F8VYI2, | F1NXR6,P02552,F1NXR7,F1N9J7,F1NRB9,                                                                                                                                         |
| <b>VAVLGASGGIGQPLSLLLK</b>  | Both human and chicken | P40926,Q75MT9,Q6FHZ0,B4 DE44,E9PDB2,Q0QF37,                                                                                                                                                                                       | E1BVT3,                                                                                                                                                                     |
| <b>KLLEGEESR</b>            | Both human and chicken | B3KY79,Q45VM8,Q45VM6,Q 549R8,P17661Q53SB5,P086 70,B0YJC5,Q969I0,Q9H319, Q53HU8,Q549R9,Q9H552,Q 45VM7,E7ES34,B3KRK8,A5Z 217,F5H288,P41219,P08729, Q96GE1,B0YJC4,B3KWQ6,F8 VXB4,Q7L4M3,P05787,Q549 R7,                              | Q6PVZ5,F1NE70,F1NXT0,F1NFB3,Q49MCO,P09654,F1NJ08,O935 32,                                                                                                                   |
| <b>NLDIERPTYTNLNR</b>       | Both human and chicken | B4DDU2,B3KT06,G3V1U9,A8 MUB1,Q9UQM3,Q13748Q1Z YQ1,F8VQQ4,B4DQK4,Q9H8 53,Q7Z3M3,Q9BQE3,C9JDS9 ,B3KPS3,F8VVB9,F5H5D3,P6 8363,Q9NY65,Q71U36,F8VX Z4,Q53GA7,Q6PEY2,B7Z1K5,                                                            | F1P5B0,P08070,F1NXR6,P09643,F1NUP6,F1NMP5,P02552,F1NJ N1,F1NJN6,F1NW97,P09644,Q6PTX0,F1NXR7,P09645,F1N9J7,F1 P3N2,F1NMP4,P09642,F1NMP6,F1NW96,F1NRB9,F1P3N4,F1NM P7,F1NMP3, |

|                            |                              |                                                                                                                                                                            |                                                                                           |
|----------------------------|------------------------------|----------------------------------------------------------------------------------------------------------------------------------------------------------------------------|-------------------------------------------------------------------------------------------|
|                            |                              | P68366,A8JZY9,B3KPW9,C9J<br>2C0,                                                                                                                                           |                                                                                           |
| <b>EGIPALDNFLDKL</b>       | Both<br>human and<br>chicken | Q8TA90,B4DPU3,P13639,                                                                                                                                                      | F1NFS0,Q90705,                                                                            |
| <b>EMEENFAVEAANYQDTIGR</b> | Both<br>human and<br>chicken | P08670,B0YJC5,Q53HU8,B3K<br>RK8,F5H288,B0YJC4,                                                                                                                             | F1NXT0,F1NFH3,Q49MC0,P09654,F1NJ08<br>,                                                   |
| <b>ADLEMQIENLKEELAYLK</b>  | Both<br>human and<br>chicken | F5GWP8,Q14666,Q04695,                                                                                                                                                      | Q6PVZ1,F1NPR7,F1NDP0,                                                                     |
| <b>GVVDSDDLPLNVSR</b>      | Both<br>human and<br>chicken | Q5CAQ5,B4DHT9,E9PEX3,Q5<br>9FC6,B4DU71,P14625,                                                                                                                             | P08110,F1NWB7,Q90WA6,B5AAV6,                                                              |
| <b>LNLAFFVANLFNK</b>       | Both<br>human and<br>chicken | Q53GY0,B7Z6M1,A8K579P1<br>3797,F8W8D8,B4DGB4,B4DP<br>W9,Q96HI1,B4DG31,                                                                                                     | Q5ZI39,                                                                                   |
| <b>APDFVIFYAPR</b>         | Both<br>human and<br>chicken | B2R6J2,Q9UJU1,Q6NUR7,B0<br>YJ88P35241,B7Z2S7,Q05CU6<br>,B7Z9U6,A7YIJ8,P26038,B7Z<br>437,Q6PJT4,B7Z5V2,F5H1A7<br>,P15311,E7EQR4,Q9UJZ6,Q9<br>UJZ8,Q9UK20,Q9UJZ2,Q6PK<br>D3, | F1P3H9,F1P0I4,Q9YGW6,Q9PU45,F1NQD9,E1BV34,                                                |
| <b>SLDMDSIIAEVK</b>        | Both<br>human and<br>chicken | Q969I0,F8VUG2,F8VXB4,Q7L<br>4M3,P05787,F8VU64,                                                                                                                             | Q6PVZ4,                                                                                   |
| <b>FPGQLNADLR</b>          | Both<br>human and<br>chicken | Q2NKY5,B4DJ43,B7ZAF0,B4<br>DY90,O43209,P04350,B4DXZ<br>5,Q5SQY1,Q9H4B7,B3KS31,F<br>8VUJ7,A5D907,P68371,Q9B<br>UU9,A5D906,B2R6L0,Q3ZC                                       | P09207,G1K342,F1NMMU4,G1K338,P09244,P32882,P09653,F1NY<br>B1,E1C520,P09203,P09652,P09206, |



|                           |                        |                                                                                                                                                                                                                                                                                                                               |                                                                                |
|---------------------------|------------------------|-------------------------------------------------------------------------------------------------------------------------------------------------------------------------------------------------------------------------------------------------------------------------------------------------------------------------------|--------------------------------------------------------------------------------|
|                           |                        | M7,Q9BV28,B3KML9,Q8N6N5,Q3ZCR3,G3V2A3,Q96HX0,Q9UGA2,F8VW92,Q6LC01,E7ENH1,F5H0I4,C9JAA5,Q5SQY0,Q8IWP6,B2RBD5,B7Z4N1,F5H894,B7ZAK1,A8K854,B4E052,Q9BVA1,Q13885,F8VYX6,P07437Q5SU16,Q13509,B4E386,B4DMU8,Q96B85,A6NKZ8,Q53G92,E7EWR1,E7EX69,Q5JP53,B4DE77,B4DP54,A6NNZ2,Q8IZ29,A1L196,F5H8C9,Q9BUF5,Q5ST81,A1L195,Q1KSF8,B4DQN9, |                                                                                |
| <b>QTVAVGVIK</b>          | Both human and chicken | Q504Z0,B4DNE0,Q14222,Q9NZS6,B4DV42,Q5VTE0,Q53HR1,Q53GE9,A8K9C4,Q8TBL1,P68104Q6IPS9,Q96C29,Q05639,Q6P082,Q53HR5,Q96EB3,Q6IPN6,Q6P4C9,Q53HQ7,Q53HM9,Q6IQ15,Q53GA1,Q2F837,Q8IUB0,Q96CD8,Q96RE1,Q53G85,B4E2C5,Q53G89,Q16577,Q6IPT9,                                                                                               | F1N9H4,Q5ZKM2,Q90835,                                                          |
| <b>TVLIMELINNVAK</b>      | Both human and chicken | Q0QEN7,P06576,F8W0P7,F8VPV9,F8W079,                                                                                                                                                                                                                                                                                           | Q5ZLC5,                                                                        |
| <b>GHYTEGAELVDSVLDVVR</b> | Both human and chicken | Q2NKY5,B7ZAF0,O43209,E9PBJ4,A5D907,P68371,A5D906,B2R6L0,Q9BV28,B4DMJ5,Q8N6N5,Q3ZCR3,G3V2A3,F8VW92,Q6LC01,Q8IWP6,B2R                                                                                                                                                                                                           | G1K342,F1NMMU4,G1K338,P09244,P32882,P09653,F1NYB1,E1C520,P09203,P09652,P09206, |

|                            |                              |                                                                                                                                    |                                          |
|----------------------------|------------------------------|------------------------------------------------------------------------------------------------------------------------------------|------------------------------------------|
|                            |                              | BD5,B7ZAK1,A8K854,Q9BVA<br>1,Q13885,F8VYX6,P07437Q5<br>SU16,Q13509,Q53G92,Q5JP<br>53,Q8IZ29,Q5ST81,A1L195,                         |                                          |
| <b>LIALLEVLSQK</b>         | Both<br>human and<br>chicken | Q60FE6,F8WE98,Q60FE7,Q1<br>4315,Q5HY54,E9KL45P2133<br>3,Q60FE5,B2ZZ83,A6NDY9,O<br>75369,                                           | Q9YGW4,Q90WF1,Q7ZZR8,Q90WF0,Q90<br>574,  |
| <b>SFNDDAMLIEK</b>         | Both<br>human and<br>chicken | E9PHF7,B4DHW5,Q68D27,E<br>7ETG7,E9PG35,Q96RQ3,B4D<br>H16,G5E9X5,F5GYT8,B7ZAW<br>3,E7EX16,F5H2T9,                                   | Q5ZK45,F1NYK3,                           |
| <b>MASTFIGNSTAIQELFK</b>   | Both<br>human and<br>chicken | Q2NKY5,B3KS31,B4E386,B4<br>DP54,Q9BUF5,                                                                                            | F1NMMU4,P09653,                          |
| <b>ALANSLACQGK</b>         | Both<br>human and<br>chicken | P04075,                                                                                                                            | Q92007,                                  |
| <b>LYMQNSELFK</b>          | Both<br>human and<br>chicken | F5H5T3,Q86SV6,O75487,B4E<br>2C0,                                                                                                   | F1NAU1,                                  |
| <b>NLMQLNLAHNILR</b>       | Both<br>human and<br>chicken | Q7Z4B2,P51888Q6FG38,Q6F<br>HG6,                                                                                                    | E1C7T4,                                  |
| <b>RIPVQAVWAGWGHASENPK</b> | Both<br>human and<br>chicken | O00763,F8W8T8,B2ZZ90Q13<br>085,                                                                                                    | F1P5V8,F1NWT0,F1NH15,F1P1B5,P11029<br>,  |
| <b>ALTVPELTQQMFDK</b>      | Both<br>human and<br>chicken | Q2NKY5,B4DJ43,P04350,P68<br>371,Q9BV28,B3KML9,Q8N6<br>N5,Q3ZCR3,Q96HX0,Q8IWP<br>6,B2RBD5,A8K854,B4DFH6,<br>Q13509,Q53G92,B4DE77,Q8 | G1K342,F1NMMU4,P09653,F1NYB1,P0965<br>2, |

|                       |                        |                                                                                                                                                                                                                                                                                                                                                        |                                                                                      |
|-----------------------|------------------------|--------------------------------------------------------------------------------------------------------------------------------------------------------------------------------------------------------------------------------------------------------------------------------------------------------------------------------------------------------|--------------------------------------------------------------------------------------|
|                       |                        | IZ29,                                                                                                                                                                                                                                                                                                                                                  |                                                                                      |
| <b>NSSYFVEWIPNNVK</b> | Both human and chicken | Q2NKY5,B4DJ43,B7ZAF0,B4DY90,O43209,P04350,B4DXZ5,E9PBJ4,B3KS31,F8VUJ7,P68371,Q9BUU9,B2R6L0,Q9BV28,B3KML9,B4DMJ5,Q8N6N5,Q96HX0,Q9UGA2,F8VW92,Q6LC01,E7ENH1,Q6P602,Q8IWP6,B2RBD5,B7Z4N1,B7ZAK1,A8K854,B4E052,Q9BVA1,Q13885,B4DFH6,A4UCT2,F8VYX6,P07437Q5SU16,Q13509,B4E386,Q96B85,E7EWR1,E7EX69,Q5JP53,B4DE77,B4DP54,Q8IZ29,F5H8C9,Q9BUF5,Q5ST81,B4DQN9, | P09207,G1K342,F1NMU4,G1K338,P09244,P32882,P09653,F1NYB1,E1C520,P09203,P09652,P09206, |
| <b>NLATTVTEEILEK</b>  | Both human and chicken | E7ETM7,B2R7W4,E7ERE4,O43390,B4DMD1,Q2L7G6,B4DT28,Q6MZS5,Q0VGD6,B4DMB1,                                                                                                                                                                                                                                                                                 | E1BZR1,                                                                              |
| <b>WLPSSSPVTGYR</b>   | Both human and chicken | A6YID3,P02751,E9PE77,B4DTK1,A6YID5,A6YID4,F8W7G7,A6YID6,E7ERA1,B4DU16,B7ZLF0,A6YID7,A6YID2,B7ZLE5,Q6N084,Q59G22,Q68CX6,Q6MZM7,Q5CZ99,                                                                                                                                                                                                                  | F1NJT3,F1NJT4,P11722,                                                                |
| <b>GRQHGPNVCAVQK</b>  | Both human and chicken | Q53GU8,G8JLA8,Q15582,                                                                                                                                                                                                                                                                                                                                  | O42390,                                                                              |
| <b>LPACVVDCGTGYTK</b> | Both human and         | F8WEW2,P61158Q53QM2,F8WE84,                                                                                                                                                                                                                                                                                                                            | Q90WD0,                                                                              |

|                        |                        |                                                                                                                                                                                                                 |                                                                                                    |
|------------------------|------------------------|-----------------------------------------------------------------------------------------------------------------------------------------------------------------------------------------------------------------|----------------------------------------------------------------------------------------------------|
|                        | chicken                |                                                                                                                                                                                                                 |                                                                                                    |
| <b>VFSGLVSTGLK</b>     | Both human and chicken | F5GZG3,Q8TA90,Q6PK56,P13639,F5H370,B4DRE8,                                                                                                                                                                      | F1NFS0,Q90705,                                                                                     |
| <b>SIATLAITLLK</b>     | Both human and chicken | Q9UBF2,Q9Y678,Q9H9B7,B3KW21,Q2NLA0,Q9NUP3,Q8WUI6,B3KND4,F5GXH1,                                                                                                                                                 | Q5F402,E1C7T8,F1NB52,                                                                              |
| <b>NPELQNLDDFFK</b>    | Both human and chicken | B4DQJ8,A9Z1X1,B4E2U0,F5H0L3,A8K2Y9P52209,F5H7U0,B4DV68,                                                                                                                                                         | Q5ZIZ0,                                                                                            |
| <b>GQAGVMGFPGPK</b>    | Both human and chicken | P02452,Q6LAN8,                                                                                                                                                                                                  | P02457,                                                                                            |
| <b>HLEINPDHSIIETLR</b> | Both human and chicken | P07900,O75322,Q8TBA7,Q96HX7,                                                                                                                                                                                    | P11501,                                                                                            |
| <b>VSWDPSPPVLGYK</b>   | Both human and chicken | B9EJB8,C9JLI9,D6RGG3,Q99715,                                                                                                                                                                                    | P13944,F1NKN1,F1NM33,F1NX22,                                                                       |
| <b>LAAAVSNFGYDLYR</b>  | Both human and chicken | F1T092P36955,                                                                                                                                                                                                   | E1C7H6,                                                                                            |
| <b>ESTLHLVLR</b>       | Both human and chicken | F5GXX7,P62987Q3MIH3,F5GYU3,F5H747,F5H6Q2,Q59EM9,Q9UFQ0,F5GYX6,F5H265,Q96C32,P0CG48,Q96MH4,Q66K58,F5H2Z3,Q8WYN9,F5H041,F5H388,B2RDW1P62979,A8K674,Q5PY61,Q5RKT7,F5H7Y5,P0CG47Q5U5U6,B4DV12,Q5UGI3,F5H7K6,Q96H31, | Q91021,P0CG62,P79781,F1NFJ4,F1NGE4,F1NAV4,O42388,F1P0H6,F1NGE3,P62985,F1NGL4,F2Z4K9,F1P0H5,F1NGE2, |

|                         |                        |                                                                                                                                                                                                                           |                                                                                                    |
|-------------------------|------------------------|---------------------------------------------------------------------------------------------------------------------------------------------------------------------------------------------------------------------------|----------------------------------------------------------------------------------------------------|
| <b>IMNTFSVVPSPK</b>     | Both human and chicken | B7ZAF0,B4DY90,P04350,F8V UJ7,P68371,Q9BUU9,Q9BV28,B3KML9,Q8N6N5,Q3ZCR3,G3V2A3,F8VW92,Q6LC01,Q8IWP6,B2RBD5,F5H894,B7ZAK1,A8K854,B4E052,F8VYX6,P07437Q5SU16,Q13509,Q53G92,E7EWR1,Q5JP53,B4DE77,Q8IZ29,Q5ST81,Q1KSF8,B4DQN9, | P09207,G1K342,P09244,F1NYB1,P09652,P09206,                                                         |
| <b>LISQIVSSITASLR</b>   | Both human and chicken | B4DDU2,B3KT06,A8MUB1,Q9H853,Q7Z3M3,Q9BQE3,C9JDS9,B3KPS3,F8VVB9,F5H5D3,P68363,Q9NY65,Q53GA7,Q8WU19,B7Z1K5,P68366,A8JZY9,B3KPW9,C9J2C0,                                                                                     | P08070,F1NXR6,P09643,F1NMP5,F1NJN1,F1NJN6,F1NW97,P09644,Q6PTX0,F1NXR7,F1NMP4,F1NMP6,F1NMP7,F1NMP3, |
| <b>IGAEVYHNLK</b>       | Both human and chicken | E2DRY6,P06733,Q9BT62,A4UCS8,                                                                                                                                                                                              | Q5ZIQ4,F1NG74,P51913,F1NZE7,O57391,F1NZ78,                                                         |
| <b>PANPDEIGNFIDENLK</b> | Both human and chicken | A8K1U7P12830,Q9UII8,D3XNU5,Q9UII7,F5GYI6,                                                                                                                                                                                 | E1C6M9,P33145,F1NUS5,P08641,                                                                       |
| <b>VTWDSSFCAVNPR</b>    | Both human and chicken | F8W1H8,A7MAP0,Q53G58,B4DMH3,F8VRE9,A7MAP1,F8VSA4,Q9ULV4,F8VUX3,F8VV B7,B3KN06,Q59EA2,F8VTT6,                                                                                                                              | Q5ZI60,Q5ZLS1,Q5ZM70,Q5ZM02,F1NIQ6,F1NIQ7,F1NXA5,                                                  |
| <b>TATPQQAQEVHEK</b>    | Both human and chicken | P60174,B7Z5D8,Q53HE2,B4DUI5,                                                                                                                                                                                              | P00940,                                                                                            |
| <b>AVTEQGHELSNEER</b>   | Both human and chicken | Q4VY19,B5BU24,Q59EQ2,Q4VY20,P31946,                                                                                                                                                                                       | Q5ZLQ6,                                                                                            |

|                           |                        |                                                                                                                     |                                            |
|---------------------------|------------------------|---------------------------------------------------------------------------------------------------------------------|--------------------------------------------|
| <b>GDIASQNM MR</b>        | Both human and chicken | B9EJB8,C9JLI9,D6RGG3,A2A2 K5,Q99715,                                                                                | P13944,F1NKN1,F1NM33,F1NX22,               |
| <b>LTPITIFMEYR</b>        | Both human and chicken | E7EWZ6,A5YM53,P06756,B7 ZLX0,B7Z883,                                                                                | F1NGX1,F1NWS1,P26008,                      |
| <b>VDDIICDSR</b>          | Both human and chicken | E7EPA6,G3XAI2,P07942,                                                                                               | F1NUC1,Q01635,F1NJ23,                      |
| <b>AVVMDLLR</b>           | Both human and chicken | B2ZZ90Q13085,                                                                                                       | F1P5V8,F1NWT0,P11029,                      |
| <b>FADLSEAANR</b>         | Both human and chicken | P08670,B0YJC5,Q53HU8,B3K RK8,F5H288,B0YJC4,Q5JVS8,                                                                  | F1NXT0,F1NFH3,Q49MC0,P09654,F1NJ08 ,       |
| <b>SQECYFDPELYR</b>       | Both human and chicken | P11047,                                                                                                             | F1NI05,F1NK49,Q90ZN3,                      |
| <b>DQEQQDVLLFIDNIFR</b>   | Both human and chicken | QOQEN7,P06576,F8W0P7,                                                                                               | Q5ZLC5,                                    |
| <b>ITeseEVVSR</b>         | Both human and chicken | Q5I6Y4,Q5I6Y6,P02545,Q5I6 Y5,Q8N519,Q3BDU5,Q6UYC 3,Q5TCJ4,                                                          | P13648,                                    |
| <b>HALIYDDLK</b>          | Both human and chicken | A8K092,P25705,B4DY56,                                                                                               | F1NI22,Q8UVX3,F1NGA2,                      |
| <b>AAVPSGASTGIYEALRLR</b> | Both human and chicken | F5H0C8,D3DTL2,P09104Q6F HV6,P13929,F5H1C3,P06733 ,F5GWQ3,F5H5U1,E5RI09,F5 GZ30,B7Z2X9,E5RG95,B4DUJ 6,A8K3B0,E5RGZ4, | Q5ZIQ4,F1NG74,P51913,F1NZE7,O57391,F1NZ78, |

|                      |                        |                                                                                                                                |                                                                 |
|----------------------|------------------------|--------------------------------------------------------------------------------------------------------------------------------|-----------------------------------------------------------------|
| <b>IVSQLLTLMDGLK</b> | Both human and chicken | P55072,Q96IF9,Q9HAP1,                                                                                                          | F1P4V8,E1BTS8,Q5ZMU9,                                           |
| <b>SIQFVDWCPTGFK</b> | Both human and chicken | B4DDU2,B3KT06,A8MUB1,B3KPS3,P68363,Q8WU19,P68366,A8JZY9,                                                                       | F1P5B0,F1NXR6,F1NW97,P09644,F1NXR7,F1P3N2,P09642,F1NW96,F1P3N4, |
| <b>IGVLITDGK</b>     | Both human and chicken | B9EJB8,C9JLI9,A2A2K4,D6RG3,Q99715,                                                                                             | P13944,F1NKN1,F1NM33,F1NX22,                                    |
| <b>NLQNLILTAIK</b>   | Both human and chicken | P53675,Q00610,                                                                                                                 | F1NYC4,F1NW23,F1P3J0,                                           |
| <b>SLTNDWEDHLAVK</b> | Both human and chicken | B4DMA2,P07900,B4DGL0,O75322,P08238,Q6PK50,Q8TB A7,Q2VPJ6,Q86U12,Q96HX7                                                         | P11501,Q04619,F1NC33,F1NDI7,                                    |
| <b>SADTLWGIQK</b>    | Both human and chicken | E9PH51,P00338,F5H308,B4DKQ2,B4DJI1,                                                                                            | P00340,F1NW35,E1BTT8,                                           |
| <b>WCHDNGVNYK</b>    | Both human and chicken | Q9H382,P02751,Q53S27,E9PE77,B4DN21,B4DTH2,B4DTK1,F8W7G7,E7ERA1,B4DU16,Q6PJE5,B7ZLF0,B7ZLE5,Q6N084,Q59G22,Q7L553,Q68CX6,Q6MZM7, | F1NJT3,F1NJT4,P11722,                                           |
| <b>HLYTHMTHFLK</b>   | Both human and chicken | Q12884,B4DLR2,B2RD89,                                                                                                          | F1NDP3,                                                         |
| <b>KFDQLLAEEK</b>    | Both human and chicken | D3DTS1,G8JLL9,F2Z2U8,Q68D89,Q149N4,F8VTL3,B2RWP9,Q4LE45,Q7Z406,F8W6L6,Q7Z7R0,O14729,A1L2Z2,B4E1                                | F1NCD4,P14105,                                                  |

|                            |                              |                                                                                                                                                           |                                         |
|----------------------------|------------------------------|-----------------------------------------------------------------------------------------------------------------------------------------------------------|-----------------------------------------|
|                            |                              | 77,D2JYH7P35749,Q3MNF1,<br>O14794,Q3MIV8,Q3MNF0,B<br>1PS43,P35580,P35579Q60FE<br>2,                                                                       |                                         |
| <b>GTVACGQPPVVENAK</b>     | Both<br>human and<br>chicken | Q59FG9,E9PF17,B7Z3R6,P13<br>611,Q6MZK8,                                                                                                                   | E1C5G1,Q90953,                          |
| <b>DATNVGDEGGFAPNILENK</b> | Both<br>human and<br>chicken | E2DRY6,P06733,Q9BT62,                                                                                                                                     | Q5ZIQ4,P51913,F1NZE7,F1NZ78,            |
| <b>VISGVLQLGNIVFK</b>      | Both<br>human and<br>chicken | Q86XU5,A8K6E4,B4E3S1,P35<br>579Q60FE2,                                                                                                                    | P14105,                                 |
| <b>PAQGVVTTLENVSPPR</b>    | Both<br>human and<br>chicken | A6YID3,P02751,E9PE77,B4D<br>TK1,A6YID5,A6YID4,F8W7G7<br>,A6YID6,E7ERA1,B4DU16,O9<br>5617,B7ZLF0,A6YID2,B7ZLE5<br>,Q6N084,Q9UQS6,Q59G22,<br>Q68CX6,Q5CZ99, | F1NJT3,F1NJT4,P11722,                   |
| <b>YFPTQALNFAFK</b>        | Both<br>human and<br>chicken | P05141,P12235,Q9H0C2,Q6<br>NVC0,B2RCV1,P12236Q6I9V<br>5,A8K787,Q59EI9,Q59EP7,                                                                             | F1NFF6,Q8AYM3,F1NBW8,Q5ZMJ6,Q5ZL<br>G7, |
| <b>NPDDITQEYGEFYK</b>      | Both<br>human and<br>chicken | B4DMA2,B4DGL0,P08238,Q<br>6PK50,                                                                                                                          | Q04619,F1NC33,F1NDI7,                   |
| <b>TLPSGCFNTPSIEKP</b>     | Both<br>human and<br>chicken | P11047,                                                                                                                                                   | F1NK49,Q5ZIH4,                          |
| <b>PSMGLVANTK</b>          | Both<br>human and<br>chicken | B4DKS0,B4E106,Q5T8R5,B2R<br>6A5,Q49A45,P53985,                                                                                                            | Q5ZLZ6,                                 |



|                        |                        |                                                                                                                                                                                                                    |                                     |
|------------------------|------------------------|--------------------------------------------------------------------------------------------------------------------------------------------------------------------------------------------------------------------|-------------------------------------|
| <b>DSMIWDCTCIGAGR</b>  | Both human and chicken | P02751,E9PE77,F8W7G7,E9 PG29,E7ERA1,Q7Z391,B7ZLF0,B7ZLE5,Q564H7,Q6MZF4,                                                                                                                                            | F1NJT3,                             |
| <b>AHNQDLGLAGSCLAR</b> | Both human and chicken | E7EPD1,B4DH43,P08572,                                                                                                                                                                                              | F1P2Q3,                             |
| <b>IGGIGTVPVGR</b>     | Both human and chicken | Q504Z0,B4DNE0,Q14222,Q9 NZS6,Q5VTE0,Q53HR1,Q53GE9,A8K9C4,Q8TBL1,P68104Q6IPS9,Q96C29,Q05639,Q6P082,Q53HR5,Q6IPN6,Q6P4C9,Q53HQ7,Q53HM9,Q6IQ15,Q53GA1,Q8IUB0,Q96CD8,Q96RE1,Q53G85,B4E2C5,Q53G89,Q16577,Q6IPT9,Q59GP5, | F1N9H4,Q5ZKM2,Q90835 ,              |
| <b>NTFTESAGAR</b>      | Both human and chicken | D6RGG3,Q99715,                                                                                                                                                                                                     | P13944,F1NKN1,F1NM33,F1NX22,        |
| <b>SICTTVLELLDK</b>    | Both human and chicken | B4DMT8,P27348,E9PG15,                                                                                                                                                                                              | F1NSY6,Q5ZMD1,Q5ZM05 ,              |
| <b>LWAYLTIEQLEK</b>    | Both human and chicken | C9JX84,Q06033,F5H6B4,A8 MXF4,                                                                                                                                                                                      | F1NIE2,F1N8L7,F1NIE3,               |
| <b>LQDLYSIVR</b>       | Both human and chicken | D3DSM5,P39060,Q8NG19,D3DSM4,F5GZA2,F8WDA7,                                                                                                                                                                         | F1NEY6,O93419,F1NW38,               |
| <b>AAYFGIYDTAK</b>     | Both human and chicken | P05141,Q6NVC0,B2RCV1,                                                                                                                                                                                              | F1NFF6,F1NJ10,Q8AYM3,F1NBW8,Q5ZLG7, |
| <b>KIENCNYAVELGK</b>   | Both human and         | Q14651,                                                                                                                                                                                                            | P19179,                             |

|                          |                        |                                                                                                    |                              |
|--------------------------|------------------------|----------------------------------------------------------------------------------------------------|------------------------------|
|                          | chicken                |                                                                                                    |                              |
| <b>LSKDPNIVIAK</b>       | Both human and chicken | P30101,F5H119,B3KQT2,B3KQT9,G5EA52,B4DDM1,                                                         | Q8JG64,                      |
| <b>LGEASDFIVR</b>        | Both human and chicken | O95980,B2RCE6,A8K9D8,                                                                              | F1NYG0,                      |
| <b>AIATLMSDEVFHDIAYK</b> | Both human and chicken | Q9Y6R3,Q9Y6R1,A5JJ20,Q68DB0,                                                                       | E1BWD9,E1BWD6,               |
| <b>YISPDQLADLYK</b>      | Both human and chicken | E2DRY6,P06733,Q96GV1,Q9BT62,                                                                       | F1NZ78,                      |
| <b>DLMVGDEASELR</b>      | Both human and chicken | E9PF41,B4DHK9,P61160,                                                                              | F1NHN5,P53488,F1NRM5,        |
| <b>GDRGDIASQNMRR</b>     | Both human and chicken | B9EJB8,C9JLI9,D6RGG3,A2A2K5,Q99715,                                                                | P13944,F1NKN1,F1NM33,F1NX22, |
| <b>MFVLDEADEMLSR</b>     | Both human and chicken | B4DKP9,A8K088,Q9NZE6,Q14240,Q59F68,B4DNH2,E7EQG2,A8K7F6,B4DJX6,P60842,                             | Q8JFP1,                      |
| <b>AMDfNGILTIR</b>       | Both human and chicken | P98160,                                                                                            | Q6KDZ1,                      |
| <b>TINEVENQILTR</b>      | Both human and chicken | B7TY16,A1L0V1,B7Z565,P12814,B7Z2W3,Q1HE25,B4DFY0,Q96BG6,D6PXX4,B3KUX9,O43707,Q5ZEZ4,F5GXS2,A4K467, | P05094,Q90734,               |
| <b>MDSTANEVEAVK</b>      | Both                   | Q96C96,B3KTQ9,B4DUA5,B4                                                                            | P09102,F1N9H3,               |

|                   |                        |                                                                                                                                                                                                                                                                                                                                                                                                                |                                                                                       |
|-------------------|------------------------|----------------------------------------------------------------------------------------------------------------------------------------------------------------------------------------------------------------------------------------------------------------------------------------------------------------------------------------------------------------------------------------------------------------|---------------------------------------------------------------------------------------|
|                   | human and chicken      | DLN6,B4DNL5,E7EPA8,F5H8J2,P07237,                                                                                                                                                                                                                                                                                                                                                                              |                                                                                       |
| <b>LAVNMVPFPR</b> | Both human and chicken | Q2NKY5,B4DJ43,B7ZAF0,B4DY90,O43209,P04350,B4DXZ5,Q5SQY1,Q9H4B7,B3KS31,F8VUJ7,P68371,Q9BUU9,B2R6L0,Q3ZCM7,Q9BV28,B3KML9,Q8N6N5,Q3ZCR3,Q96HX0,Q9UGA2,F8VW92,Q6LC01,E7ENH1,F5H0I4,C9JAA5,Q5SQY0,Q8IWP6,B2RBD5,B7Z4N1,F5H894,A8K854,B4E052,Q9BVA1,Q13885,B4DFH6,F8VYX6,P07437Q5SU16,Q13509,B4E386,B4DMU8,Q96B85,A6NKZ8,Q53G92,E7EWR1,E7EX69,Q5JP53,B4DE77,B4DP54,A6NNZ2,Q8IZ29,F5H8C9,Q9BUF5,Q5ST81,Q1KSF8,B4DQN9, | P09207,G1K342,F1NMMU4,G1K338,P09244,P32882,P09653,F1NYB1,E1C520,P09203,P09652,P09206, |
| <b>NEALIALLR</b>  | Both human and chicken | Q53FI1,Q59GX5,P13796,                                                                                                                                                                                                                                                                                                                                                                                          | Q5ZLW0,                                                                               |
| <b>VLSIGDGIAR</b> | Both human and chicken | A8K092,P25705,B4DGW3,B4DY56,                                                                                                                                                                                                                                                                                                                                                                                   | F1NI22,Q8UVX3,F1NGA2,                                                                 |
| <b>YLTVAAVFR</b>  | Both human and chicken | B4DJ43,B7ZAF0,B4DY90,P04350,B4DXZ5,F8VUJ7,P68371,Q9BUU9,B3KML9,Q8N6N5,Q96HX0,F8VW92,Q6LC01,E7ENH1,Q8IWP6,F5H894,B7ZAK1,B4E052,B4DFH6,A4UCT2,F                                                                                                                                                                                                                                                                  | G1K342,P09244,F1NYB1,P09206,                                                          |

|                               |                              |                                                                                                                                                                                          |                              |
|-------------------------------|------------------------------|------------------------------------------------------------------------------------------------------------------------------------------------------------------------------------------|------------------------------|
|                               |                              | 8VYX6,P07437Q5SU16,B4D<br>MU8,Q96B85,E7EWR1,Q5JP<br>53,B4DE77,Q8IZ29,Q5ST81,<br>Q1KSF8,                                                                                                  |                              |
| <b>YEINSLIR</b>               | Both<br>human and<br>chicken | Q59FG9,E9PF17,B7Z3R6,P13<br>611,Q6MZK8,                                                                                                                                                  | Q90953,                      |
| <b>YYVTIIDAPGHR</b>           | Both<br>human and<br>chicken | B4DNE0,Q5JR01,Q9NZS6,B4<br>DV42,Q5VTE0,Q53GE9,A8K9<br>C4,P68104Q6IPS9,Q53HR5,F<br>8W6I0,Q6IPN6,Q53HQ7,Q53<br>HM9,Q6IQ15,Q53GA1,Q9H2<br>I7,Q96RE1,Q53G85,A9X7H1,<br>Q16577,A6PW80,Q6IPT9, | Q5ZKM2,Q90835,               |
| <b>AFDITYVR</b>               | Both<br>human and<br>chicken | P11047,Q6NVY8,                                                                                                                                                                           | F1NK49,                      |
| <b>NELESYAYSLK</b>            | Both<br>human and<br>chicken | P11021,                                                                                                                                                                                  | Q90593,                      |
| <b>QVQAEVPGSPIFVMR</b>        | Both<br>human and<br>chicken | B2ZZ90Q13085,                                                                                                                                                                            | F1P5V8,F1NWT0,P11029,        |
| <b>LSKEDIER</b>               | Both<br>human and<br>chicken | B3KTV0,B4E1Q1,Q96IS6,A8K<br>7Q2,P11142,E9PNE6,Q96BE<br>0,E9PKE3,E9PS65,Q53GZ6,E<br>9PM13,Q96H53,                                                                                         | O73885,F1NWP3,F1NRW<br>7,    |
| <b>KDLYANTVLSGGTTMYPGIADR</b> | Both<br>human and<br>chicken | P60709Q1KLZ0,Q9UE89,F5H<br>ON0,Q6PJ43,B4E335,P63261,<br>Q96FU6,B3KWQ3,B4E3A4,Q<br>53G76,A5GZ75,F5GYT4,B7ZA<br>P6,Q96DE1,A4UCT3,F1BXA6,                                                   | P60706,P53478,G1K2Y7,Q5ZMQ2, |

|                           |                        |                                                                                                                                                                                                                                                                                                                                        |                                                                                                                  |
|---------------------------|------------------------|----------------------------------------------------------------------------------------------------------------------------------------------------------------------------------------------------------------------------------------------------------------------------------------------------------------------------------------|------------------------------------------------------------------------------------------------------------------|
|                           |                        | B4DVQ0,Q53G99,Q53GK6,B4DW52,Q8WVW5,                                                                                                                                                                                                                                                                                                    |                                                                                                                  |
| <b>AVFPSIVGRPR</b>        | Both human and chicken | F8WCH0,P60709Q1KLZ0,A5A3E0,B8ZZJ2,B3KUD3,C9JZR7,P0CG38,B7Z6P1,G5E9R0,E7EQV5,B7Z6I1,F5H0N0,B4E335,P63261,C9JFL5,Q6S8J3,Q7Z7J6,E9PG30,A6NL76,B4E3A4,B4E315,Q13707,F5H1C1,Q53G76,P68032,E7EVS6,P63267,A1E282,B4DVQ0,D2JYH4P62736,Q53G99,P68133,F8WB63,C9JTX5,Q5T8M8,C9JUM1,B3KW67,Q5T8M7,A8K3K1,Q53GK6,Q9BYX7,F6UVQ4Q5T9N7,B4DW52,Q8WVW5, | F1N835,P60706,Q5ZLX9,Q90736,P68034,P53478,F1P252,P63270,F1N8P3,G1K2Y7,P08023,F1P2P8,F1P476,P68139,Q5ZMQ2,B5M200, |
| <b>NTGIICTIGPASR</b>      | Both human and chicken | E7EUQ8,B4DNK4,P14618,E9PF79,B4DRT3,                                                                                                                                                                                                                                                                                                    | P00548,F1P4U1,F1NW43,                                                                                            |
| <b>APFDLFENR</b>          | Both human and chicken | P07900,O75322,Q8TBA7,Q2VPJ6,Q86U12,Q96HX7,                                                                                                                                                                                                                                                                                             | P11501,                                                                                                          |
| <b>VAPEEHPVLLTEAPLNPK</b> | Both human and chicken | P60709Q1KLZ0,Q562L9,Q562V5,Q562Z6,G5E9R0,F5H0N0,Q562Y6,B4E335,P63261,Q562P0,Q562N0,B4E3A4,Q53G76,Q562R8,Q562X9,Q562N8,Q562L5,F5GYT4,E7EVS6,A1E282,Q562L6,B4DVQ0,Q562P9,Q53G99,Q562N6,Q562S0,Q562Z4,Q562N4,Q53GK6,Q562U2,B4DW52,Q562Z7,Q                                                                                                | F1N835,P60706,Q5ZLX9,P53478,G1K2Y7,A9YXX3,Q5ZMQ2,                                                                |

|                                             |                        |                                                                                                                                      |                              |
|---------------------------------------------|------------------------|--------------------------------------------------------------------------------------------------------------------------------------|------------------------------|
|                                             |                        | 8WVW5,                                                                                                                               |                              |
| <b>GNLLQCICTGNGR</b>                        | Both human and chicken | P02751,E9PE77,F8W7G7,E9 PG29,E7ERA1,Q7Z391,B7ZLF0,B7ZLE5,Q564H7,Q6MZF4,                                                              | F1NJT3,                      |
| <b>IGFGSFVEK</b>                            | Both human and chicken | P05556,                                                                                                                              | F1N8N7,P07228,               |
| <b>VGYPDWIFLLR</b>                          | Both human and chicken | P53675,A4FU99,Q00610,                                                                                                                | F1NYC4,F1NW23,F1P3J1,        |
| <b>EAESCDCLQGFQLTHSLGGGTGS<br/>GMGTLISK</b> | Both human and chicken | B7ZAF0,B4DY90,P04350,P68371,Q9BUU9,Q8N6N5,F8VW92,Q6LC01,Q8IWP6,B7ZAK1,F8VYX6,P07437Q5SU16,Q5JP53,B4DE77,A6NNZ2,Q8IZ29,Q5ST81,B4DQN9, | G1K342,P09244,F1NYB1,P09206, |
| <b>GDACEGDSGGPFVMK</b>                      | Both human and chicken | P00734,Q69EZ8,Q69EZ7,E9PIT3,B4DDT3,                                                                                                  | F1NXV6,Q91001,               |
| <b>ALMLQGVDLLADAVAVTMGPK</b>                | Both human and chicken | B3GQS7,Q53SE2,C9J0S9,B7Z5E7,C9JCQ4,B7Z712,E7ESH4,E7EXB4,P10809,C9JL25,B7Z597,C9JL19,                                                 | Q5ZL72,                      |
| <b>GTCNYANAYSFWLATIER</b>                   | Both human and chicken | F8WEC9,P02462,Q59F15,A9LSU1,                                                                                                         | Q9I9K3,F1P2R3,F1NA18,        |
| <b>LGFSEVELVQMVVDGVK</b>                    | Both human and chicken | E7EUJ8,P12277,B4DP56,                                                                                                                | P05122,F1NZ30,F1NZ29,        |
| <b>SPAYTLVWTR</b>                           | Both human and         | P98160,                                                                                                                              | Q6KDZ1,                      |

|                          |                        |                                                                                                                                                                                                                                                                                                                                        |                                                                                                                  |
|--------------------------|------------------------|----------------------------------------------------------------------------------------------------------------------------------------------------------------------------------------------------------------------------------------------------------------------------------------------------------------------------------------|------------------------------------------------------------------------------------------------------------------|
|                          | chicken                |                                                                                                                                                                                                                                                                                                                                        |                                                                                                                  |
| <b>HPPEASVQIHQVSR</b>    | Both human and chicken | E7EWM0,C9JD84,Q14766,B7ZLY3,E7EV71,                                                                                                                                                                                                                                                                                                    | F1N9I4,                                                                                                          |
| <b>TFYSCCTEGR</b>        | Both human and chicken | P02751,E9PE77,F8W7G7,E9PG29,E7ERA1,Q7Z391,B7ZLF0,B7ZLE5,Q564H7,Q6MZM7,Q6MZF4,                                                                                                                                                                                                                                                          | F1NJT3,                                                                                                          |
| <b>AHGQDLGTAGSCLR</b>    | Both human and chicken | A7MBN3,P29400,F8WEC9,E7EVY4,E7EQD0,P02462,Q59F15,A9LSU1,                                                                                                                                                                                                                                                                               | Q9I9K3,F1P2R3,F1NA18,F1NDF6,F1NDF5,                                                                              |
| <b>ALESPERPFLAILGGAK</b> | Both human and chicken | B4DHM5,B4E1H9,A8K4W6P00558,B7Z7A9,B4DWQ3,                                                                                                                                                                                                                                                                                              | F1NU17,P51903,                                                                                                   |
| <b>AGFAGDDAPR</b>        | Both human and chicken | F8WCH0,P60709Q1KLZ0,A5A3E0,B8ZZJ2,B3KUD3,C9JZR7,P0CG38,B7Z6P1,G5E9R0,E7EQV5,B7Z6I1,F5H0N0,B4E335,P63261,C9JFL5,Q6S8J3,Q7Z7J6,E9PG30,A6NL76,B4E3A4,B4E315,Q13707,F5H1C1,Q53G76,P68032,E7EVS6,P63267,A1E282,B4DVQ0,D2JYH4P62736,Q53G99,P68133,F8WB63,P0CG39,C9JTX5,Q5T8M8,C9JUM1,B3KW67,Q5T8M7,A8K3K1,Q53GK6,F6UVQ4Q5T9N7,B4DW52,Q8WVW5, | F1N835,P60706,Q5ZLX9,Q90736,P68034,P53478,F1P252,P63270,F1N8P3,G1K2Y7,P08023,F1P2P8,F1P476,P68139,Q5ZMQ2,B5M200, |
| <b>SVTEQGAELSNEER</b>    | Both human and         | E7ESK7,E5RGE1,D0PNI1P63104,E7EVZ2,E7EX29,E5RIR4,E                                                                                                                                                                                                                                                                                      | F1NPX9,Q5ZKC9,                                                                                                   |

|                            |                              |                                                                                                                                                          |                                                              |
|----------------------------|------------------------------|----------------------------------------------------------------------------------------------------------------------------------------------------------|--------------------------------------------------------------|
|                            | chicken                      | 9PD24,Q6LD62,                                                                                                                                            |                                                              |
| <b>EAKKEYHVVIQAK</b>       | Both<br>human and<br>chicken | Q96CZ9,F5H2W2,P55287,B4<br>DMA7,Q59EQ1,                                                                                                                  | O93319,F1P1Y0,                                               |
| <b>DGQVINETSQHDDLE</b>     | Both<br>human and<br>chicken | P08670,Q53HU8,                                                                                                                                           | F1NXT0,Q49MC0,P09654,F1NJ08,                                 |
| <b>AMGIMNSFVNDIFER</b>     | Both<br>human and<br>chicken | Q5QNW6,Q8N257,P23527,B<br>2R4S9P62807,B4DR52,P068<br>99,Q99877,A8K9J7,B4DLA9,<br>P57053,P33778,O60814,Q99<br>879,Q99880,Q16778,Q0D2<br>M2,Q93079,P58876, | P0C1H4,Q9PSW9,F1NCM0,P0C1H3,F1NF31,F1NDN<br>1,               |
| <b>GYSFTTTAER</b>          | Both<br>human and<br>chicken | P60709Q1KLZ0,F5H0N0,Q6P<br>J43,B4E335,P63261,B3KWQ<br>3,B4E3A4,Q53G76,F5GYT4,B<br>7ZAP6,B4DVQ0,Q53G99,Q53<br>GK6,B4DW52,Q8WVW5,                          | F1N835,P60706,Q5ZLX9,P53478,Q0QWA1,G1K2Y7,G4WW42,Q5<br>ZMQ2, |
| <b>IVSNASCTTNCLAPLAK</b>   | Both<br>human and<br>chicken | O14556,                                                                                                                                                  | F1NH87,P00356,F1NK14,                                        |
| <b>YSQFINFPIYVWSSK</b>     | Both<br>human and<br>chicken | Q5CAQ5,Q59FC6,P14625,Q9<br>6GW1,                                                                                                                         | P08110,F1NWB7,Q90WA6,B5AAV6,                                 |
| <b>IIGYTPDLDPETVDDAFAR</b> | Both<br>human and<br>chicken | E9PE45,P08253,B4DWH3,                                                                                                                                    | Q90611,                                                      |
| <b>EQADFAIEALAK</b>        | Both<br>human and<br>chicken | Q86XU5,A8K6E4,B4E3S1,P35<br>579Q60FE2,                                                                                                                   | G1K307,F1NWN3,P14105,E1BXA5,P1058<br>7,                      |
| <b>TNEKVELQELNDR</b>       | Both                         | Q45VM8,Q45VM6,Q549R8,P                                                                                                                                   | Q49MC1,O73665,E1BZ05,P02542,F1NXT0,F1NFH3,P09654,F1NX        |



|                        |                        |                                                                                                    |                                     |
|------------------------|------------------------|----------------------------------------------------------------------------------------------------|-------------------------------------|
|                        | human and chicken      | 17661Q53SB5,P08670,B4DU I0,Q9H319,Q53HU8,Q549R9,Q45VM7,B3KRK8,A5Z217,F5H288,B0YJC4,Q549R7,         | U3,F1NJ08,                          |
| <b>KSFNDDAMLIEK</b>    | Both human and chicken | E9PHF7,B4DHW5,Q68D27,E7ETG7,E9PG35,Q96RQ3,B4DH16,G5E9X5,F5GYT8,B7ZAW3,E7EX16,F5H2T9,               | Q5ZK45,F1NYK3,                      |
| <b>IDTGWLDR</b>        | Both human and chicken | B2ZZ90Q13085,                                                                                      | F1NNT2,F1P5V8,F1NWT0,P11029,Q98909, |
| <b>TVEAEAAHGTVTR</b>   | Both human and chicken | B2R5M8,Q6FIA4,Q6FI37,O75874Q6FHQ6,B4DXS4,Q0QER2,                                                   | F1NPG2,                             |
| <b>VGWEQLLTTIAR</b>    | Both human and chicken | B7TY16,A1L0V1,B7Z565,P12814,B7Z2W3,Q1HE25,B4DFY0,Q96BG6,D6PXX4,B3KUX9,O43707,Q5ZEZ4,F5GXS2,A4K467, | P05094,Q90734,                      |
| <b>GLSCQDCAPGYTR</b>   | Both human and chicken | P98160,                                                                                            | Q6KDZ1,                             |
| <b>YYTSASGDEMVS LK</b> | Both human and chicken | P07900,O75322,Q8TBA7,Q2VPJ6,Q86U12,Q96HX7,                                                         | P11501,                             |
| <b>LGDLYEEEMR</b>      | Both human and chicken | P08670,Q53HU8,B3KRK8,F5H288,B0YJC4,                                                                | Q49MC1,F1NXT0,F1NFH3,P09654,F1NJ08, |
| <b>YLAEVAAGDDKK</b>    | Both human and chicken | B7Z2E6,D0PNI1P63104,E7EX29,E7EX24,B0AZS6,                                                          | F1NPX9,Q5ZKC9,                      |

|                               |                        |                                                                                                                                                                         |                                                                                                                               |
|-------------------------------|------------------------|-------------------------------------------------------------------------------------------------------------------------------------------------------------------------|-------------------------------------------------------------------------------------------------------------------------------|
| <b>SPNDLLALFR</b>             | Both human and chicken | Q92626,                                                                                                                                                                 | F1NN41,                                                                                                                       |
| <b>AVCMLSNTTAAIEAWAR</b>      | Both human and chicken | B4DDU2,B3KT06,Q15670,G3V1U9,A8MUB1,Q9UQM3,Q13748Q1ZYQ1,B4DQK4,E7ET24,Q7Z3M3,B4DN58,B3KPS3,F8VWX4,P68363,Q9NY65,Q71U36,F8VXZ4,Q8WU19,Q6PEY2,P68366,A8JZY9,B3KPW9,C9J2C0, | F1P5B0,P08070,F1NXR6,P09643,F1NUP6,F1NMP5,P02552,F1NN1,F1N9J7,F1N9J7,F1P3N2,F1NMP4,P09642,F1NMP6,F1NW96,F1NRB9,F1P3N4,F1NMP3, |
| <b>LQDEIQNMKEEMAR</b>         | Both human and chicken | P08670,B0YJC5,Q53HU8,B3KRK8,F5H288,B0YJC4,                                                                                                                              | F1NXT0,F1NFH3,Q49MC0,P09654,F1NJ08,                                                                                           |
| <b>FPAGELQKPFVWGTEYPR</b>     | Both human and chicken | B4DWG8,P78562,B4DNS0,B4E334,F5GXU4,                                                                                                                                     | E1BR88,E1BXR4,                                                                                                                |
| <b>GADFQCFQQR</b>             | Both human and chicken | D3DSM5,P39060,Q8NG19,D3DSM4,F5GZA2,F8WDA7,                                                                                                                              | F1NEY6,O93419,F1NW38,                                                                                                         |
| <b>SGETEDTFIADLVVGLCTGQIK</b> | Both human and chicken | F5H0C8,D3DTL2,P09104Q6FHV6,P13929,E2DRY6,P06733,Q96GV1,Q9BT62,B7Z2X9,Q9NPL4,A4QMW8,D3DTL4,                                                                              | F1NG74,P51913,P07322,F1NZ78,                                                                                                  |
| <b>SGEYWIDPNQGCNLDAIK</b>     | Both human and chicken | D3DTX7,P02452,                                                                                                                                                          | P02457,                                                                                                                       |
| <b>LIGQIVSSITASLR</b>         | Both human and chicken | G3V1U9,Q9UQM3,Q13748Q1ZYQ1,F8VQQ4,B4DQK4,Q71U36,F8VXZ4,Q6PEY2,                                                                                                          | F1NUP6,P02552,P09645,F1N9J7,F1NRB9,                                                                                           |
| <b>SDACQGDSGGPLACEK</b>       | Both human and         | Q04756,D6RAR4,                                                                                                                                                          | E1BZN8,                                                                                                                       |

|                                |                        |                                                                                                                                                                 |                                            |
|--------------------------------|------------------------|-----------------------------------------------------------------------------------------------------------------------------------------------------------------|--------------------------------------------|
|                                | chicken                |                                                                                                                                                                 |                                            |
| <b>DITYFIQQLR</b>              | Both human and chicken | Q9P1U1,F5H3P5,P61158Q53 QM2,Q59GD5,Q59FV6,B4DT I0,Q9C0K3,B4DXW1,B7Z9W3 ,C9IZN3,                                                                                 | F1NW48,Q90WDO,                             |
| <b>ITSENPDEGFKPSSGTVQELNFR</b> | Both human and chicken | O00763,F8W8T8,B2ZZ90Q13 085,                                                                                                                                    | F1P5V8,F1NWT0,P11029,                      |
| <b>THINIVVIGHVDSGK</b>         | Both human and chicken | B4DNE0,Q5JR01,Q5VTE0,Q5 3GE9,A8K9C4,P68104Q6IPS9 ,Q05639,Q6NS35,Q53HR5,F 8W6I0,Q6NSH7,Q6IPN6,Q53 HQ7,Q53HM9,E7EPH7,Q6IQ 15,Q53GA1,Q9H2I7,Q53G85 ,A6PW80,Q6IPT9, | F1N9H4,Q6PTX1,Q5ZKM2,Q90835,               |
| <b>DAGTIAGLNVLR</b>            | Both human and chicken | B3KTV0,B4E1Q1,E9PI65,B4D TX2,E9PK54,Q96IS6,E9PQK7, E9PLF4,Q53HF2,P11142,E9P N89,E9PKE3,E9PQQ4,A4D11 1,E7ET08,Q53GZ6,                                            | O73885,F1NWP3,F1NRW 7,                     |
| <b>DPSPLELQDIMTSVSGR</b>       | Both human and chicken | B2ZZ90Q13085,                                                                                                                                                   | F1P5V8,F1NWT0,P11029,                      |
| <b>AVDSLVIPIGR</b>             | Both human and chicken | A8K092,P25705,B4DGW3,B4 DY56,                                                                                                                                   | F1NI22,Q8UVX3,Q9DDH7,Q90ZX4,F1NGA2,Q90ZX5, |
| <b>IAEEFEVELER</b>             | Both human and chicken | P11498,E9PS68,                                                                                                                                                  | Q8JHF6,                                    |
| <b>AILDLEPGTMDSVR</b>          | Both human and chicken | B7ZAF0,B4DY90,E9PBJ4,F8V UJ7,G3V3R4,A5D907,A5D90                                                                                                                | G1K338,P09244,P32882,E1C520,P09203,P09652, |

|                          |                        |                                                                                                                                                                                                                                                                           |                                                                                                    |
|--------------------------|------------------------|---------------------------------------------------------------------------------------------------------------------------------------------------------------------------------------------------------------------------------------------------------------------------|----------------------------------------------------------------------------------------------------|
|                          | chicken                | 6,B2R6L0,Q9BV28,B4DMJ5,F8VW92,Q6LC01,B2RBD5,G3V5W4,Q9BVA1,Q13885,F8VYX6,P07437Q5SU16,Q13509,G3V2R8,G3V2N6,Q53G92,Q5JP53,                                                                                                                                                  |                                                                                                    |
| <b>ALVILAK</b>           | Both human and chicken | Q99497,                                                                                                                                                                                                                                                                   | Q8UW59,D5M8S2,Q6QAZ9,F1N9S7,                                                                       |
| <b>EYQDLLNVK</b>         | Both human and chicken | Q45VM8,Q45VM6,B4DE66,Q549R8,P17661Q53SB5,P08670,P07196,B0YJC5,B3KXJ0,Q9H319,Q53HU8,Q549R9,Q45VM7,Q5RLN2,F8WC76,B3KRK8,B4E192,B4DGN2,A5Z217,Q59EM6,E7ESP9,F5H288,P14136,E7EMV2,E9PAX3,Q8TCR7,B0YJC4,B4DJT7,P12036,Q16352,P07197,B4DR43,A5YM63,A1L194,B4DJW0,E9PBF7,B3KQI5, | F1NUT7,O73665,F1NE70,E1C5R3,P02542,F1NXT0,F1NNY7,F1NFH3,Q49MC0,F1ND22,P09654,P16053,E1BRI6,F1NJ08, |
| <b>IHFPLATYAPVISA EK</b> | Both human and chicken | B4DDU2,B3KT06,G3V1U9,A8MUB1,Q9UQM3,E9PGK3,Q13748Q1ZYQ1,B4DQK4,Q9BQE3,C9JDS9,B3KPS3,F8VVB9,F5H5D3,P68363,Q71U36,F8VXZ4,Q53GA7,Q8WU19,Q6PEY2,B7Z1K5,P68366,                                                                                                                 | F1NXR6,P02552,F1NW97,P09644,F1NXR7,                                                                |
| <b>NAPAIIFIDELDAIAPK</b> | Both human and chicken | P55072,Q96IF9,Q9HAP1,                                                                                                                                                                                                                                                     | Q5ZMU9,                                                                                            |

|                                                |                        |                                                                                                                                                                                       |                                                                                                                  |
|------------------------------------------------|------------------------|---------------------------------------------------------------------------------------------------------------------------------------------------------------------------------------|------------------------------------------------------------------------------------------------------------------|
| <b>LASDLLEWIR</b>                              | Both human and chicken | B4DSX0,B7TY16,Q86TX4,G3V2W4,B7Z565,P12814,Q1HE25,Q96BG6,D6PXX4,E7EV83,O43707,                                                                                                         | P05094,Q9PS32,Q90734,                                                                                            |
| <b>EIIDLVLDR</b>                               | Both human and chicken | B3KT06,Q8N532,G3V1U9,E9PGK3,F8VQQ4,B4DQK4,Q9BQE3,B3KPS3,F8VVB9,F5H5D3,P68363,Q71U36,Q53GA7,F8VRZ4,B7Z1K5,F8VS66,A8JZY9,                                                               | F1NXR6,P02552,F1NXR7,                                                                                            |
| <b>AQLGVQAFADALLIIPK</b>                       | Both human and chicken | A1JUI8,P40227,A6NCD2,B4DPJ8,B2R9K8,B4DN39,Q59ET3,                                                                                                                                     | F1NWH9,Q5ZJ54,                                                                                                   |
| <b>TFCQLILDPIFK</b>                            | Both human and chicken | F5GZG3,Q6PK56,B4DMC6,P13639,F5H370,B4DRE8,                                                                                                                                            | B4ZAD9,F1NFS0,Q90705,D5G0G8,                                                                                     |
| <b>IMGPNYTPGK</b>                              | Both human and chicken | F5GZG3,Q8TA90,Q6PK56,P13639,F5H370,B4DRE8,                                                                                                                                            | F1NFS0,Q90705,                                                                                                   |
| <b>VEYELSEEGDEPQYLDLPSTATSV<br/>NIPDLLPGRK</b> | Both human and chicken | P02751,E9PE77,F8W7G7,E7ERA1,B7ZLF0,B7ZLE5,Q6MZM7,Q6MZF4,                                                                                                                              | F1NJT3,                                                                                                          |
| <b>FDGALNVDLTEFQTNLVPYPR</b>                   | Both human and chicken | B4DDU2,B3KT06,G3V1U9,A8MUB1,Q9UQM3,Q13748Q1ZYQ1,B4DQK4,Q7Z3M3,Q9BQE3,C9JDS9,B3KPS3,F8VVB9,F5H5D3,P68363,Q9NY65,Q71U36,F8VXZ4,Q53GA7,Q8WU19,Q6PEY2,B7Z1K5,P68366,A8JZY9,B3KPW9,C9J2C0, | F1NXR6,P09643,F1NUP6,F1NMP5,P02552,F1NKN1,F1NW97,P09644,F1NXR7,P09645,F1N9J7,F1P3N2,F1NMP6,F1NW96,F1NRB9,F1NMP7, |
| <b>VLTWESGMR</b>                               | Both human and chicken | B9EJB8,C9JLI9,D6RGG3,Q99715,                                                                                                                                                          | P13944,F1NKN1,F1NM33,F1NX22,                                                                                     |

|                                |                        |                                                                                                                     |                                                           |
|--------------------------------|------------------------|---------------------------------------------------------------------------------------------------------------------|-----------------------------------------------------------|
|                                | chicken                |                                                                                                                     |                                                           |
| <b>ISVYYNEATGGK</b>            | Both human and chicken | B7ZAF0,B4DY90,E9PBJ4,F8V UJ7,B4DMJ5,F8VW92,Q6LC0 1,F8VYX6,P07437Q5SU16,B4 DMU8,Q5JP53,                              | P09244,                                                   |
| <b>VNQIGSVTESLQACK</b>         | Both human and chicken | E2DRY6,P06733,Q96GV1,Q9 BT62,A4QMW8,                                                                                | P51913,F1NZ78,                                            |
| <b>VVLAYEPVWAIGTGK</b>         | Both human and chicken | P60174,Q2QD09,B7Z5D8,Q5 3HE2,B4DUI5,                                                                                | P00940,                                                   |
| <b>ADIVFLTDASWSIGDDNFNK</b>    | Both human and chicken | B9EJB8,C9JLI9,D6RGG3,Q99 715,                                                                                       | P13944,F1NKN1,F1NM33,F1NX22,                              |
| <b>LQVEHPVTECITGLDLVQEMIR</b>  | Both human and chicken | B4DPF9,C9JPQ8,B2RDE0,P05 165,                                                                                       | E1BR16,F1POM2,                                            |
| <b>WLPAGDALLQMITIHLPSVTAQK</b> | Both human and chicken | F5GZG3,Q8TA90,Q6PK56,B4 DMC6,P13639,F5H370,B4DR E8,                                                                 | B4ZAD9,F1NFS0,Q90705,                                     |
| <b>GLFDEYGSK</b>               | Both human and chicken | Q58FF3,Q5CAQ5,Q58FF2,B4 DHT9,E9PEX3,Q59FC6,B4DU 71,P14625,                                                          | F1NWB6,Q9PSP5,P08110,F1NWB7,B5AA V6,                      |
| <b>GYSFVTTAER</b>              | Both human and chicken | B3KUD3,B7Z6P1,B3KPP5,E9P G30,B4E315,Q13707,F5H1C1 ,P68032,P63267,D2JYH4P62 736,P68133,B3KW67,Q5T8 M7,A8K3K1,B4DUI8, | P68034,F1NDV5,P63270,F1N8P3,P08023,F1P2P8,F1P476,P6813 9, |
| <b>DQVANSAFVER</b>             | Both human and chicken | P07900,O75322,Q8TBA7,Q2 VPJ6,Q86U12,Q96HX7,                                                                         | P11501,                                                   |

|                       |                        |                                                                                                                                                                                                                                                                                        |                                                                                                           |
|-----------------------|------------------------|----------------------------------------------------------------------------------------------------------------------------------------------------------------------------------------------------------------------------------------------------------------------------------------|-----------------------------------------------------------------------------------------------------------|
| <b>HQGVMVGMGQK</b>    | Both human and chicken | P60709Q1KLZ0,B8ZZJ2,B3KU D3,C9JZR7,B7Z6P1,G5E9R0,E7EQV5,B7Z6I1,F5H0N0,B4E335,P63261,C9JFL5,Q7Z7J6,A6NL76,B4E3A4,Q13707,F5H1C1,Q53G76,P68032,E7EVS6,P63267,A1E282,B4DVQ0,D2JYH4P62736,Q53G99,P68133,F8WB63,C9JTX5,Q5T8M8,C9JUM1,B3KW67,Q5T8M7,A8K3K1,Q53GK6,Q562R1,F6UVQ4Q5T9N7,Q8WVW5, | F1N835,P60706,Q5ZLX9,Q90736,P68034,P53478,F1P252,P63270,F1N8P3,G1K2Y7,P08023,F1P2P8,P68139,Q5ZMQ2,B5M200, |
| <b>LTLLQLQHNQIK</b>   | Both human and chicken | A8K2P0,Q8N6Y2,                                                                                                                                                                                                                                                                         | Q9DEQ5,                                                                                                   |
| <b>DLPPDTLLDLQNNK</b> | Both human and chicken | F8VWU0,F8VUF6,F8VXZ8,P07585Q6FH10,F8VX58,                                                                                                                                                                                                                                              | E1BQ80,P28675,E1BRE9,                                                                                     |
| <b>HTNYTMEHIR</b>     | Both human and chicken | B7TY16,B2RCS5,A1L0V1,B7Z565,P12814,B7Z4P8,B7Z4P6,B7Z2W3,Q1HE25,B4DFY0,Q96BG6,D6PXX4,B3KUX9,O43707,P35609,Q5ZEZ4,B7Z2N5,F5GXS2,B7Z4K1,A4K467,Q59FD9,                                                                                                                                    | P05094,P20111,Q90734,                                                                                     |
| <b>LHSDIDSGDGNK</b>   | Both human and chicken | Q96CZ9,F5H2W2,B7Z2M1,P55287,B4DMA7,Q59EQ1,F5H7U9,                                                                                                                                                                                                                                      | O93319,F1P1Y0,                                                                                            |
| <b>IEDPYSPR</b>       | Both human and chicken | E7EPA6,G3XAI2,P07942,                                                                                                                                                                                                                                                                  | F1NUC1,Q01635,F1NJ23,                                                                                     |

|                          |                        |                                                                                                                                                                                                                                                                                               |                                                                                      |
|--------------------------|------------------------|-----------------------------------------------------------------------------------------------------------------------------------------------------------------------------------------------------------------------------------------------------------------------------------------------|--------------------------------------------------------------------------------------|
| <b>GKTEQQTADQLLAR</b>    | Both human and chicken | P11047,                                                                                                                                                                                                                                                                                       | F1NK49,                                                                              |
| <b>ITENIGCVMTGMTADSR</b> | Both human and chicken | G3V5Z7,B4DXJ9,G3V295,G3V3I1,P60900,                                                                                                                                                                                                                                                           | F1NEQ6,                                                                              |
| <b>EEAISNMVVALK</b>      | Both human and chicken | O00763,F8W8T8,B2ZZ90Q13085,                                                                                                                                                                                                                                                                   | F1NNT2,F1P5V8,F1NWT0,F1NH15,F1P1B5,P11029,Q98909,                                    |
| <b>DFLAGGVAAAISK</b>     | Both human and chicken | P05141,Q6NVC0,B2RCV1,                                                                                                                                                                                                                                                                         | Q5ZMJ6,Q5ZLG7,                                                                       |
| <b>EITALAPSTMK</b>       | Both human and chicken | P60709Q1KLZ0,B3KUD3,B7Z6P1,E7EQV5,Q9UE89,F5H0N0,Q6PJ43,B4E335,P63261,Q96FU6,B3KPP5,Q7Z7J6,E9PG30,B3KWQ3,A6NL76,B4E3A4,B4E315,Q13707,F5H1C1,Q53G76,A5GZ75,F5GYT4,B7ZAP6,Q96DE1,A4UCT3,P68032,F1BXA6,P63267,B4DVQ0,D2JYH4P62736,Q53G99,P68133,Q5T8M8,Q5T8M7,A8K3K1,Q53GK6,B4DW52,B4DUI8,Q8WVW5, | P60706,P68034,F1NDV5,P53478,P63270,F1N8P3,G1K2Y7,P08023,F1P2P8,F1P476,P68139,Q5ZMQ2, |
| <b>MALDIEIATYR</b>       | Both human and chicken | P08670,B0YJC5,Q53HU8,B3KRK8,F5H288,P41219,B0YJC4,B3KWQ6,                                                                                                                                                                                                                                      | F1NXT0,F1NFH3,Q49MC0,P09654,F1NJ08,                                                  |
| <b>LSELHAYILR</b>        | Both human and chicken | Q1W6G9,P02008,                                                                                                                                                                                                                                                                                | P02007,                                                                              |



|                             |                        |                                                                                             |                                                   |
|-----------------------------|------------------------|---------------------------------------------------------------------------------------------|---------------------------------------------------|
| <b>GYDVIAQAQSGTGK</b>       | Both human and chicken | B4E047,A8K088,Q14240,B4E102,Q59F68,E7EQG2,A8K7F6,P60842,Q86WD0,E7EMV8,                      | Q8JFP1,                                           |
| <b>PGNWILER</b>             | Both human and chicken | A6NF00,P25391,F8WAH5,A6NGS5,P24043,                                                         | Q91429,F1N8P9,F1NM44,F1NM47,Q90ZN2,F1P420,        |
| <b>NAGVEGSLIVEK</b>         | Both human and chicken | B3GQS7,B7Z5E7,P10809,B7Z597,B7Z4F6,                                                         | Q5ZL72,                                           |
| <b>VNQIGSVTESIQACK</b>      | Both human and chicken | D3DTL2,P13929,Q9NPL4,D3DTL4,                                                                | P07322,                                           |
| <b>GSFSEQGINEFLR</b>        | Both human and chicken | B7Z4M8,B3KY95,B7Z254,F8WA83,Q15084Q53RC7,B5MCQ5,                                            | F1NK96,                                           |
| <b>GEWTCAIYSQLR</b>         | Both human and chicken | P02751,E9PE77,F8W7G7,E9PG29,E7ERA1,Q7Z391,B7ZLF0,B7ZLE5,Q564H7,Q6MZM7,Q6MZF4,               | F1NJT3,                                           |
| <b>VEQVPIVDIMFNDFGEASQK</b> | Both human and chicken | F2Z359,Q96HC0,B2ZZ86,Q59EE7,P20908,                                                         | F1NR02,Q9IAU4,F1NR03,Q90689,F1NR01,F1NI79,F1NR10, |
| <b>FTQAGSEVSALLGR</b>       | Both human and chicken | Q0QEN7,P06576,F8W0P7,                                                                       | Q5ZLC5,                                           |
| <b>LAYVYQNNIYLK</b>         | Both human and chicken | Q12884,B4DLR2,B2RD89,C9J131,                                                                | F1NDP3,                                           |
| <b>MSATFIGNSTAIQELFK</b>    | Both human and chicken | O43209,P68371,B2R6L0,B3KML9,Q8N6N5,Q96HX0,Q9UGA2,B7Z4N1,Q9BVA1,Q13885,E7EX69,Q8IZ29,F5H8C9, | G1K342,G1K338,P32882,F1NYB1,E1C520,P09203,P09206, |

|                                      |                        |                                                                                                                                                     |                                                                 |
|--------------------------------------|------------------------|-----------------------------------------------------------------------------------------------------------------------------------------------------|-----------------------------------------------------------------|
| <b>SFFSEIISISDVK</b>                 | Both human and chicken | Q6PEG1,Q66LE6,A8MZB4,Q00005,F5GXJ6,Q9NZ48,Q6IN90,G3V149,E5RFR9,Q56VW8,P63151,B4E1T7,Q6ZP32,                                                         | F1NBJ2,F1NNN2,Q5ZLP4,F1NS69,Q8AWE3,Q5ZIJ5,F1NS72,               |
| <b>LVSWYDNEFGYSNR</b>                | Both human and chicken | Q16768,                                                                                                                                             | F1NH87,P00356,F1NK14,                                           |
| <b>TLTIVDTGIGMTK</b>                 | Both human and chicken | G3V2J8,P07900,Q14568,Q86SX1,Q2VPJ6,Q58FG1,B4DTA5,                                                                                                   | F1NKM6,P11501,Q2XQE5,F1NKM8,Q5ZMA5,Q5ZKZ3,Q5ZIC0,F1NVN4,F1NKM3, |
| <b>ECYCPPDFPSALYCDSR</b>             | Both human and chicken | P51888Q6FG38,Q6FHG6,                                                                                                                                | E1C7T4,                                                         |
| <b>MADEAVCVGPAPTSK</b>               | Both human and chicken | B4DPF9,C9JPQ8,B2RDE0,P05165,                                                                                                                        | E1BR16,F1P0M2,                                                  |
| <b>AKFEELNMDLFR</b>                  | Both human and chicken | P11021,                                                                                                                                             | Q90593,                                                         |
| <b>AVFVDLEPTVIDEVR</b>               | Both human and chicken | B3KT06,F8VX09,Q8N532,G3V1U9,E9PGK3,F8VQQ4,Q9BQE3,B4DN58,B3KPS3,F8VVB9,F5H5D3,P68363,Q71U36,F8VWV9,Q53GA7,Q8WU19,F8VRZ4,B7Z1K5,F8VS66,F8VRK0,A8JZY9, | P02552,                                                         |
| <b>DGNASGTTLLEALDCILPPTRPTD KPLR</b> | Both human and chicken | Q504Z0,B4DNE0,B4DV42,Q5VTE0,Q53HR1,Q53GE9,A8K9C4,Q8TBL1,P68104Q6IPS9,Q96C29,Q6P082,Q53HR5,F8W6I0,Q6IPN6,Q6P4C9,Q53HQ7,Q53HM9,Q6IQ15,Q53GA1,         | Q5ZKM2,Q90835,                                                  |

|                                       |                        |                                                                                                                                                                                                                   |                                                   |
|---------------------------------------|------------------------|-------------------------------------------------------------------------------------------------------------------------------------------------------------------------------------------------------------------|---------------------------------------------------|
|                                       |                        | Q8IUB0,Q96CD8,Q9H2I7,Q96RE1,Q53G85,Q53G89,Q6IPT9,                                                                                                                                                                 |                                                   |
| <b>YQCYCYGR</b>                       | Both human and chicken | P02751,E9PE77,F8W7G7,E9PG29,E7ERA1,Q7Z391,B7ZLF0,B7ZLE5,Q564H7,Q6MZM7,Q6MZF4,                                                                                                                                     | F1NJT3,F1NJT4,P11722,                             |
| <b>TTGIVMDSGDGVTHTVPIYEGYALPHAILR</b> | Both human and chicken | P60709Q1KLZ0,Q562L9,Q562Z6,Q562M3,Q562Y6,Q6PJ43,P63261,Q562M5,Q562P0,Q562N0,B3KWQ3,B4E3A4,Q53G76,Q562R8,Q562X9,Q562N8,Q562L5,F5GYT4,B7ZAP6,Q562N2,Q562Y8,Q53G99,Q562S0,A0AUL6,Q53GK6,Q562U2,B4DW52,Q562Z7,Q8WVW5, | F1N835,P60706,Q5ZLX9,P53478,Q0QWA1,G1K2Y7,Q5ZMQ2, |
| <b>LEHLYLNNNSIEK</b>                  | Both human and chicken | Q7Z4B2,P51888Q6FG38,Q6FHG6,                                                                                                                                                                                       | E1C7T4,                                           |
| <b>ITVVGVGQVGMACAISILGK</b>           | Both human and chicken | P07195Q5U077,C9J7H8,F5H793,A8MW50,                                                                                                                                                                                | P00337,                                           |
| <b>FEELNADLFR</b>                     | Both human and chicken | B3KTV0,B4E1Q1,Q96IS6,A8K7Q2,Q53HF2,P54652,P11142,E9PNE6,E9PN89,E9PKE3,E7ET08,B3KUS2,Q53GZ6,                                                                                                                       | Q7SX63,P08106,D6PVB7,B6EAX2,F1NWP3,F1NRW7,B3VHV2, |
| <b>NSLESYAFNMK</b>                    | Both human and chicken | B3KTV0,B4E1Q1,Q9NWW3,Q96IS6,A8K7Q2,P11142,E9PNE6,Q96BE0,E9PKE3,E9PS65,Q9NZ87,Q53GZ6,E9PM13,Q96H53,                                                                                                                | F1NWP3,F1NRW7,                                    |

|                               |                        |                                                                                                                               |                                                          |
|-------------------------------|------------------------|-------------------------------------------------------------------------------------------------------------------------------|----------------------------------------------------------|
| <b>DRDLEVDTTLK</b>            | Both human and chicken | D3DTX7,P02452,                                                                                                                | P02457,                                                  |
| <b>RVIISAPSADAPMFVMGVNHEK</b> | Both human and chicken | Q0QET7,A4UCT1,E7EUT4,P04406,E7EUT5,B4DRV9,E7EU54,                                                                             | F1NH87,P00356,F1NK14,                                    |
| <b>VIGSGCNLDSAR</b>           | Both human and chicken | E9PH51,F5H245,P00338,Q96L19,F5H155,Q6ZMR3,P07195Q5U077,G3XAP5,F5H308,D6NKH9,P07864,A8MXQ4,A8MW50,F8W819,B4DKQ2,F5H5G7,B4DJI1, | P00340,F1NW35,E1BTT8,                                    |
| <b>IPAFLNVVDIAGLVK</b>        | Both human and chicken | Q53SW9,C9JTK6,D7EHM2Q9NTK5,B4DK14,                                                                                            | Q5ZM25,                                                  |
| <b>QLLQANPILEAFGNAK</b>       | Both human and chicken | F2Z2U9,G8JLL9,F2Z2U8,Q86XU5,Q7Z406,F2Z2S7,D2JYH7P35749,Q3MNF1,A8K6E4,Q3MIV8,Q3MNF0,B1PS43,B4E3S1,P35579Q60FE2,                | G1K307,F1NWN3,P14105,F1NXC9,E1BXA5,P10587,Q7LZ83,        |
| <b>SLETAMSFVAR</b>            | Both human and chicken | B7ZMJ7,E9PFQ6,D9ZGF2P12111,B7ZW00,Q59F25,E7EVT9,E7ENL6,E9PCV6,Q8N4Z1,                                                         | F1P2F0,P15989,                                           |
| <b>WVGGPEIELIAIATGGR</b>      | Both human and chicken | A8K2X8,E9PCA1,B4DE30,E7EWW2,B4DZT5,B7ZAR1,B4DX08,P48643,B4DZY9,B4DYD8,B4DYC8,Q9BU08,E7ENZ3,B4DXI1,B4DDU6,Q96GI1,              | Q5F411,F1NKN0,                                           |
| <b>EVDEQMLNVQNK</b>           | Both human and chicken | B7ZAF0,B4DY90,O43209,B4DXZ5,E9PBJ4,F8VUJ7,P68371,Q9BUU9,B2R6L0,B3KML9,B4DMJ5,Q8N6N5,Q96HX0,Q9                                 | G1K342,G1K338,P09244,P32882,F1NYB1,E1C520,P09203,P09206, |

|                           |                              |                                                                                                                                                                                                                                                                                                                                                                         |                                                              |
|---------------------------|------------------------------|-------------------------------------------------------------------------------------------------------------------------------------------------------------------------------------------------------------------------------------------------------------------------------------------------------------------------------------------------------------------------|--------------------------------------------------------------|
|                           |                              | UGA2,F8VW92,Q6LC01,E7E<br>NH1,Q6P602,Q8IWP6,B7Z4N<br>1,F5H894,B7ZAK1,B4E052,Q<br>9BVA1,Q13885,A4UCT2,F8V<br>YX6,P07437Q5SU16,B4DMU<br>8,Q96B85,E7EWR1,E7EX69,<br>Q5JP53,Q8IZ29,F5H8C9,Q5S<br>T81,Q1KSF8,B4DQN9,                                                                                                                                                         |                                                              |
| <b>LFIGGLSFETTDESLR</b>   | Both<br>human and<br>chicken | F8W646,Q6IPF2,P09651,Q0<br>VAC0,F8VSB5,F8VXY0,B4DP3<br>5,F8W1S7,F8VTQ5,Q32P51,F<br>8VZ49,F8VRQ1,B4E0B5,F8W<br>6I7,                                                                                                                                                                                                                                                      | Q5ZLB3,                                                      |
| <b>FLGSNDEEMSYDNNPYIR</b> | Both<br>human and<br>chicken | F2Z359,Q5JR39,Q96HCO,B2Z<br>Z86,Q59EE7,P20908,                                                                                                                                                                                                                                                                                                                          | F1NR02,Q9IAU4,F1NR03,Q90689,F1NR01,F1NI79,F1NR10,            |
| <b>RLLLVGAPR</b>          | Both<br>human and<br>chicken | P23229,G5E9H1,C9JK10,                                                                                                                                                                                                                                                                                                                                                   | P26007,                                                      |
| <b>TTPSYVAFTDTER</b>      | Both<br>human and<br>chicken | B3KTV0,E9PI65,B2RCQ9,B4E<br>3B6,B4DTX2,B4DFN9,B4DNV<br>4,B4DWK5,E9PK54,Q59EJ3,E<br>9PQK7,B4E1T6,E9PLF4,P170<br>66,B2R6X5,Q53HF2,P54652,<br>C9IYI3,Q53FA3,P11142,E9PN<br>E6,B4DI39,F8WEE3,Q53FC7,<br>E9PKE3,B4DI54,F8W1P1,A8K<br>5I0P08107,B4DXY3,B3KSM6,<br>F8VZJ4,B4DNT8,E7EP11,B4D<br>NX1,E9PQQ4,P48741,E7ET0<br>8,E9PN25,F5GZ62,P34931,B<br>3KUS2,Q53GZ6,E9PPY6,F5H1 | Q7SX63,P08106,O73885,Q7ZSX8,B6EAX2,F1NWP3,F1NRW7,B3V<br>HV2, |

|                                  |                        |                                                                                                |                                            |
|----------------------------------|------------------------|------------------------------------------------------------------------------------------------|--------------------------------------------|
|                                  |                        | D3,E7EQL7,                                                                                     |                                            |
| <b>NSVSNFLHSLER</b>              | Both human and chicken | B2ZZ90Q13085,                                                                                  | F1NNT2,F1P5V8,F1NWT0,P11029,Q98909,        |
| <b>KIGVLITDGK</b>                | Both human and chicken | B9EJB8,C9JLI9,A2A2K4,D6RG G3,Q99715,                                                           | P13944,F1NKN1,F1NM33,F1NX22,               |
| <b>FDEFFKELLENAEK</b>            | Both human and chicken | F5H5T3,Q86SV6,O75487,B4E 2C0,                                                                  | F1NAU1,                                    |
| <b>TLRDPSLPLELQDIMTSVSGR</b>     | Both human and chicken | B2ZZ90Q13085,                                                                                  | F1P5V8,F1NWT0,P11029,                      |
| <b>IEVIEIMTDR</b>                | Both human and chicken | Q6IPF2,P09651,Q0VAC0,F8V SB5,F8VXY0,F8VYN5,F8W1S 7,F8VTQ5,Q32P51,F8VZ49,F 8VRQ1,Q9BSM5,F8W6I7, | Q5ZLB3,                                    |
| <b>IAWDDEETR</b>                 | Both human and chicken | B4DPF9,C9JPQ8,B2RDE0,P05 165,                                                                  | E1BR16,F1POM2,                             |
| <b>AINQGGLTSVAVR</b>             | Both human and chicken | G3V5Z7,B4DXJ9,Q9BZ93,G3 V3U4,G3V295,G3V3I1,P6090 0,                                            | F1NEQ6,                                    |
| <b>LHTLGDNLLDSR</b>              | Both human and chicken | E7EPA6,G3XAI2,P07942,                                                                          | F1NUC1,Q01635,F1NJ23,E1C700,O57484,F1NX80, |
| <b>VIHDNFGIVEGLMTTVHAITATQ K</b> | Both human and chicken | Q2TSD0,Q0QET7,A4UCT1,E7 EUT4,P04406,E7EUT5,                                                    | F1NH87,P00356,F1NK14,                      |
| <b>GCITIIGGGDTATCCA K</b>        | Both human and chicken | B4DHB3,B4DHM5,B4E1H9,A 8K4W6P00558,B7Z7A9,B4D                                                  | F1NU17,P51903,                             |

|                            |                              |                                                                                                                                                                                                                                            |                                                                                                 |
|----------------------------|------------------------------|--------------------------------------------------------------------------------------------------------------------------------------------------------------------------------------------------------------------------------------------|-------------------------------------------------------------------------------------------------|
|                            | chicken                      | WQ3,E7ERH5,                                                                                                                                                                                                                                |                                                                                                 |
| <b>VTITLTDVNDNPPK</b>      | Both<br>human and<br>chicken | F5H2W2,P55287,B4DMA7,Q<br>59EQ1,                                                                                                                                                                                                           | F1NZZ6,A9Y0H0,A9Y0G9,A6YJX2,O93319,F1P1Y0,                                                      |
| <b>VMILITDGK</b>           | Both<br>human and<br>chicken | D6RGG3,Q99715,                                                                                                                                                                                                                             | P13944,F1NKN1,F1NM33,F1NX22,                                                                    |
| <b>VGINYQPPTVVPGGDLAK</b>  | Both<br>human and<br>chicken | B4DDU2,B3KT06,Q8N532,G3<br>V1U9,A8MUB1,Q9UQM3,E9<br>PGK3,Q13748Q1ZYQ1,B4DQ<br>K4,E7ET24,Q7Z3M3,Q9BQE3<br>,B4DN58,B3KPS3,F8VWX4,F5<br>H5D3,P68363,Q9NY65,Q71U<br>36,F8VXZ4,Q53GA7,Q8WU1<br>9,Q6PEY2,B7Z1K5,P68366,A<br>8JZY9,B3KPW9,C9J2C0, | F1P5B0,F1NXR6,F1NUP6,P02552,F1NW97,F1NXR7,P09645,F1N9<br>J7,F1P3N2,P09642,F1NW96,F1NRB9,F1P3N4, |
| <b>VTDALNATR</b>           | Both<br>human and<br>chicken | B3GQS7,B7Z5E7,P10809,B7Z<br>597,B7Z4F6,                                                                                                                                                                                                    | Q5ZL72,                                                                                         |
| <b>VGGTSDVEVNEK</b>        | Both<br>human and<br>chicken | B3GQS7,B7Z5E7,P10809,B7Z<br>597,B7Z4F6,                                                                                                                                                                                                    | Q5ZL72,                                                                                         |
| <b>TAFDEAIAELDTLSEESYK</b> | Both<br>human and<br>chicken | B7Z2E6,Q2F831,D0PNI1P631<br>04,E7EX29,E7EX24,B7Z465,B<br>0AZS6,                                                                                                                                                                            | Q9PS14,Q5ZKC9,                                                                                  |
| <b>GQETSTNPIASIFAWTR</b>   | Both<br>human and<br>chicken | B2R5M8,Q6FIA4,Q6FI37,O75<br>874Q6FHQ6,Q567U4,B4DXS<br>4,Q0QER2,                                                                                                                                                                            | F1NPG2,                                                                                         |
| <b>YTCIAGNSCNK</b>         | Both<br>human and<br>chicken | Q59FV9,B7Z477,E9PFZ5,Q13<br>308,                                                                                                                                                                                                           | F1NLV8,Q91048,                                                                                  |

|                                          |                              |                                                                                                                                                                            |                                         |
|------------------------------------------|------------------------------|----------------------------------------------------------------------------------------------------------------------------------------------------------------------------|-----------------------------------------|
| <b>CPEALFQPSFLGMESCGIHETTFN<br/>SIMK</b> | Both<br>human and<br>chicken | P60709Q1KLZ0,F5H0N0,Q6P<br>J43,B4E335,P63261,Q96FU6,<br>B3KWQ3,B4E3A4,Q53G76,A<br>5GZ75,F5GYT4,B7ZAP6,Q96<br>DE1,A4UCT3,F1BXA6,B4DVQ<br>0,Q53G99,Q53GK6,B4DW52,<br>Q8WVW5, | P60706,Q5ZMQ2,                          |
| <b>SLSQQIENIR</b>                        | Both<br>human and<br>chicken | D3DTX7,P02452,                                                                                                                                                             | P02457,                                 |
| <b>IGLFGGAGVGK</b>                       | Both<br>human and<br>chicken | Q0QEN7,P06576,F8VPV9,F8<br>W079,                                                                                                                                           | Q5ZLC5,                                 |
| <b>GPAVGIDLGTTYSCVGVFQH GK</b>           | Both<br>human and<br>chicken | B3KTV0,E9PI65,B4DTX2,E9P<br>K54,E9PQK7,E9PLF4,Q53HF2<br>,P11142,E9PNE6,E9PKE3,E9P<br>QQ4,E9PSH5,E7ET08,E9PN2<br>5,Q53GZ6,E9PPY6,                                           | O73885,F1NWP3,F1NRW<br>7,               |
| <b>LNTFGDEVFN DPK</b>                    | Both<br>human and<br>chicken | P11047,                                                                                                                                                                    | F1NI05,F1NK49,Q90ZN3,                   |
| <b>GDLENAFLNLVQCIQNK</b>                 | Both<br>human and<br>chicken | B3KRQ1,P07355,                                                                                                                                                             | P17785,                                 |
| <b>LCYVALDFEQEMATAASSSSLEK</b>           | Both<br>human and<br>chicken | P60709Q1KLZ0,F5H0N0,Q6P<br>J43,B4E335,P63261,Q96FU6,<br>Q6S8J3,B3KWQ3,B4E3A4,Q5<br>3G76,A5GZ75,F5GYT4,B7ZAP<br>6,A4UCT3,G8FSY7,B4DVQ0,<br>Q53G99,Q53GK6,B4DW52,Q<br>8WVW5, | P60706,P53478,G1K2Y7,G4WW42,Q5ZM<br>Q2, |



|                         |                        |                                                                                                                                                                                                                               |                                                                        |
|-------------------------|------------------------|-------------------------------------------------------------------------------------------------------------------------------------------------------------------------------------------------------------------------------|------------------------------------------------------------------------|
| <b>LEQEIATYR</b>        | Both human and chicken | A8MT21,P08779,F5GWP8,Q8N1A0,Q13092,B3KRA2,P02533,Q14666,P13646,P19012,B3KVF5,B4DE59,A1A4E9,P08727,Q04695,P35900,A8K2H9,B4DL17,                                                                                                | Q6PVZ1,O93256,F1NPR7,F1NDP0,F1NDN9,F1NDN5,Q6PVZ2,                      |
| <b>IGFPWSEIR</b>        | Both human and chicken | B2R6J2,Q9UJU1,Q6NUR7,Q9UJZ7,B0YJ88P35241,B7Z2S7,Q05CU6,B7Z9U6,A7YIJ8,P26038,B7Z437,Q6PJT4,B7Z5V2,F5H1A7,P15311,E7EQR4,Q9UJZ6,Q9UK20,Q9UJZ2,Q6PKD3,                                                                            | F1P3H9,F1P0I4,Q9YGW6,Q9PU45,F1NQD9,E1BV34,                             |
| <b>GLGTDEDTLIEILASR</b> | Both human and chicken | B4DL19,B5BU38,Q5T3N1,P04083Q5TZZ9,                                                                                                                                                                                            | Q6QAZ9,F1N9S7,                                                         |
| <b>QVLIASHLPSYELR</b>   | Both human and chicken | B2ZZ90Q13085,                                                                                                                                                                                                                 | F1P5V8,F1NWT0,F1NH15,F1P1B5,P11029,                                    |
| <b>TITLEVEPSDTIENVK</b> | Both human and chicken | F5GXX7,Q49A90,P62987Q3MIH3,F5GYU3,F5H747,F5H6Q2,Q59EM9,Q9UFQ0,F5GZ39,F5H4D8,F5GYX6,F5H265,Q96C32,P0CG48,Q96MH4,Q66K58,F5H2Z3,F5H041,F5H388,B2RDW1P62979,A8K674,Q5PY61,Q5RKT7,F5H7Y5,P0CG47Q5U5U6,B4DV12,Q5UGI3,F5H7K6,Q96H31, | Q91021,P0CG62,P79781,F1NAV4,F1P0H6,F1NGE3,F2Z4K9,F1P0H5,Q9PST8,F1NGE2, |
| <b>IENVVTTFAPNR</b>     | Both human and chicken | E7EPA6,G3XAI2,P07942,                                                                                                                                                                                                         | F1NUC1,Q01635,F1NJ23,                                                  |

|                            |                              |                                                                                                                                                                                                 |                                                                            |
|----------------------------|------------------------------|-------------------------------------------------------------------------------------------------------------------------------------------------------------------------------------------------|----------------------------------------------------------------------------|
| <b>NEALAALLR</b>           | Both<br>human and<br>chicken | Q53GY0,B7Z6M1,A8K579P1<br>3797,F8W8D8,B4DGB4,B4DP<br>W9,Q96HI1,                                                                                                                                 | Q5ZI39,                                                                    |
| <b>VGLQVVAVK</b>           | Both<br>human and<br>chicken | B3GQS7,F5GWR2,B7Z5E7,B7<br>Z532,P10809,B7Z597,B7Z4F<br>6,                                                                                                                                       | Q5ZL72,                                                                    |
| <b>DSTLIMQLLR</b>          | Both<br>human and<br>chicken | B7Z2E6,Q04917,P61981,Q2F<br>831,B4DMT8,D0PNI1P63104<br>,B4DY04,B4DE78,B3KNB4,B2<br>R6N6,P62258,P31947,E7EX2<br>9,P27348,E7EX24,B5BU24,B<br>4DHC4,B7Z465,Q9H4N8,B0A<br>ZS6,B7ZA86,P31946,Q53S41, | F1NGW3,F1P2P9,F2Z4M6,Q5ZLQ6,Q5ZMT0,Q5ZMD1,Q5ZKC9,Q<br>5F3W6,F1NMY1,Q5ZKJ2, |
| <b>NKHEAMITDLEER</b>       | Both<br>human and<br>chicken | Q86XU5,Q99529,P35579Q60<br>FE2,                                                                                                                                                                 | F1NCD4,P14105,                                                             |
| <b>NLDLDSIIAEVK</b>        | Both<br>human and<br>chicken | E7EUE8,P35908,B4DRY0,P13<br>647,O95678,B2R853,P02538<br>,E7EU87,P48668,P04259,B4E<br>1T1,Q5XKE5,E7EQV7,F5H6G<br>5,B4DWU6,B4DKV4,B4DL32,<br>B4DRU6,A8K2I0,B4DRR0,                                | O93532,                                                                    |
| <b>FHTSRPESFAIYK</b>       | Both<br>human and<br>chicken | P11047,Q8N2D6,E7EWA0,Q<br>9Y6N6,Q6NVY8,                                                                                                                                                         | F1NK49,F1NCH8,                                                             |
| <b>VALTGLTVAEYFR</b>       | Both<br>human and<br>chicken | Q0QEN7,P06576,F8W0P7,F8<br>VPV9,                                                                                                                                                                | Q5ZLC5,                                                                    |
| <b>TAFDEAIAELDTLNEDSYK</b> | Both<br>human and<br>chicken | B4DMT8,B4DY04,P27348,Q5<br>3S41,                                                                                                                                                                | Q5ZMD1,                                                                    |

|                            |                        |                                                                                                                                        |                                     |
|----------------------------|------------------------|----------------------------------------------------------------------------------------------------------------------------------------|-------------------------------------|
| <b>NLPIYSEEIVEMYK</b>      | Both human and chicken | Q86XU5,Q5BKV1,A8K6E4,B4E3S1,P35579Q60FE2,                                                                                              | P14105,                             |
| <b>ISCTIANR</b>            | Both human and chicken | P02751,E9PE77,F8W7G7,E9PG29,E7ERA1,Q7Z391,B7ZLF0,B7ZLE5,Q564H7,Q6MZF4,                                                                 | F1NJT3,                             |
| <b>MAALEVYVR</b>           | Both human and chicken | B2ZZ90Q13085,                                                                                                                          | F1P5V8,F1NWT0,F1NH15,F1P1B5,P11029, |
| <b>NMQDLVEDFK</b>          | Both human and chicken | P13647,E7EU87,F8W0C6,                                                                                                                  | O93532,                             |
| <b>SAVTTVVNPK</b>          | Both human and chicken | P05556,                                                                                                                                | F1N8N7,P07228,                      |
| <b>PAQGVVTTLENVSPRR</b>    | Both human and chicken | A6YID3,P02751,E9PE77,B4D TK1,A6YID5,A6YID4,F8W7G7,A6YID6,E7ERA1,B4DU16,O95617,B7ZLF0,A6YID2,B7ZLE5,Q6N084,Q9UQS6,Q59G22,Q68CX6,Q5CZ99, | F1NJT3,F1NJT4,P11722,               |
| <b>GVDEATIIDILTK</b>       | Both human and chicken | B5BU38,Q5T3N0,Q5T3N1,P04083Q5TZZ9,                                                                                                     | E1C344,Q6QAZ9,F1N9S7,Q92108,        |
| <b>ATIFNYLK</b>            | Both human and chicken | B7Z7V4,Q6ZWK7,B3KVV6,F5H805,F5H2Z2,D3DUV3,A8K2U0,F5H2W3,                                                                               | F1NEQ4,                             |
| <b>GAGTGGLGLTVEGPCEAK</b>  | Both human and chicken | Q60FE7,Q14315,E7EN95,B2Z83,O75369,Q68CT4,                                                                                              | F1NG82,F1N8D4,Q90574,               |
| <b>SSPVVIDASTAIDAPSNLR</b> | Both human and chicken | A6YID3,P02751,E9PE77,B4D TK1,A6YID5,A6YID4,F8W7G7                                                                                      | F1NJT3,F1NJT4,P11722,               |

|                               |                        |                                                                                              |                                                   |
|-------------------------------|------------------------|----------------------------------------------------------------------------------------------|---------------------------------------------------|
|                               | chicken                | ,A6YID6,E7ERA1,B4DU16,O95617,B7ZLF0,A6YID2,B7ZLE5,Q6N084,Q9UQS6,Q59G22,Q68CX6,Q6MZM7,Q5CZ99, |                                                   |
| <b>HSVQDGVLR</b>              | Both human and chicken | Q59EG0,P98160,                                                                               | F1NAT6,Q6KDZ1,                                    |
| <b>FDAGSGMATIR</b>            | Both human and chicken | Q59EG0,P98160,                                                                               | F1NAT6,Q6KDZ1,                                    |
| <b>VQISLVQYSR</b>             | Both human and chicken | D6RGG3,Q99715,                                                                               | P13944,F1NKN1,F1NM33,F1NX22,                      |
| <b>TTAENEFVVLK</b>            | Both human and chicken | F8W1S1,Q7RTS7,Q86Y46,                                                                        | O93532,                                           |
| <b>YTDFSTGLIAGQCR</b>         | Both human and chicken | E7EPA6,G3XAI2,P07942,                                                                        | F1NJ23,                                           |
| <b>SPVFLYEDHTGKPGPEDYPLFR</b> | Both human and chicken | B2ZZ86,Q59EE7,P20908,                                                                        | F1NR02,E1BTC9,Q9IAU4,F1NR03,F1NR01,Q90589,F1NI79, |
| <b>SFLDLLNATGK</b>            | Both human and chicken | B5BTY4,B4E3E8,O00571,Q59GX6,Q5S4N1,                                                          | F1NIX1,Q5F491,F1NIX2,                             |
| <b>NQLTSNPENTVFDK</b>         | Both human and chicken | P11021,B4DEF7,                                                                               | Q90593,                                           |
| <b>YNEDLELEDAIHTAILTK</b>     | Both human and chicken | C9JCK5,P25787,Q53GF5,                                                                        | E1C006,                                           |

|                         |                        |                                                                                                                                                                                                                                                                                                                                 |                                                                                       |
|-------------------------|------------------------|---------------------------------------------------------------------------------------------------------------------------------------------------------------------------------------------------------------------------------------------------------------------------------------------------------------------------------|---------------------------------------------------------------------------------------|
| <b>QEDCCGTVGTSWGFNK</b> | Both human and chicken | E7EWM0,C9JD84,Q14766,B7 ZLY3,E7EV71,                                                                                                                                                                                                                                                                                            | F1N9I4,                                                                               |
| <b>DFTVASPAEFVTR</b>    | Both human and chicken | O00763,F8W8T8,B2ZZ90Q13 085,A8MYL5,                                                                                                                                                                                                                                                                                             | F1P5V8,F1NWT0,P11029,                                                                 |
| <b>FTGVITQGR</b>        | Both human and chicken | B4DK28,Q8N436,B4E3Q2,Q6 58N0,E7EUK5,Q8IU7X,B4E1X 6,                                                                                                                                                                                                                                                                             | F1NYP8,                                                                               |
| <b>SYELPDGQVITIGNER</b> | Both human and chicken | P60709Q1KLZ0,A5A3E0,B3K UD3,B7Z6P1,F5H0N0,Q6PJ4 3,B4E335,P63261,Q96FU6,B 3KPP5,Q6S8J3,E9PG30,B3K WQ3,A6NL76,B4E3A4,B4E31 5,Q13707,F5H1C1,Q53G76,A 5GZ75,F5GYT4,B7ZAP6,Q96 DE1,A4UCT3,P68032,F1BXA6 ,P63267,G8FSY7,B4DVQ0,D2 JYH4P62736,Q53G99,P6813 3,Q5T8M8,B3KW67,Q5T8M 7,A8K3K1,Q53GK6,Q9BYX7, Q562R1,B4DW52,B4DUI8,Q 8WVW5, | P60706,P68034,F1NDV5,P53478,P63270,F1N8P3,G1K2Y7,P0802 3,F1P2P8,F1P476,P68139,Q5ZMQ2, |
| <b>LSAEDLVLEGAGLR</b>   | Both human and chicken | P11047,                                                                                                                                                                                                                                                                                                                         | F1NI05,F1NK49,Q90ZN3,                                                                 |
| <b>STLTDSLCK</b>        | Both human and chicken | F5GZG3,Q6PK56,B4DPU3,B4 DMC6,P13639,F5H370,B4DR E8,                                                                                                                                                                                                                                                                             | F1NFS0,Q90705,                                                                        |
| <b>LFIGGLSFETTEESLR</b> | Both human and chicken | P22626,                                                                                                                                                                                                                                                                                                                         | Q5ZME1,                                                                               |

|                                    |                        |                                                                                                                                                                                       |                                                   |
|------------------------------------|------------------------|---------------------------------------------------------------------------------------------------------------------------------------------------------------------------------------|---------------------------------------------------|
| <b>GVVDESDLPLNISR</b>              | Both human and chicken | Q5T9W6,E9PHI2,B4DMA2,Q9H6X9,A8K3W9,Q5T9W4,P07900,B4DGL0,E9PHI1,O75322,Q58FF7,P08238,Q8TBA7,Q2VPJ6,Q5T9W5,Q86U12,Q96HX7,E9PHH7,                                                        | P11501,Q04619,F1NC33,F1NDI7,                      |
| <b>IDTIEITDR</b>                   | Both human and chicken | P22626,                                                                                                                                                                               | Q5ZME1,                                           |
| <b>FIEMGFIDEK</b>                  | Both human and chicken | Q12884,B4DLR2,B2RD89,                                                                                                                                                                 | F1NDP3,                                           |
| <b>ELISNASDALDK</b>                | Both human and chicken | Q5CAQ5,Q5T9W8,B4DMA2,B4DQX3,B4DGL0,Q58FF8,Q58FF7,P08238,Q6PK50,Q59FC6,F8W026,P14625,Q58FF6,Q96GW1,                                                                                    | Q04619,P08110,F1NWB7,F1NC33,F1NDI7,Q90WA6,B5AAV6, |
| <b>SGPFGQIFRPDNFVFGQSGAGNN WAK</b> | Both human and chicken | B4DJ43,B7ZAF0,B4DY90,P04350,E9PBJ4,A5D907,P68371,A5D906,B2R6L0,B4DMJ5,Q8N6N5,F8VW92,Q6LC01,Q8IWP6,B7ZAK1,Q9BVA1,Q13885,F8VYX6,P07437Q5SU16,Q5JP53,B4DE77,Q8IZ29,Q5ST81,A1L195,B4DQN9, | G1K342,G1K338,P09244,P32882,F1NYB1,E1C520,P09203, |
| <b>TWNDPSVQQDIK</b>                | Both human and chicken | P11021,B4DEF7,                                                                                                                                                                        | Q90593,                                           |
| <b>GLYAAFDCATMK</b>                | Both human and chicken | P11498,                                                                                                                                                                               | Q8JHF6,                                           |

|                                 |                        |                                                                                                                          |                                                                  |
|---------------------------------|------------------------|--------------------------------------------------------------------------------------------------------------------------|------------------------------------------------------------------|
| <b>ELISNSSDALDK</b>             | Both human and chicken | G3V2J8,P07900,Q14568,Q86 SX1,Q2VPJ6,B4DTA5,                                                                              | F1NKM6,P11501,Q2XQE5,F1NKM8,Q5ZMA5,Q5ZKZ3,Q5ZIC0,F1 NVN4,F1NKM3, |
| <b>CGNPDVANYNFFPR</b>           | Both human and chicken | E9PE45,P08253,B4DWH3,                                                                                                    | Q90611,                                                          |
| <b>DSSNVLQLIVDAYGK</b>          | Both human and chicken | Q2YFE1,P05106,B4DTY9,                                                                                                    | F1NS08,Q92071,                                                   |
| <b>QDVNASLAR</b>                | Both human and chicken | P08670,B0YJC5,Q53HU8,B3K RK8,F5H288,B0YJC4,Q5JVS8,                                                                       | F1NXT0,F1NFH3,F1NJ08,                                            |
| <b>LGVRPSQGGEAPR</b>            | Both human and chicken | P02751,E9PE77,F8W7G7,E7E RA1,B7ZLF0,B7ZLE5,Q6MZM 7,                                                                      | F1NJT3,                                                          |
| <b>VIQLEGAFALVFK</b>            | Both human and chicken | E5RJP4,B2RB90,B3KMR8,B4 DN38,O94808,Q06210,                                                                              | Q5ZIG5,F1P1F9,F1NM86,                                            |
| <b>LWSGYSLLYFEGQEK</b>          | Both human and chicken | E7EPD1,B4DH43,P08572,                                                                                                    | F1P2Q3,                                                          |
| <b>YMDGMTVGVVR</b>              | Both human and chicken | Q8NBH6,F8W7M9,P23142,                                                                                                    | F1NX60,O73775,                                                   |
| <b>GLPPSLTELHLDGK</b>           | Both human and chicken | P07585Q6FH10,F8VNV6,                                                                                                     | E1BQ80,P28675,E1BRE9,                                            |
| <b>LTPTYGDLNHLVSATMSGVTCL R</b> | Both human and chicken | B4DJ43,B7ZAF0,B4DY90,O43 209,P04350,B4DXZ5,F8VUJ7, A5D907,P68371,Q9BUU9,A5 D906,B2R6L0,Q9UGA2,F8V W92,E7ENH1,Q8IWP6,B7Z4 | G1K342,G1K338,P09244,P32882,F1NYB1,P09203,P09206,                |

|                              |                              |                                                                                                                                                                                                                                     |                                            |
|------------------------------|------------------------------|-------------------------------------------------------------------------------------------------------------------------------------------------------------------------------------------------------------------------------------|--------------------------------------------|
|                              |                              | N1,F5H894,B7ZAK1,B4E052,<br>Q9BVA1,Q13885,F8VYX6,P0<br>7437Q5SU16,B4DMU8,Q96B<br>85,E7EWR1,E7EX69,Q5JP53,<br>B4DE77,Q8IZ29,A1L196,F5H<br>8C9,Q5ST81,A1L195,Q1KSF8<br>,B4DQN9,                                                       |                                            |
| <b>EIVHIQAGQCGNQIGAK</b>     | Both<br>human and<br>chicken | B4DXZ5,E9PBJ4,F8VUJ7,G3V<br>3R4,B2R6L0,B4DMJ5,F8VW9<br>2,G3V4U2,E7ENH1,B2RBD5,<br>G3V5W4,B7Z4N1,B4E052,Q9<br>BVA1,Q13885,F8VYX6,P0743<br>7Q5SU16,Q13509,G3V2R8,B<br>4DMU8,G3V3J6,G3V2N6,G3<br>V3W7,Q53G92,E7EWR1,E7E<br>X69,F5H8C9, | G1K338,P09244,P32882,E1C520,P09203,P09652, |
| <b>GLLLDTTFR</b>             | <b>just<br/>chicken</b>      |                                                                                                                                                                                                                                     | <b>NP_989677</b>                           |
| <b>IDNLDALLAAAAEVAGQAALR</b> | Just<br>chicken              |                                                                                                                                                                                                                                     | F1NTM6,F1NWR2,Q90997<br>,                  |
| <b>SSGADFISFGLVGGRPEFR</b>   | Just<br>chicken              |                                                                                                                                                                                                                                     | F1NAT6,Q6KDZ1,                             |
| <b>DIPVNPICIYR</b>           | Just<br>chicken              |                                                                                                                                                                                                                                     | F1NLP7,Q91422,F1NLP6,Q03352,               |
| <b>ILFDTGLVNPR</b>           | Just<br>chicken              |                                                                                                                                                                                                                                     | F1NP23,Q9I9K4,F1NC71,                      |
| <b>HIYETESVMK</b>            | Just<br>chicken              |                                                                                                                                                                                                                                     | E1C1G2,E1BV96,P84407,                      |
| <b>LSQLSVADSGEYVCR</b>       | Just<br>chicken              |                                                                                                                                                                                                                                     | F1NAT6,Q6KDZ1,                             |
| <b>LPQLQVLR</b>              | Just<br>chicken              |                                                                                                                                                                                                                                     | F1N822,                                    |



|                                                 |                 |                                                   |
|-------------------------------------------------|-----------------|---------------------------------------------------|
| <b>SECIVNAENDDKPANLSPQVR</b>                    | Just<br>chicken | E1C1G2,E1BV96,P84407,                             |
| <b>MQGIIDDTDQNYSQLR</b>                         | Just<br>chicken | F1P4V1,P14448,                                    |
| <b>VSIQGNPVSILVEK</b>                           | Just<br>chicken | Q90633,A6N9E0,                                    |
| <b>ISVVDADEFGAPGSTAVYEIIR</b>                   | Just<br>chicken | F1NJD7,                                           |
| <b>NAQQAEDSFQFR</b>                             | Just<br>chicken | F1NG70,                                           |
| <b>DNLDNNIPSSLR</b>                             | Just<br>chicken | F1NUL9,F1P5F9,Q02020,                             |
| <b>DQEDTKETIQNAK</b>                            | Just<br>chicken | F1NZZ2,                                           |
| <b>AAVTTIWAK</b>                                | Just<br>chicken | P02007,                                           |
| <b>ASGFASQYIYGSSVR</b>                          | Just<br>chicken | F1P3M9,Q9DEG0,                                    |
| <b>LAHSCSAFVHSHWVLEETCSGGC<br/>K</b>            | Just<br>chicken | F1P350,P87498,E1BY96,                             |
| <b>VSQPDFVQPYQR</b>                             | Just<br>chicken | P19121,F2Z4L6,                                    |
| <b>TYHCACPEEFTGR</b>                            | Just<br>chicken | E1BZN8,                                           |
| <b>EATIPGHLNSYTISGLKPGVVYEG<br/>QLISVQQHGPK</b> | Just<br>chicken | F1NJT3,                                           |
| <b>TIQSEPVVFDVHYPTK</b>                         | Just<br>chicken | P42292,F1NL79,                                    |
| <b>ASGKDAIAQFESSAVGK</b>                        | Just<br>chicken | F1N8F3,P08250,                                    |
| <b>AQSDFGVDTK</b>                               | Just<br>chicken | Q4ADG4,E1BQC2,Q4ADJ6,P02789,E1BS66,Q4ADJ7,F1NL17, |

|                                            |                 |                                         |
|--------------------------------------------|-----------------|-----------------------------------------|
| <b>IEPQFGGTACPETVQR</b>                    | Just<br>chicken | Q9W770,F1P046,F1NG26,                   |
| <b>YCQETSCLLPLEGGGLQGEPWKPS<br/>YEIGER</b> | Just<br>chicken | E1C6U2,F1DQG4,                          |
| <b>VETQFQHGHYDK</b>                        | Just<br>chicken | F1P5V8,F1NWT0,P11029,                   |
| <b>DIGPSENVIVR</b>                         | Just<br>chicken | E1BR88,E1BXR4,                          |
| <b>TEFNLNQYFR</b>                          | Just<br>chicken | P13944,F1NKN1,F1NM33,F1NX22,            |
| <b>LEEAFITSPK</b>                          | Just<br>chicken | Q8JIG5,F1P2P7,A7UEB0,                   |
| <b>ALTGCDYLTISPK</b>                       | Just<br>chicken | Q5ZKN8,                                 |
| <b>SADPFLQVSNDLAR</b>                      | Just<br>chicken | F1P2F0,                                 |
| <b>TLANYLVWR</b>                           | Just<br>chicken | E1BR88,E1BXR4,                          |
| <b>LSDLLEALGQALDYVIQTEAINK</b>             | Just<br>chicken | F1NSZ5,                                 |
| <b>GIDMLNAAHEGNLVPK</b>                    | Just<br>chicken | F1NIE2,F1N8L7,F1NIE3,                   |
| <b>LDVTTVADR</b>                           | Just<br>chicken | F1NV02,Q197X2,                          |
| <b>WPLNTLLCLPK</b>                         | Just<br>chicken | F1NYG4,E1BSE0,                          |
| <b>IEGVPQFLVILSSR</b>                      | Just<br>chicken | F1P2F0,P15989,                          |
| <b>LMANSAGSVADLVEVGIRVEGLA<br/>DVIMK</b>   | Just<br>chicken | P02845,Q6BCB8,F1NV01,F1NFL6,E1BYN6<br>, |
| <b>ETVDQLQQAETK</b>                        | Just<br>chicken | O93601,                                 |

|                               |                 |                                            |
|-------------------------------|-----------------|--------------------------------------------|
| <b>VLSSFGEAVK</b>             | Just<br>chicken | F1NMZ3,E1C3W0,P02127,P02128,F1N9X2,Q90864, |
| <b>VFPGIISHIHVENC DR</b>      | Just<br>chicken | P08940,F1NEF7,F1NXC3,                      |
| <b>TPDFIVPLTDLK</b>           | Just<br>chicken | F1NV02,Q197X2,                             |
| <b>RGEPGSLFGFSLAMHR</b>       | Just<br>chicken | P26007,                                    |
| <b>TIADGFTAMV DK</b>          | Just<br>chicken | P19121,F2Z4L6,                             |
| <b>GCPTEQLTPAHR</b>           | Just<br>chicken | F1NZZ2,                                    |
| <b>HSDSLHVWVTGMTKPILIAEK</b>  | Just<br>chicken | F1NMM7,E1C340,F1NZJ5,                      |
| <b>YALWWSPSGK</b>             | Just<br>chicken | F1NDP3,                                    |
| <b>DGTSWVACPR</b>             | Just<br>chicken | F1NFY4,P10184,F1NMN2,F1NUT1,               |
| <b>SNSCVCEDEDAPCEEGR</b>      | Just<br>chicken | E1C6U2,F1DQG4,                             |
| <b>SMGIEELFSEK</b>            | Just<br>chicken | O73840,F1NJ16,                             |
| <b>RLVPFATELQAQLVQDSQR</b>    | Just<br>chicken | O93601,                                    |
| <b>TLEVASTFLTCPQIQK</b>       | Just<br>chicken | E1BYN5,E1BZD1,                             |
| <b>DTSCGTGYELTDDSR</b>        | Just<br>chicken | F1NX60,O73775,                             |
| <b>LDGASAFQGALISPHYDSSLVK</b> | Just<br>chicken | Q8JHF6,                                    |
| <b>ELPTETPLVSAYLK</b>         | Just<br>chicken | P02845,Q6BCB8,F1NV01,F1NFL6,E1BYN6<br>,    |

|                                               |                 |                                                   |
|-----------------------------------------------|-----------------|---------------------------------------------------|
| <b>YGCGYFGAPR</b>                             | Just<br>chicken | P08940,F1NEF7,F1NXC3,                             |
| <b>NQVSIQIFK</b>                              | Just<br>chicken | P28318,                                           |
| <b>PRPGTTEATITGLEPGTEYTIYIIAV<br/>K</b>       | Just<br>chicken | F1NJT3,F1NJT4,P11722,                             |
| <b>MTTEVAEEKR</b>                             | Just<br>chicken | Q90953,E1BZM6,                                    |
| <b>APSAEIMTSYVLLALLNK</b>                     | Just<br>chicken | F1NEW8,                                           |
| <b>TCNPSDILQMCSFLEGK</b>                      | Just<br>chicken | Q4ADG4,E1BQC2,Q4ADJ6,P02789,E1BS66,Q4ADJ7,F1NL17, |
| <b>VAGNVQAQITPSPR</b>                         | Just<br>chicken | F1P350,P87498,E1BY96,                             |
| <b>YSDIEPSTEGEVIYR</b>                        | Just<br>chicken | F1NUC1,Q01635,F1NJ23,O57484,                      |
| <b>SIDLPLPK</b>                               | Just<br>chicken | E1C7T1,                                           |
| <b>AHREEHISLAK</b>                            | Just<br>chicken | F1NG70,                                           |
| <b>RDWLVIPDAAAAYIYEAVNK</b>                   | Just<br>chicken | P02659,                                           |
| <b>DSNVNWNLNK</b>                             | Just<br>chicken | Q4ADG4,E1BQC2,Q4ADJ6,P02789,E1BS66,Q4ADJ7,F1NL17, |
| <b>VISDLNVGPDATR</b>                          | Just<br>chicken | F1P2F0,P15989,                                    |
| <b>VPFTLPLGPSSSYETR</b>                       | Just<br>chicken | F1P350,E1BY96,                                    |
| <b>FMMFESQNKDLLFK</b>                         | Just<br>chicken | Q4ADG4,E1BQC2,Q4ADJ6,P02789,E1BS66,Q4ADJ7,F1NL17, |
| <b>LEIDENYVPLSLTPDLFTFHEDLCT<br/>TEEKLQHR</b> | Just<br>chicken | E1C1G2,E1BV96,P84407,                             |

|                               |                 |                                                   |
|-------------------------------|-----------------|---------------------------------------------------|
| <b>VWDTVENS DIGCTPGSGR</b>    | Just<br>chicken | Q90633,                                           |
| <b>QITINDLPVGR</b>            | Just<br>chicken | P0CB50,G1K326,                                    |
| <b>KGTEFTVNDLQ GK</b>         | Just<br>chicken | Q4ADG4,E1BQC2,Q4ADJ6,P02789,E1BS66,Q4ADJ7,F1NL17, |
| <b>ELEPGEYNIFVK</b>           | Just<br>chicken | E1C6M9,F1NUS5,P08641,                             |
| <b>YGCCPDGVSAAR</b>           | Just<br>chicken | F1P2U7,                                           |
| <b>VLVVQDFTGLPTLER</b>        | Just<br>chicken | F1P2F0,P15989,                                    |
| <b>DTGEVQVATINLDR</b>         | Just<br>chicken | F1NJD5,                                           |
| <b>MGVTD MF SN NAD FSGVAK</b> | Just<br>chicken | E1C7T1,                                           |
| <b>GVLNMMQITIK</b>            | Just<br>chicken | E1BYN5,E1BZD1,                                    |
| <b>FMQFSQEQLKDEEILPQTDK</b>   | Just<br>chicken | Q8QFM7,                                           |
| <b>EKGDYYFQNE LLSFTK</b>      | Just<br>chicken | E1C1G2,E1BV96,                                    |
| <b>GATYNIIVEALKDHR</b>        | Just<br>chicken | F1NJT3,F1NJT4,P11722,                             |
| <b>KDSNVNWN NLK</b>           | Just<br>chicken | Q4ADG4,E1BQC2,Q4ADJ6,P02789,E1BS66,Q4ADJ7,F1NL17, |
| <b>LDVTTVADRK</b>             | Just<br>chicken | F1NV02,Q197X2,                                    |
| <b>GCQTQG PLSELEK</b>         | Just<br>chicken | P28318,                                           |
| <b>LSQYQEPLHVPSVR</b>         | Just<br>chicken | E1BR16,F1POM2,                                    |

|                                        |                 |                                    |
|----------------------------------------|-----------------|------------------------------------|
| <b>AGAVVEAALSYPGDVADPTR</b>            | Just<br>chicken | Q8JHF6,                            |
| <b>QIQSLTCEVDALK</b>                   | Just<br>chicken | F1NXT0,F1NFH3,Q49MC0,P09654,F1NJ08 |
| <b>FYTGGVEEVNFK</b>                    | Just<br>chicken | ,<br>P01014,F1NJA4,                |
| <b>NIQNTVQETENLAEQAR</b>               | Just<br>chicken | F1NI05,F1NK49,Q90ZN3,              |
| <b>VSAVNPTPQGTQALLK</b>                | Just<br>chicken | F1NAU1,                            |
| <b>RHPFLYAPTILSVAIHYDEMMKD<br/>CCR</b> | Just<br>chicken | E1C1G2,E1BV96,P84407,              |
| <b>GTAEAVQQALEAR</b>                   | Just<br>chicken | E1C700,O57484,F1NX80,              |
| <b>VQYFITYTPVAGGETK</b>                | Just<br>chicken | F1NKN1,F1NM33,                     |
| <b>LDELLQTSSGSSGSK</b>                 | Just<br>chicken | E1C6U2,F1DQG4,                     |
| <b>ILLANFLAQTEALMK</b>                 | Just<br>chicken | F1NV05,F1NIJ6,Q5ZMU3,              |
| <b>LDKDTLQNVLQVWYGPDEK</b>             | Just<br>chicken | F1P350,P87498,E1BY96,              |
| <b>RLNSYTGIVYLQR</b>                   | Just<br>chicken | F1NWN4,                            |
| <b>STDEVERPSGALK</b>                   | Just<br>chicken | F1P2F0,P15989,                     |
| <b>PLPSIILDEICQVEK</b>                 | Just<br>chicken | P19121,F2Z4L6,                     |
| <b>EAEPLTNNENEDAASR</b>                | Just<br>chicken | F1NVU4,                            |
| <b>GEGGPAGPAGPAGAR</b>                 | Just<br>chicken | P02467,F1POH9,F1NCR0,              |

|                               |              |                                    |
|-------------------------------|--------------|------------------------------------|
| <b>NFLGDVIPPGITIVAQAVR</b>    | Just chicken | F1P350,P87498,E1BY96,              |
| <b>ELLLMVLQR</b>              | Just chicken | Q6KDZ1,                            |
| <b>DLTQDIISDTSGDFQK</b>       | Just chicken | Q6QAZ9,F1N9S7,                     |
| <b>DVVFLVDGSR</b>             | Just chicken | F1P2F0,P15989,                     |
| <b>MMACAVIFETR</b>            | Just chicken | P02845,Q6BCB8,F1NV01,F1NFL6,E1BYN6 |
| <b>LNTFDDKAQALGALQNVQYR</b>   | Just chicken | ,<br>P13944,F1NKN1,F1NM33,F1NX22,  |
| <b>LQPDTPYAITVSSMYADGEGGR</b> | Just chicken | P13944,F1NKN1,F1NM33,F1NX22,       |
| <b>TDSISGAFK</b>              | Just chicken | P51890,                            |
| <b>VIHQSFVAVDEK</b>           | Just chicken | O73790,                            |
| <b>KTLSLLTMSNR</b>            | Just chicken | Q9W6F5,F1NVF3,                     |
| <b>LGPTLMCLLSTQFR</b>         | Just chicken | F1NN41,                            |
| <b>APCTDGCFCPPGTILDDLGGKK</b> | Just chicken | Q98UI9,F1NZY2,                     |
| <b>AVAMITFAQYLQR</b>          | Just chicken | P19121,F2Z4L6,                     |
| <b>TITIQVPLWMAGK</b>          | Just chicken | P02845,F1NFL6,E1BYN6,              |
| <b>GPDVIWLDDVNCGTEESIFDCK</b> | Just chicken | Q98TD1,                            |
| <b>STPIKAPDTQLQNQGSLR</b>     | Just chicken | E1BYN5,E1BZD1,                     |

|                            |                 |                                                                                                                                                                                                                                                                                                                                                                                                                                                                                                                                                                                 |
|----------------------------|-----------------|---------------------------------------------------------------------------------------------------------------------------------------------------------------------------------------------------------------------------------------------------------------------------------------------------------------------------------------------------------------------------------------------------------------------------------------------------------------------------------------------------------------------------------------------------------------------------------|
| <b>QEIPEIDCDQYPTR</b>      | Just<br>chicken | F1NFY4,P10184,F1NMN2,                                                                                                                                                                                                                                                                                                                                                                                                                                                                                                                                                           |
| <b>IQLEIQAGSR</b>          | Just<br>chicken | P02845,Q6BCB8,F1NV01,F1NFL6,E1BYN6                                                                                                                                                                                                                                                                                                                                                                                                                                                                                                                                              |
| <b>GTDVNVFITILTSR</b>      | Just<br>chicken | Q6QAZ9,F1N9S7,                                                                                                                                                                                                                                                                                                                                                                                                                                                                                                                                                                  |
| <b>IEKVPFDAATLHTSR</b>     | Just<br>chicken | F1NKF3,O93510,                                                                                                                                                                                                                                                                                                                                                                                                                                                                                                                                                                  |
| <b>NNPNPDQLNDIACLGMPR</b>  | Just<br>chicken | F1NFE0,P20785,F1NBG1,                                                                                                                                                                                                                                                                                                                                                                                                                                                                                                                                                           |
| <b>DFLDVEMK</b>            | Just<br>chicken | F1NWN4,                                                                                                                                                                                                                                                                                                                                                                                                                                                                                                                                                                         |
| <b>TELEKDIISDTSGDFRK</b>   | Just<br>chicken | P17785,                                                                                                                                                                                                                                                                                                                                                                                                                                                                                                                                                                         |
| <b>QPISQAWEPADAGR</b>      | Just<br>chicken | F1C6T9,B6RCN7,B6RCP0,Q31553,E2JF31,F1C6U0,B6RCP6,B6RCP2,B5BSL0,B6RCP1,F1C6V3,Q4U600,B5BS98,B5BSJ8,F1C6W5,B5BSM3,B5BSM5,F1C6T7,B6RCN9,F1C6T8,B5BSJ6,F1C6V0,Q4U5Z9,E2JF30,A5HUL4,F1C6U7,F1C6T6,F1C6W8,E2JF32,B5BSA0,B6RCP5,Q31410,F1C6V2,F1C6W2,F1C6U8,F1C6W9,F1C6W7,B6C862,B6RCN5,F1C6U2,F1C6U5,F1C6U4,E2JF33,B6RCP4,B5BSB2,F1C6V8,Q31413,F1C6W4,B6RCN6,F1C6W1,F1C6V7,F1C6U6,B5BSB4,E5LFW9,B5BSF4,F1C6V1,Q4U5Z8,B5BSR6,B5BSE2,F1C6U3,B6C863,F1C6W3,B6RCP3,F1C6V5,Q6R674,A5HUL2,F1C6W0,F1C6W6,B5BSI2,F1C6U1,B5BSF6,F1C6V4,F1C6X1,F1C6U9,Q31398,Q90615,O42094,F1N8Z0,F1NJQ6,E1C0V6 |
| <b>FAIAILGSYSR</b>         | Just<br>chicken | ,                                                                                                                                                                                                                                                                                                                                                                                                                                                                                                                                                                               |
| <b>DGEAGAQQPPGPTGPAGER</b> | Just<br>chicken | P02457,                                                                                                                                                                                                                                                                                                                                                                                                                                                                                                                                                                         |
| <b>ESYNVQLELPAR</b>        | Just<br>chicken | F1NDL4,                                                                                                                                                                                                                                                                                                                                                                                                                                                                                                                                                                         |
| <b>TTDVTQTFEIEK</b>        | Just<br>chicken | E1BZN8,                                                                                                                                                                                                                                                                                                                                                                                                                                                                                                                                                                         |



|                                         |                 |                                         |
|-----------------------------------------|-----------------|-----------------------------------------|
| <b>RGGALPPSSQVSGTHLR</b>                | Just<br>chicken | Q6KDZ1,                                 |
| <b>IAWESPQQQVTR</b>                     | Just<br>chicken | F1NJT3,O57403,F1NJT4,P11722,            |
| <b>GSVAEDISINR</b>                      | Just<br>chicken | F1NV02,Q197X2,                          |
| <b>VGVQWLK</b>                          | Just<br>chicken | F1NDP3,                                 |
| <b>LQGAHLTSILSHEEQVFNVR</b>             | Just<br>chicken | E1C5G1,Q90953,                          |
| <b>MPQVPTDLLLETGKK</b>                  | Just<br>chicken | P19121,F2Z4L6,                          |
| <b>TSILPEDAPLDVTEEPFQTSER</b>           | Just<br>chicken | P02845,Q6BCB8,F1NV01,F1NFL6,E1BYN6<br>, |
| <b>HVMIDCSPYLQVVR</b>                   | Just<br>chicken | P10184,                                 |
| <b>TATANVLLSPFSLATALSGLSLGA<br/>GER</b> | Just<br>chicken | E1C7H6,                                 |
| <b>ISVVGAVGAVGMACAISILMK</b>            | Just<br>chicken | P00340,F1NW35,E1BTT8,                   |
| <b>MGLEDLFSPENAK</b>                    | Just<br>chicken | Q91422,                                 |
| <b>QLNTLLQSNLQSANSYAEELQR</b>           | Just<br>chicken | O93601,                                 |
| <b>GYWEEPFEYNTR</b>                     | Just<br>chicken | E1C7T1,                                 |
| <b>ASSEALAAFVGDGALFVEK</b>              | Just<br>chicken | Q8JHF6,                                 |
| <b>FSSQEAASSFGDDR</b>                   | Just<br>chicken | E1BR16,F1P0M2,                          |
| <b>SLLQIQNFQATLTKPR</b>                 | Just<br>chicken | F1P2F0,P15989,                          |

|                                       |                 |                              |
|---------------------------------------|-----------------|------------------------------|
| <b>QDTGTYCIASNR</b>                   | Just<br>chicken | F1NMM7,E1C340,F1NZJ5,        |
| <b>SFDYQVDKEGYDNIQK</b>               | Just<br>chicken | F1P4V1,P14448,               |
| <b>FQGLDLNEELYLGGYPDYTIVAK</b>        | Just<br>chicken | F1NAT6,Q6KDZ1,               |
| <b>LNEIEGTLNSAK</b>                   | Just<br>chicken | F1NK49,Q5ZIH4,               |
| <b>GYANTATDIVEMALR</b>                | Just<br>chicken | E1BYN5,E1BZD1,               |
| <b>DCQDYQVATQIATGQFAAHPAI<br/>QVK</b> | Just<br>chicken | E1BYN5,F1NY78,Q91025,E1BZD1, |
| <b>IVQQLDVGPNK</b>                    | Just<br>chicken | F1P2F0,P15989,               |
| <b>HPSAGLEENYCR</b>                   | Just<br>chicken | F1NWX6,                      |
| <b>HFKDNHVGLSLSAR</b>                 | Just<br>chicken | Q8JIG5,F1P2P7,A7UEB0,        |
| <b>RMACSEGYLSIVIHDTCR</b>             | Just<br>chicken | P19121,F2Z4L6,               |
| <b>EFSTCKPFISGLNFCTK</b>              | Just<br>chicken | F1NV02,Q197X2,               |
| <b>VPTPNVSVVDLTCR</b>                 | Just<br>chicken | F1NH87,P00356,F1NK14,        |
| <b>LGLLEGQTDALK</b>                   | Just<br>chicken | E1C700,O57484,F1NX80,        |
| <b>IESQAFFGLNK</b>                    | Just<br>chicken | Q9DEQ5,                      |
| <b>VQQAELHTGTLPQIQSTALR</b>           | Just<br>chicken | F1P5V8,F1NWT0,P11029,        |
| <b>EVAVNTEQLQSSK</b>                  | Just<br>chicken | F1NDN9,                      |

|                               |                 |                       |
|-------------------------------|-----------------|-----------------------|
| <b>QTSAVSAMLVLVK</b>          | Just<br>chicken | E1C6M8,               |
| <b>NPDGDVNGPWICYTTDPR</b>     | Just<br>chicken | F1NWX6,               |
| <b>QPGNTWLTAFLVK</b>          | Just<br>chicken | E1C544,               |
| <b>IGYQCGIVFR</b>             | Just<br>chicken | F1NX60,O73775,        |
| <b>AGSATVPLLIK</b>            | Just<br>chicken | F1NJD5,               |
| <b>FSYVHVDECGCVETK</b>        | Just<br>chicken | Q98UI9,F1NZY2,        |
| <b>TPSAAYLWVGR</b>            | Just<br>chicken | F1NKF3,O93510,        |
| <b>IAQQVGYENAGTVEFLVDR</b>    | Just<br>chicken | Q8JHF6,               |
| <b>FTIQLSIK</b>               | Just<br>chicken | O42094,F1N8Z0,E1C0V6, |
| <b>FLSAVSAVLAEK</b>           | Just<br>chicken | P02001,E1C4M2,        |
| <b>NSYPDIAVGSLSDSVSVFR</b>    | Just<br>chicken | P26007,F1P0M0,F1P0B0, |
| <b>KQEMLINLIK</b>             | Just<br>chicken | E1C1G2,E1BV96,        |
| <b>LLGAPVPVDENDEGLQR</b>      | Just<br>chicken | P01038,               |
| <b>GQCVRPLTGAVTK</b>          | Just<br>chicken | F1NII7,F1NJQ9,        |
| <b>KMGLEDLFSPENAK</b>         | Just<br>chicken | Q91422,               |
| <b>THIEGQVPFVPENTSVHIAPYK</b> | Just<br>chicken | F1NDL4,               |

|                                             |                 |                                                   |
|---------------------------------------------|-----------------|---------------------------------------------------|
| <b>IGGMALFDDVNSYYHAGEMR</b>                 | Just<br>chicken | F1NTK2,                                           |
| <b>LEVGPDLIQVAVAQYADTVRPEF<br/>YFNTHQNR</b> | Just<br>chicken | F1P2F0,P15989,                                    |
| <b>KQDDAIQSYNR</b>                          | Just<br>chicken | F1NK49,Q5ZIH4,                                    |
| <b>LYVGGLPIDYVAK</b>                        | Just<br>chicken | F1N8P9,F1NM47,                                    |
| <b>MGFVPDPTLSR</b>                          | Just<br>chicken | F1N9I4,                                           |
| <b>LSWTADDGVFDSFVLK</b>                     | Just<br>chicken | P10039,F1N8F4,                                    |
| <b>EEAAGLLQDAQGK</b>                        | Just<br>chicken | E1C700,O57484,F1NX80,                             |
| <b>SPCVASCNIPVVSGR</b>                      | Just<br>chicken | F1NUL9,F1P5F9,Q02020,                             |
| <b>MVSSDGSDCSHLQGGR</b>                     | Just<br>chicken | F1P4V1,P14448,                                    |
| <b>LSCSQTEQLQVDYILNK</b>                    | Just<br>chicken | F1NK40,                                           |
| <b>NTDGSTDYGILQINSR</b>                     | Just<br>chicken | P00698,                                           |
| <b>GTEFTVNDLQGK</b>                         | Just<br>chicken | Q4ADG4,E1BQC2,Q4ADJ6,P02789,E1BS66,Q4ADJ7,F1NL17, |
| <b>AISVPMLSVTGMFK</b>                       | Just<br>chicken | F1NDH2,                                           |
| <b>YEIDKHVYFLDR</b>                         | Just<br>chicken | F1NV02,Q197X2,                                    |
| <b>AGLLQEEAK</b>                            | Just<br>chicken | F1NJ23,                                           |
| <b>VYCNMETGETCVYPTQATIAQK</b>               | Just<br>chicken | P02457,                                           |

|                                          |                 |                                                   |
|------------------------------------------|-----------------|---------------------------------------------------|
| <b>DGTPSPEDLLSAALYPK</b>                 | Just<br>chicken | Q8JHF6,                                           |
| <b>LNGFEIFAR</b>                         | Just<br>chicken | F1NGX1,F1NWS1,P26008,                             |
| <b>FLEVVLQCR</b>                         | Just<br>chicken | P02845,Q6BCB8,F1NV01,F1NFL6,E1BYN6<br>,           |
| <b>TSYGLHFCGGTLIDPK</b>                  | Just<br>chicken | F1NWX6,                                           |
| <b>VTLYYQQGCTSALNCGR</b>                 | Just<br>chicken | Q8AV77,                                           |
| <b>SIPTVSENLENFYLQVNK</b>                | Just<br>chicken | P51890,                                           |
| <b>VTVASWMR</b>                          | Just<br>chicken | F1P350,P87498,E1BY96,                             |
| <b>VTDATETTITITWR</b>                    | Just<br>chicken | F1NJT3,F1NJT4,P11722,                             |
| <b>GEADAVALDGGLVYTAGVCGLV<br/>PVMAER</b> | Just<br>chicken | Q4ADG4,E1BQC2,Q4ADJ6,P02789,E1BS66,Q4ADJ7,F1NL17, |
| <b>QLGCGTALSALPESK</b>                   | Just<br>chicken | Q98TD1,                                           |
| <b>NTCLNNLVGELEAK</b>                    | Just<br>chicken | E1BYN5,E1BZD1,                                    |
| <b>LPILDIAPLDIGGADQEFGLHIGPV<br/>CFK</b> | Just<br>chicken | P02467,F1POH9,F1NCRO,                             |
| <b>LKQSDSGTLITDVSSR</b>                  | Just<br>chicken | P02845,Q6BCB8,F1NV01,F1NFL6,E1BYN6<br>,           |
| <b>QSDSGTLITDVSSR</b>                    | Just<br>chicken | P02845,Q6BCB8,F1NV01,F1NFL6,E1BYN6<br>,           |
| <b>VPFDAATLHTSR</b>                      | Just<br>chicken | F1NKF3,O93510,                                    |
| <b>VLLGGPGSFYWQGQLISDR</b>               | Just<br>chicken | F1NGX1,P26008,                                    |

|                                           |                 |                                            |
|-------------------------------------------|-----------------|--------------------------------------------|
| <b>SMQGDKLEVSMK</b>                       | Just<br>chicken | O42390,F1P494,                             |
| <b>DVGQLFHTAMK</b>                        | Just<br>chicken | F1NIV0,                                    |
| <b>LYDASENVIK</b>                         | Just<br>chicken | Q9W6F5,F1NVF3,                             |
| <b>YYAIQQELSPEEIAQK</b>                   | Just<br>chicken | F1NSZ5,                                    |
| <b>EVSPTAMAIFR</b>                        | Just<br>chicken | E1C0K3,F6JXX6,P21760,E1BTW6,E1C0K0,E1C0K1, |
| <b>VLEEAEEAGNK</b>                        | Just<br>chicken | F1NK49,                                    |
| <b>VEYDFLSPYLSPK</b>                      | Just<br>chicken | F1NTM6,F1NWR2,Q90997<br>,                  |
| <b>DFTSTFGPVSLGTR</b>                     | Just<br>chicken | Q8JHF6,                                    |
| <b>YANELDR</b>                            | Just<br>chicken | F1NV02,Q197X2,                             |
| <b>FSLVQTLATLR</b>                        | Just<br>chicken | E1BR88,O93586,F1NN42,E1BXR4,               |
| <b>LEISGLPENAYLLK</b>                     | Just<br>chicken | P02845,F1NFL6,E1BYN6,                      |
| <b>SDFMSVLSNIEYILIK</b>                   | Just<br>chicken | F1N8P9,F1NM47,                             |
| <b>ISVVQFSEHPHVEFLNAHSTKDE<br/>VQGAVR</b> | Just<br>chicken | F1P2F0,P15989,                             |
| <b>SLDIFTVGGSGEDVVTNSAWETF<br/>QR</b>     | Just<br>chicken | F1NJ23,                                    |
| <b>NPDADSRPWCYTDDPSVR</b>                 | Just<br>chicken | F1NWX6,F1NTX4,                             |
| <b>DYKPQVGVVLDPGSK</b>                    | Just<br>chicken | P13944,                                    |

|                          |                 |                              |
|--------------------------|-----------------|------------------------------|
| <b>AATNMVVIEAK</b>       | Just<br>chicken | F1NK40,                      |
| <b>LQFMQAILPEVLSPIR</b>  | Just<br>chicken | F1P2F0,P15989,               |
| <b>ETGWLEVTEQLDR</b>     | Just<br>chicken | P08641,                      |
| <b>TNQELNEINR</b>        | Just<br>chicken | P17785,                      |
| <b>KPQMTEEQIK</b>        | Just<br>chicken | P19121,F2Z4L6,               |
| <b>VATQIESIGLESLER</b>   | Just<br>chicken | P02007,                      |
| <b>QTRPDASPELLQLTDQR</b> | Just<br>chicken | Q9W6F5,F1NVF3,               |
| <b>ECSMTQVQCCR</b>       | Just<br>chicken | F1NX60,O73775,               |
| <b>IAVSDFADITTLR</b>     | Just<br>chicken | Q9W6H0,                      |
| <b>RDQALMEEHAR</b>       | Just<br>chicken | P05094,                      |
| <b>NADVAELQEIAHER</b>    | Just<br>chicken | F1P2F0,P15989,               |
| <b>TSDSTMSSFR</b>        | Just<br>chicken | P13944,F1NKN1,F1NM33,F1NX22, |
| <b>IADEADVKEVEIDR</b>    | Just<br>chicken | P13944,F1NKN1,F1NM33,F1NX22, |
| <b>ISFELTQSVCLR</b>      | Just<br>chicken | P13944,F1NKN1,F1NM33,F1NX22, |
| <b>GLCDELALVDVLEDK</b>   | Just<br>chicken | P00337,                      |
| <b>SPSYPPVDHWAWYK</b>    | Just<br>chicken | F1NMG0,F1NL31,P17790,        |

|                              |                 |                              |
|------------------------------|-----------------|------------------------------|
| <b>TLLSNTVTAMGR</b>          | Just<br>chicken | F1NBA6,                      |
| <b>LVNVVAHALAR</b>           | Just<br>chicken | F1NMZ3,P02128,               |
| <b>VNAALEVNPTILNPENK</b>     | Just<br>chicken | F1NGX1,F1NWS1,P26008,        |
| <b>YSSAGTVEFLVDSSK</b>       | Just<br>chicken | E1BR16,F1POM2,               |
| <b>FGLQTVDR</b>              | Just<br>chicken | F1NZZ2,                      |
| <b>VGLSFSSSEGLPSSDTHLLFR</b> | Just<br>chicken | E1C544,                      |
| <b>VSLPAGIYIPSGALTGSLK</b>   | Just<br>chicken | F1NV02,Q197X2,               |
| <b>TSSKEECAEQCETETK</b>      | Just<br>chicken | F1NWX6,                      |
| <b>TESASSCIGPTR</b>          | Just<br>chicken | F1P2U7,                      |
| <b>QSLLEHYGGSPR</b>          | Just<br>chicken | F1NDL4,                      |
| <b>KDPERNDCFLSLK</b>         | Just<br>chicken | E1C1G2,E1BV96,P84407,        |
| <b>IFAVSHGR</b>              | Just<br>chicken | F1NJT3,                      |
| <b>KPQESEVLEPGK</b>          | Just<br>chicken | F1NLP7,                      |
| <b>IVEVFDIGPDK</b>           | Just<br>chicken | P13944,F1NKN1,F1NM33,F1NX22, |
| <b>HAPLVEFMDEAAESK</b>       | Just<br>chicken | Q5ZK45,F1NYK3,               |
| <b>AFKDEDTQAMPFR</b>         | Just<br>chicken | P01012,                      |



|                                             |                 |                                         |
|---------------------------------------------|-----------------|-----------------------------------------|
| <b>WADTAPHKPNYTPEK</b>                      | Just<br>chicken | F1NWX6,                                 |
| <b>VVGPASASDLR</b>                          | Just<br>chicken | F1NHU4,F1NTQ4,                          |
| <b>TYFPHFDVSQGSVQLR</b>                     | Just<br>chicken | P02007,                                 |
| <b>VIVETINILKPGLEGAQQLDENYG<br/>HVSTELR</b> | Just<br>chicken | F1P4V1,P14448,                          |
| <b>MVYWTDISGPSISR</b>                       | Just<br>chicken | F1NP23,Q9I9K4,F1NC71,                   |
| <b>TKEALLEAVTNLPYK</b>                      | Just<br>chicken | F1NKN1,F1NM33,F1NX22,                   |
| <b>VSDSGIIQLPKPLDR</b>                      | Just<br>chicken | Q8AYD0,F1P1Y9,                          |
| <b>ILSSAGVQIR</b>                           | Just<br>chicken | Q98UI9,                                 |
| <b>GYSLGNWVCAAK</b>                         | Just<br>chicken | B8YK73,P00698,B8YJN9,                   |
| <b>ELTLGAGLR</b>                            | Just<br>chicken | F1NK40,                                 |
| <b>NTFSQLSELHCDK</b>                        | Just<br>chicken | F1N9X1,P02112,                          |
| <b>KAVFENGLNQVIVLELGTNPLK</b>               | Just<br>chicken | E1BQ80,P28675,E1BRE9,                   |
| <b>APLSFDTPSDVAASFMASLSQSV<br/>ER</b>       | Just<br>chicken | P81475,                                 |
| <b>WLLSAVSASGTTETLK</b>                     | Just<br>chicken | P02845,Q6BCB8,F1NV01,F1NFL6,E1BYN6<br>, |
| <b>NSFLINIPLPFGGR</b>                       | Just<br>chicken | F1NV02,Q197X2,                          |
| <b>YFSDASPMLGVPTTVTPFR</b>                  | Just<br>chicken | Q6KDZ1,                                 |

|                              |                 |                |
|------------------------------|-----------------|----------------|
| <b>CPAPAPLQHG TIDSR</b>      | Just<br>chicken | F1NYG4,E1BSE0, |
| <b>ELVAAGTHILCIK</b>         | Just<br>chicken | Q8JHF6,        |
| <b>LNEDCEATTNSLPLR</b>       | Just<br>chicken | E1BX43,        |
| <b>YMTDTSETFSATEIPVGK</b>    | Just<br>chicken | F1NDH2,        |
| <b>KSDDDLFSPVQVK</b>         | Just<br>chicken | F1P2F0,P15989, |
| <b>QSDEENVNMDSHR</b>         | Just<br>chicken | E1BRC1,        |
| <b>CICNPGYEVDSTGK</b>        | Just<br>chicken | F1NII7,F1NJQ9, |
| <b>LFKEPHGQDIALLK</b>        | Just<br>chicken | F1NWX6,        |
| <b>SFWQHDEPQTPLDR</b>        | Just<br>chicken | F1N8F3,P08250, |
| <b>KSSGADFISFGLVGG RPEFR</b> | Just<br>chicken | F1NAT6,Q6KDZ1, |
| <b>TFLWSVTAER</b>            | Just<br>chicken | F1NIV0,        |
| <b>LTEWTSSNVMEER</b>         | Just<br>chicken | P01012,        |
| <b>LSQKLEEIR</b>             | Just<br>chicken | F1N8F3,P08250, |
| <b>RLGVYEVEDQISAVK</b>       | Just<br>chicken | F1NDP3,        |
| <b>RVSVPGLNPISAK</b>         | Just<br>chicken | F1NV02,Q197X2, |
| <b>CECVDGYQFAADGR</b>        | Just<br>chicken | F1NP23,        |

|                                           |                 |                                         |
|-------------------------------------------|-----------------|-----------------------------------------|
| <b>CCQLPEDRR</b>                          | Just<br>chicken | F2Z4L6,                                 |
| <b>DAFQALAE LR</b>                        | Just<br>chicken | F1NVG0,                                 |
| <b>ADQVCVNL R</b>                         | Just<br>chicken | E1C6M8,                                 |
| <b>VVGPLTYSK</b>                          | Just<br>chicken | P51890,                                 |
| <b>LSCTAHSPVK</b>                         | Just<br>chicken | Q98923,Q98922,Q90880,Q90989,Q9892<br>1, |
| <b>TCTSDASTHFR</b>                        | Just<br>chicken | F1NK40,                                 |
| <b>MGLEASPGSLCAIR</b>                     | Just<br>chicken | F1NK40,                                 |
| <b>VAIMAQSR</b>                           | Just<br>chicken | F1P2F0,P15989,                          |
| <b>RPPVPEDIDTFAVAR</b>                    | Just<br>chicken | E1BZN8,                                 |
| <b>IAQLESHCQEPCKDTAEIQETTGR</b>           | Just<br>chicken | F1NSM9,E1BV78,O93568,                   |
| <b>AVQLGLGPFYCR</b>                       | Just<br>chicken | E1BZN8,                                 |
| <b>GWGPNCEVCPFGTVAFK</b>                  | Just<br>chicken | F1NII7,F1NJQ9,                          |
| <b>MPQLTSAELIK</b>                        | Just<br>chicken | E1C1G2,E1BV96,                          |
| <b>SLQFVDWCPTGFK</b>                      | Just<br>chicken | P08070,F1NIN6,F1NMP4,F1NMP3,            |
| <b>RQPPNVDEAIEIPGYQVPIIVVPS<br/>YPHSR</b> | Just<br>chicken | F1NJT3,F1NJT4,P11722,                   |
| <b>AELTKDLEEVKEK</b>                      | Just<br>chicken | F1N8F3,P08250,                          |

|                           |                 |                                                   |
|---------------------------|-----------------|---------------------------------------------------|
| <b>ANVEILR</b>            | Just<br>chicken | F1NJD5,                                           |
| <b>ASLLQHTGAAGAFEGTFR</b> | Just<br>chicken | O57484,                                           |
| <b>VVETNYDEYALVATQISK</b> | Just<br>chicken | Q8QFM7,                                           |
| <b>IAHSEKEFLDQLESAR</b>   | Just<br>chicken | Q5ZK45,F1NYK3,                                    |
| <b>YYDQDLSCEVVELPYK</b>   | Just<br>chicken | F1NPN5,                                           |
| <b>GPPGPSGPPGKDGR</b>     | Just<br>chicken | P02467,F1POH9,F1NCR0,                             |
| <b>EGHSYSVASSQQELQR</b>   | Just<br>chicken | F1NDL4,                                           |
| <b>VSENLQQLVLYIK</b>      | Just<br>chicken | F1NV02,F1NRG6,Q197X2,                             |
| <b>FNPSAILLSVPQR</b>      | Just<br>chicken | F1NHU4,F1NTQ4,                                    |
| <b>TPVLAAFLHGISNKK</b>    | Just<br>chicken | P02845,F1NV01,F1NFL6,E1BYN6,                      |
| <b>CVDVDECQTGVHR</b>      | Just<br>chicken | F1NWN4,                                           |
| <b>LRDADVEIFAVGVK</b>     | Just<br>chicken | P13944,F1NKN1,F1NM33,F1NX22,                      |
| <b>GGNTMTGEAIDYLVK</b>    | Just<br>chicken | P13944,F1NKN1,F1NM33,F1NX22,                      |
| <b>TVEVLDTDYK</b>         | Just<br>chicken | E1COK3,P21760,F6JXW5,F6JXX0,E1BTW6,E1COK0,E1COK1, |
| <b>ITGVVGPYQQLSTLEEK</b>  | Just<br>chicken | F1NJ23,                                           |
| <b>DGTMTVDGGAPVQR</b>     | Just<br>chicken | F1NAT6,                                           |

|                               |                 |                                         |
|-------------------------------|-----------------|-----------------------------------------|
| <b>GYESLLEK</b>               | Just<br>chicken | P19121,F2Z4L6,                          |
| <b>SEVEISGIGPK</b>            | Just<br>chicken | F1P350,P87498,E1BY96,                   |
| <b>ITQVGSlyHEDLPITLSAALR</b>  | Just<br>chicken | O42273,                                 |
| <b>GLGLSPFHEYADVFTANDSGHR</b> | Just<br>chicken | F1NMT4,P27731,                          |
| <b>FLAWNAGALHYSDSVVIK</b>     | Just<br>chicken | F1NFE0,P20785,F1NBG1,                   |
| <b>INNVEVDGTMKY</b>           | Just<br>chicken | F1NLV8,Q91048,                          |
| <b>VPGTSSSATLTGLTR</b>        | Just<br>chicken | F1NJT3,F1NJT4,P11722,                   |
| <b>IVSLDDDLMIK</b>            | Just<br>chicken | F1NEQ4,                                 |
| <b>VFEYSEYWEGAR</b>           | Just<br>chicken | Q8JHF6,                                 |
| <b>AALEGLADTEAR</b>           | Just<br>chicken | Q6PVZ1,F1NPR7,F1NDPO,                   |
| <b>VADPIEVGIAAEGQLQEMFVR</b>  | Just<br>chicken | F1P350,P87498,E1BY96,                   |
| <b>TGGLQLVVYADTDSVRPR</b>     | Just<br>chicken | P02845,Q6BCB8,F1NV01,F1NFL6,E1BYN6<br>, |
| <b>IEPSPETLSCGSSAEVR</b>      | Just<br>chicken | E1C544,                                 |
| <b>SNQLPLVIEFTEQTAPK</b>      | Just<br>chicken | P09102,F1N9H3,                          |
| <b>TVCDCKEPFVGK</b>           | Just<br>chicken | E1BZN8,                                 |
| <b>FMQFSQEQGLK</b>            | Just<br>chicken | Q8QFM7,                                 |

|                             |                 |                                                   |
|-----------------------------|-----------------|---------------------------------------------------|
| <b>VTNYVNWINER</b>          | Just<br>chicken | E1BZN8,                                           |
| <b>TVAVYSEQDTGQMHR</b>      | Just<br>chicken | Q8JHF6,                                           |
| <b>DLLFKDSAIMLK</b>         | Just<br>chicken | Q4ADG4,E1BQC2,Q4ADJ6,P02789,E1BS66,Q4ADJ7,F1NL17, |
| <b>VQVVTGSAYTQPCQTCQQR</b>  | Just<br>chicken | F1P350,P87498,E1BY96,                             |
| <b>NAMYIIEGESANTIFK</b>     | Just<br>chicken | Q8AYD0,F1P1Y9,                                    |
| <b>GFESEPIGILK</b>          | Just<br>chicken | F1N8F5,P10039,Q90995,F1N8F4,Q90994,F1N8F6,Q90824, |
| <b>MMSNLCSQQDVFSGK</b>      | Just<br>chicken | P19121,F2Z4L6,                                    |
| <b>VVDLMVHMASKE</b>         | Just<br>chicken | F1NH87,P00356,F1NK14,                             |
| <b>VSVVQYSGR</b>            | Just<br>chicken | F1NFE0,P20785,F1NBG1,                             |
| <b>EHMGLDISDATVIMK</b>      | Just<br>chicken | F1NV02,Q197X2,                                    |
| <b>ALEEANTDLEVK</b>         | Just<br>chicken | Q6PVZ1,F1NPR7,F1NDP0,                             |
| <b>NFLSLNYLAGYLQPK</b>      | Just<br>chicken | Q90998,                                           |
| <b>TTVVVHVTPSFQGK</b>       | Just<br>chicken | Q98UI9,F1NZY2,                                    |
| <b>LLSYVDSGPNIGVVQMTFLR</b> | Just<br>chicken | F1NR02,Q9IAU4,F1NR03,Q90689,F1NR01,F1NI79,F1NR10, |
| <b>MNYLDILVR</b>            | Just<br>chicken | P26007,F1P0M0,F1P0B0,                             |
| <b>LVIESMGINIPSQEYR</b>     | Just<br>chicken | F1NV02,Q197X2,                                    |

|                                         |                 |                                            |
|-----------------------------------------|-----------------|--------------------------------------------|
| <b>VHHANENIFYCPIAIMSALAMVY<br/>LGAK</b> | Just<br>chicken | P01012,                                    |
| <b>AIANNEADAISLDGGQVFEAGLA<br/>PYK</b>  | Just<br>chicken | Q4ADG4,E1BQC2,Q4ADJ6,E1BS66,Q4ADJ7,F1NL17, |
| <b>FLLLLPSNVVQDSGR</b>                  | Just<br>chicken | E1C544,                                    |
| <b>FFGLPETGDLQNTIETMK</b>               | Just<br>chicken | Q90611,                                    |
| <b>YGCGNYGASR</b>                       | Just<br>chicken | P08940,F1NEF7,F1NXC3,                      |
| <b>IADFDLPTITIQK</b>                    | Just<br>chicken | F1NV02,Q197X2,                             |
| <b>VGDQWDKQHDMGHMMR</b>                 | Just<br>chicken | F1NJT3,                                    |
| <b>LSESVLAYTFQVK</b>                    | Just<br>chicken | E1C6U2,F1DQG4,                             |
| <b>IREILNMAQYQPSR</b>                   | Just<br>chicken | F1NV02,Q197X2,                             |
| <b>LLVAELNAR</b>                        | Just<br>chicken | F1P4I7,E1BUA7,Q5ZHM4,                      |
| <b>TVQVSMMSDPK</b>                      | Just<br>chicken | E1C7H6,                                    |
| <b>GLTSVKPCYNYCFNVMR</b>                | Just<br>chicken | F1NAU1,                                    |
| <b>VEDHSGVYECIYNTNPVAK</b>              | Just<br>chicken | F1NMG0,F1NL31,P17790,                      |
| <b>FLQTNTLLGHLMGK</b>                   | Just<br>chicken | F1NZZ2,                                    |
| <b>LDQASLSLSSR</b>                      | Just<br>chicken | E1BR88,O93586,F1NN42,E1BXR4,               |
| <b>RHLTNPINPAVCHCCSSSYALR</b>           | Just<br>chicken | E1C1G2,E1BV96,P84407,                      |

|                                             |                 |                                                   |
|---------------------------------------------|-----------------|---------------------------------------------------|
| <b>IMKGEADAVALDGGLVYTAGVC<br/>GLVPVMAER</b> | Just<br>chicken | Q4ADG4,E1BQC2,Q4ADJ6,P02789,E1BS66,Q4ADJ7,F1NL17, |
| <b>EQLEEFEAQLR</b>                          | Just<br>chicken | Q8JIG5,F1P2P7,A7UEB0,                             |
| <b>DTFPVLIMEK</b>                           | Just<br>chicken | O73790,                                           |
| <b>LDFLVFSVIADSHILAPEMK</b>                 | Just<br>chicken | Q197X2,                                           |
| <b>TVAVYGQYGGNPCSGDAFETRP<br/>CTPTR</b>     | Just<br>chicken | E1C6U2,F1DQG4,                                    |
| <b>TKNEGKEETNIDEAEK</b>                     | Just<br>chicken | Q5ZLZ6,                                           |
| <b>ICHSGSGLVGR</b>                          | Just<br>chicken | F1NGP2,Q9YGP0,F1N8Q8,                             |
| <b>ELYHYSSAVTSSAHR</b>                      | Just<br>chicken | F1NDL4,                                           |
| <b>RWLLSAVSASGTTETLK</b>                    | Just<br>chicken | P02845,Q6BCB8,F1NV01,F1NFL6,E1BYN6                |
| <b>FTDLGEEEEDDFGGLQPSGFAAG<br/>SASHK</b>    | Just<br>chicken | ,<br>F1P4V1,P14448,                               |
| <b>SYAVIFATR</b>                            | Just<br>chicken | E1C0K3,P21760,F6JXX0,E1BTW6,E1C0K0,E1C0K1,        |
| <b>VAVVGAGISGLAATK</b>                      | Just<br>chicken | Q4L2A7,Q8QH01,E1C6W7                              |
| <b>VLDFHNLDPGITR</b>                        | Just<br>chicken | ,<br>F1NR02,Q9IAU4,F1NR03,F1NR01,Q90589           |
| <b>TSDDGEVYYSEEA EK</b>                     | Just<br>chicken | ,<br>E1C0K3,E1BTW6,E1C0K0,E1C0K1,                 |
| <b>FFASFGNLSSPTAIMGNPR</b>                  | Just<br>chicken | F1NMZ3,P02128,                                    |
| <b>IRSEVEISGIGPK</b>                        | Just<br>chicken | F1P350,P87498,E1BY96,                             |



|                              |                 |                                                   |
|------------------------------|-----------------|---------------------------------------------------|
| <b>LGPDWVK</b>               | Just<br>chicken | F1NTM6,F1NWR2,Q90997<br>,                         |
| <b>DNEENIFLSPLSISTAFAMTK</b> | Just<br>chicken | Q91422,                                           |
| <b>AFVAIEER</b>              | Just<br>chicken | F1NK40,                                           |
| <b>VGPMTQMAFTIK</b>          | Just<br>chicken | F1N9I4,                                           |
| <b>QQLTLVEVR</b>             | Just<br>chicken | P02845,Q6BCB8,F1NV01,F1NFL6,E1BYN6<br>,           |
| <b>LVPFATELQAQLVQDSQR</b>    | Just<br>chicken | O93601,                                           |
| <b>LRDEGVELYAIGIK</b>        | Just<br>chicken | P13944,F1NKN1,F1NM33,F1NX22,                      |
| <b>IPQTLNIMPFDVNLPTLPK</b>   | Just<br>chicken | F1NV02,Q197X2,                                    |
| <b>GGPVEGLDFSEYQPELFER</b>   | Just<br>chicken | F1P2F0,P15989,                                    |
| <b>GILNILELSLKK</b>          | Just<br>chicken | F1P350,P87498,E1BY96,                             |
| <b>TPGDVDITDVAYYFEK</b>      | Just<br>chicken | Q5F381,F1NV09,                                    |
| <b>VDVSVETAQR</b>            | Just<br>chicken | F1NAT6,Q6KDZ1,                                    |
| <b>GLILHGLPGK</b>            | Just<br>chicken | E1BYN5,F1NY78,Q91025,E1BZD1,                      |
| <b>LEELEGLVSSLR</b>          | Just<br>chicken | F1N8F5,P10039,Q90995,F1N8F4,Q90994,F1N8F6,Q90824, |
| <b>SDCSLCLAAHEDYK</b>        | Just<br>chicken | E1BST4,                                           |
| <b>TIFEEVQDGK</b>            | Just<br>chicken | F1NPR7,                                           |

|                                       |                 |                                         |
|---------------------------------------|-----------------|-----------------------------------------|
| <b>KFYTGGVEEVNFK</b>                  | Just<br>chicken | P01014,F1NJA4,                          |
| <b>AADFGPGPMGLMGPR</b>                | Just<br>chicken | P02467,F1POH9,F1NCR0,                   |
| <b>SGNLQYDLHFWLGDESSQDER</b>          | Just<br>chicken | F1NKF3,O93510,                          |
| <b>FLPISSSSAADIPVHIQIDAITALKK</b>     | Just<br>chicken | P02845,Q6BCB8,F1NV01,F1NFL6,E1BYN6<br>, |
| <b>NIGVEVFSLGIK</b>                   | Just<br>chicken | P13944,F1NKN1,F1NM33,F1NX22,            |
| <b>LQSLDLAEASAK</b>                   | Just<br>chicken | F1NJ23,                                 |
| <b>CGPGLVLLGSAVR</b>                  | Just<br>chicken | P81475,                                 |
| <b>LIAPEEINIEITSPSLK</b>              | Just<br>chicken | F1NGT5,                                 |
| <b>TSGLCGNFNNIQTDDFR</b>              | Just<br>chicken | Q98UI9,F1NZY2,                          |
| <b>YENTILAHENTIQQLTDMHIMNS<br/>NK</b> | Just<br>chicken | F1NSM9,E1BV78,O93568,                   |
| <b>GVDEVTIINILTNR</b>                 | Just<br>chicken | P17785,                                 |
| <b>YSEELLAYQEEFLPYIK</b>              | Just<br>chicken | F1NTM6,F1NWR2,Q90997<br>,               |
| <b>VFSAMIDPLEIK</b>                   | Just<br>chicken | E1C7T1,                                 |
| <b>SGVEMNSNIFHESGIEAHVSVK</b>         | Just<br>chicken | F1NV02,Q197X2,                          |
| <b>LSVISSMVASAK</b>                   | Just<br>chicken | E1BXK1,Q6PVZ6,F1NI23,                   |
| <b>CVANEDAPECSK</b>                   | Just<br>chicken | P19121,F2Z4L6,                          |

|                                    |                 |                              |
|------------------------------------|-----------------|------------------------------|
| <b>STLLSISTGVAAQK</b>              | Just<br>chicken | F1NSZ5,                      |
| <b>PASDVICQEYQDNR</b>              | Just<br>chicken | P19121,F2Z4L6,               |
| <b>CQPGTGLGYTCECAAGYR</b>          | Just<br>chicken | F1NDL4,                      |
| <b>AATNSENVGNIEEK</b>              | Just<br>chicken | F1NJ23,                      |
| <b>VDVQLVVVQLAETNWK</b>            | Just<br>chicken | F1P350,P87498,E1BY96,        |
| <b>RVPGTQTALELGLDLR</b>            | Just<br>chicken | F1NBA6,                      |
| <b>CSCFPEFTLQEDGTSCSPDPDR</b>      | Just<br>chicken | F1NWN4,                      |
| <b>MTPVLLPEAVPDIMK</b>             | Just<br>chicken | F1P350,P87498,E1BY96,        |
| <b>AFALYDGHEQVLR</b>               | Just<br>chicken | F1NDL4,                      |
| <b>AAVWNSFVSDGVK</b>               | Just<br>chicken | Q90633,                      |
| <b>SQDDVVTPSR</b>                  | Just<br>chicken | P13944,F1NKN1,F1NM33,F1NX22, |
| <b>QLPHYVEPSNEELCEAFK</b>          | Just<br>chicken | Q9W6F5,F1NVF3,               |
| <b>GFISPFERPNAEAACK</b>            | Just<br>chicken | E1C1G2,E1BV96,P84407,        |
| <b>FEALQVTAGK</b>                  | Just<br>chicken | O93532,                      |
| <b>TDKELAVQYLNK</b>                | Just<br>chicken | Q90611,                      |
| <b>EDQWMGVTVQSQGGNVVT<br/>CAHR</b> | Just<br>chicken | P26007,F1P0M0,F1P0B0,        |

|                                            |                 |                                         |
|--------------------------------------------|-----------------|-----------------------------------------|
| <b>DMATQLAFMR</b>                          | Just<br>chicken | P02467,F1P0H9,F1NCR0,                   |
| <b>VLVFS DGNSQGITAR</b>                    | Just<br>chicken | F1NFE0,P20785,F1N BG1,                  |
| <b>YDAECEQEYR</b>                          | Just<br>chicken | P02845,F1NFL6,E1BYN6,                   |
| <b>LVLEVAQHLGENTVR</b>                     | Just<br>chicken | Q5ZLC5,                                 |
| <b>GPGDLPPSNLVISEVTPHSFR</b>               | Just<br>chicken | P13944,F1NKN1,F1NM33,F1NX22,            |
| <b>GALESTLADTEGR</b>                       | Just<br>chicken | O93256,F1NDN9,                          |
| <b>IVCQVGEMK</b>                           | Just<br>chicken | E1BST4,                                 |
| <b>ITCPDIDGFYPASVTPTVK</b>                 | Just<br>chicken | E1C117,                                 |
| <b>LLQVTAADSGEYVCR</b>                     | Just<br>chicken | Q6KDZ1,                                 |
| <b>KLTEVFPQLLDK</b>                        | Just<br>chicken | F1NSZ5,                                 |
| <b>GETGPTGAIGPIGASGPPGPVGA<br/>AGPAGPR</b> | Just<br>chicken | P02467,F1P0H9,F1NCR0,                   |
| <b>IEKFDLVPVPK</b>                         | Just<br>chicken | F1NKF3,O93510,                          |
| <b>AMTLIMNSR</b>                           | Just<br>chicken | Q9W6F5,F1NVF3,                          |
| <b>LSQLESTMQIR</b>                         | Just<br>chicken | P02845,Q6BCB8,F1NV01,F1NFL6,E1BYN6<br>, |
| <b>ALGCIIPSLPK</b>                         | Just<br>chicken | F1NIV0,                                 |
| <b>APDGLLLFSAGK</b>                        | Just<br>chicken | F1NAT6,Q6KDZ1,                          |

|                                |                 |                                         |
|--------------------------------|-----------------|-----------------------------------------|
| <b>LLINLIKR</b>                | Just<br>chicken | P19121,F2Z4L6,                          |
| <b>GQVLPAAHTLLNTVDVELIYEGR</b> | Just<br>chicken | F1NNT2,F1P5V8,F1NWT0,P11029,Q9890<br>9, |
| <b>IAQLESHCQEPCK</b>           | Just<br>chicken | F1NSM9,E1BV78,O93568,                   |
| <b>DAIAQFESSAVGK</b>           | Just<br>chicken | F1N8F3,P08250,                          |
| <b>EALGSELQSLDVVFLVLAK</b>     | Just<br>chicken | F1NK40,                                 |
| <b>WYIVALASNTDFFLR</b>         | Just<br>chicken | P21760,F6JXW3,                          |
| <b>LFSDLVAEEFIDK</b>           | Just<br>chicken | P15988,                                 |
| <b>IVFYLVMAK</b>               | Just<br>chicken | E1C544,                                 |
| <b>LESGTAGVEDHLDLLEK</b>       | Just<br>chicken | O93601,                                 |
| <b>ISFDEFISIFQNLK</b>          | Just<br>chicken | Q5ZLW0,                                 |
| <b>LLSDPLVSPVMDK</b>           | Just<br>chicken | E1BYPO,                                 |
| <b>SLGGQEELAR</b>              | Just<br>chicken | F1NZZ2,                                 |
| <b>ATVFNYLTACIR</b>            | Just<br>chicken | E1C544,                                 |
| <b>AQSSSVAMLEPPSNR</b>         | Just<br>chicken | E1BRP7,Q6B0K7,E1BT59,                   |
| <b>LGVYEVEDQISAVKK</b>         | Just<br>chicken | F1NDP3,                                 |
| <b>IISPTVGDPIDEYTTVPGIR</b>    | Just<br>chicken | P13944,F1NKN1,F1NM33,F1NX22,            |

|                                |                 |                                                   |
|--------------------------------|-----------------|---------------------------------------------------|
| <b>IIETLQHIVLNNQQDFHDDVSYR</b> | Just<br>chicken | F1NV01,F1NFL6,E1BYN6,                             |
| <b>LALETLSYLSVETSTK</b>        | Just<br>chicken | F1NV02,Q197X2,                                    |
| <b>MGPGQHLQDNVK</b>            | Just<br>chicken | F1NAT6,Q6KDZ1,                                    |
| <b>EGGGQAMVDTCR</b>            | Just<br>chicken | F1NJD7,                                           |
| <b>AQVFAVVITDGR</b>            | Just<br>chicken | P15988,                                           |
| <b>WFYTYLPGAAYMLGYSQK</b>      | Just<br>chicken | E1BYN5,E1BZD1,                                    |
| <b>CEPHETTCYDDGK</b>           | Just<br>chicken | F1NJT3,                                           |
| <b>VDSGIEQGS DISIYYDPMISK</b>  | Just<br>chicken | E1BR16,F1POM2,                                    |
| <b>TILGTPEVLLGLLPGAGATQR</b>   | Just<br>chicken | O57660,F1NI29,                                    |
| <b>KTDFLQEGEPTSAR</b>          | Just<br>chicken | F1N8N7,P07228,                                    |
| <b>FLPANPTAFTIEGLR</b>         | Just<br>chicken | F1NBA6,                                           |
| <b>AIYINQSR</b>                | Just<br>chicken | E1BQ57,                                           |
| <b>DDNKVEDIWSFLSK</b>          | Just<br>chicken | Q4ADG4,E1BQC2,Q4ADJ6,P02789,E1BS66,Q4ADJ7,F1NL17, |
| <b>AMLTQLLSR</b>               | Just<br>chicken | E1BXK1,Q6PVZ6,F1NI23,                             |
| <b>IPEIIAQAIK</b>              | Just<br>chicken | F1NV02,Q197X2,                                    |
| <b>KPLDWIFLNTICQEDNLPR</b>     | Just<br>chicken | E1C1G2,E1BV96,P84407,                             |

|                                               |                 |                       |
|-----------------------------------------------|-----------------|-----------------------|
| <b>IQYISWSPVGHK</b>                           | Just<br>chicken | F1NDP3,               |
| <b>AVDSSVLLMKPEADLSHSSVYSLL<br/>PVK</b>       | Just<br>chicken | E1C544,               |
| <b>VGINIFTR</b>                               | Just<br>chicken | P02701,               |
| <b>EINLSPDSTSAVVVSGLMVATK</b>                 | Just<br>chicken | F1NJT3,F1NJT4,P11722, |
| <b>AFLSQEGADPESIEVVASR</b>                    | Just<br>chicken | E1C700,O57484,F1NX80, |
| <b>ELPSVLLSPTCHDAAVEEAADLAL<br/>R</b>         | Just<br>chicken | E1BQ57,               |
| <b>SMDAVEQAAAEMKR</b>                         | Just<br>chicken | F1P2F0,P15989,        |
| <b>LLGTLVPLMTR</b>                            | Just<br>chicken | F1NBA6,               |
| <b>AITPTYPANQADIIFDITEGNLR</b>                | Just<br>chicken | F1NX60,O73775,        |
| <b>TRGPYFLTAETLK</b>                          | Just<br>chicken | F1P2F0,P15989,        |
| <b>DNTASVLVR</b>                              | Just<br>chicken | O93319,F1P1Y0,        |
| <b>ITVEDADEPPVFLKPSYIFEVQEN<br/>AASGTVVGK</b> | Just<br>chicken | O93319,F1P1Y0,        |
| <b>YCECDNFNCDR</b>                            | Just<br>chicken | F1N8N7,P07228,        |
| <b>IVILAVGSR</b>                              | Just<br>chicken | F1P2F0,P15989,        |
| <b>LISSLQTGIGR</b>                            | Just<br>chicken | F1P350,P87498,E1BY96, |
| <b>ISFLGEDELEVSYAAPSPK</b>                    | Just<br>chicken | P21760,               |

|                                           |                 |                              |
|-------------------------------------------|-----------------|------------------------------|
| <b>ISVYAAAYSSGEGDPVEGEAFTDVS<br/>QSAR</b> | Just<br>chicken | F1NKN1,F1NM33,F1NX22,        |
| <b>MVGLPAAFDMMLTGR</b>                    | Just<br>chicken | O57660,F1NI29,               |
| <b>GYEDLLDECCK</b>                        | Just<br>chicken | E1C1G2,E1BV96,P84407,        |
| <b>TVTVDNETENTMR</b>                      | Just<br>chicken | P13944,F1NKN1,F1NM33,F1NX22, |
| <b>GLPYTGTMQLK</b>                        | Just<br>chicken | F1NK40,                      |
| <b>AYTFVIDFNKK</b>                        | Just<br>chicken | F1NV02,                      |
| <b>ALEEAIEQK</b>                          | Just<br>chicken | F1NCD4,P14105,               |
| <b>CVANEDAPECSKPLPSIILDEICQV<br/>EK</b>   | Just<br>chicken | P19121,F2Z4L6,               |
| <b>TPVLA AFLHGISNNK</b>                   | Just<br>chicken | P02845,F1NV01,F1NFL6,E1BYN6, |
| <b>DYTPEVHAAFDK</b>                       | Just<br>chicken | P02001,E1C4M2,               |
| <b>QLLGDVTTIPDVS GEEK</b>                 | Just<br>chicken | F1P2F0,P15989,               |
| <b>INILYTR</b>                            | Just<br>chicken | Q5ZK45,F1NYK3,               |
| <b>IHETSSTPEEVTETIR</b>                   | Just<br>chicken | E1C544,                      |
| <b>CVSSTPAGSIEGYAR</b>                    | Just<br>chicken | F1NLV8,Q91048,               |
| <b>IYIFITAHTY</b>                         | Just<br>chicken | F1NWN4,                      |
| <b>LQDLVETTYEQLPSDAPAK</b>                | Just<br>chicken | F1P350,P87498,E1BY96,        |



|                                             |                 |                              |
|---------------------------------------------|-----------------|------------------------------|
| <b>ISELQANIVNLLK</b>                        | Just<br>chicken | F1P2F0,P15989,               |
| <b>APSVHGGSSSYVSSR</b>                      | Just<br>chicken | Q6PVZ1,F1NPR7,F1NDP0,        |
| <b>HNPTNTIVYFGR</b>                         | Just<br>chicken | P01013,F1NHK4,               |
| <b>TPVLFLR</b>                              | Just<br>chicken | F1NJD5,                      |
| <b>TLDLEQCTDSSDYVK</b>                      | Just<br>chicken | F1NLW7,                      |
| <b>DLADELTLVDVVEDK</b>                      | Just<br>chicken | P00340,F1NW35,E1BTT8,        |
| <b>NMVFSDVTSDSFK</b>                        | Just<br>chicken | P13944,F1NKN1,F1NM33,F1NX22, |
| <b>LENLVLLDLHHNK</b>                        | Just<br>chicken | E1C7T4,                      |
| <b>STNYDVAYGER</b>                          | Just<br>chicken | F1NFE0,P20785,F1NBG1,        |
| <b>AEIVDIASQCK</b>                          | Just<br>chicken | E1BX43,                      |
| <b>LLPCAENLDLVLGEICR</b>                    | Just<br>chicken | E1C1G2,E1BV96,               |
| <b>IETSSASVTEGQTLNLCMVAGQ<br/>GHPQVTWYR</b> | Just<br>chicken | Q6KDZ1,                      |
| <b>IKENLEQLK</b>                            | Just<br>chicken | F1NV02,Q197X2,               |
| <b>IGKGYEDLLDECCK</b>                       | Just<br>chicken | E1C1G2,E1BV96,P84407,        |
| <b>NMLVYDPTTSTLNVR</b>                      | Just<br>chicken | P13944,F1NKN1,F1NM33,F1NX22, |
| <b>LYGPASINFADDFVK</b>                      | Just<br>chicken | P13731,                      |

|                                         |                 |                                                   |
|-----------------------------------------|-----------------|---------------------------------------------------|
| <b>DLTPETEYIVNVFSVVEDESSEPLI<br/>GR</b> | Just<br>chicken | P13944,F1NKN1,F1NM33,F1NX22,                      |
| <b>FLEASKPAEDSVR</b>                    | Just<br>chicken | F1NFE0,P20785,F1NBG1,                             |
| <b>IVSLDKDFIASDK</b>                    | Just<br>chicken | F1NK40,                                           |
| <b>TFAEHAVEGDCDVK</b>                   | Just<br>chicken | E1BZE1,                                           |
| <b>NEDLNQAVQDAR</b>                     | Just<br>chicken | F1NZZ2,                                           |
| <b>LQEYFDALIAAINELEVR</b>               | Just<br>chicken | F1NV02,F1NRG6,                                    |
| <b>ATPLEVVCQAALGLILK</b>                | Just<br>chicken | Q5ZK45,F1NYK3,                                    |
| <b>SAEDSTHNLEECFR</b>                   | Just<br>chicken | E1C1G2,E1BV96,P84407,                             |
| <b>DYSSKPEILDANK</b>                    | Just<br>chicken | F1P2F0,P15989,                                    |
| <b>SYLNMDAIMEVIK</b>                    | Just<br>chicken | E1BR16,F1POM2,                                    |
| <b>IVLEAELGQDK</b>                      | Just<br>chicken | F1NK22,                                           |
| <b>AATVIQHSGFSVFVGVADVDYN<br/>ELAK</b>  | Just<br>chicken | P13944,F1NKN1,F1NM33,F1NX22,                      |
| <b>VSWSAAGSEVLSYLIK</b>                 | Just<br>chicken | F1NKN1,F1NM33,F1NX22,                             |
| <b>NLQMDDFELLCTDGRR</b>                 | Just<br>chicken | Q4ADG4,E1BQC2,Q4ADJ6,P02789,E1BS66,Q4ADJ7,F1NL17, |
| <b>IAEWLNVK</b>                         | Just<br>chicken | F1NEQ4,                                           |
| <b>TAVPQGSVTLR</b>                      | Just<br>chicken | Q6KDZ1,                                           |

|                             |                 |                                                   |
|-----------------------------|-----------------|---------------------------------------------------|
| <b>EGTTYKEFLGDK</b>         | Just<br>chicken | Q4ADG4,E1BQC2,Q4ADJ6,P02789,E1BS66,Q4ADJ7,F1NL17, |
| <b>VYYSITGQGADSPVGIIFER</b> | Just<br>chicken | P08641,                                           |
| <b>LNLNEFQIPDLK</b>         | Just<br>chicken | F1NV02,Q197X2,                                    |
| <b>GTASFTITGK</b>           | Just<br>chicken | F1NWX6,F1NTX4,Q7LZF3,                             |
| <b>AASHQEEFGAEALTR</b>      | Just<br>chicken | P02001,E1C4M2,                                    |
| <b>VFVSEEGAEREEMLQVLGPK</b> | Just<br>chicken | F1NKF3,O93510,                                    |
| <b>PSESIVVPANTR</b>         | Just<br>chicken | P13944,F1NKN1,F1NM33,F1NX22,                      |
| <b>SETLSTQFTTGLDAPK</b>     | Just<br>chicken | F1N8F5,P10039,Q90995,F1N8F4,Q90994,F1N8F6,Q90824, |
| <b>LYLSNNLLTALPAGIFLPLR</b> | Just<br>chicken | F1N822,                                           |
| <b>MSFKPVYSDVPIEK</b>       | Just<br>chicken | F1P350,P87498,E1BY96,                             |
| <b>VNVEECGAEALAR</b>        | Just<br>chicken | F1NMZ3,E1C3W0,P02127,P02128,                      |
| <b>ELLATAASLYVAEQLR</b>     | Just<br>chicken | F1P0M2,                                           |
| <b>NNFF TSAAGCR</b>         | Just<br>chicken | F1P2F0,P15989,                                    |
| <b>IYGGSVTGGNCK</b>         | Just<br>chicken | P00940,                                           |
| <b>LCQLCQGSGGIPPEK</b>      | Just<br>chicken | Q4ADG4,Q4ADJ6,P02789,Q4ADJ7,                      |
| <b>FVGNIPLVITAK</b>         | Just<br>chicken | E1BXV7,E1BRS7,                                    |

|                                             |                 |                              |
|---------------------------------------------|-----------------|------------------------------|
| <b>YLSVDGFPAVAGVGAVCR</b>                   | Just<br>chicken | F1NZZ2,                      |
| <b>IYQPINGDGPEQSTMVGGR</b>                  | Just<br>chicken | P13944,F1NKN1,F1NM33,F1NX22, |
| <b>DNHVGLSLSAR</b>                          | Just<br>chicken | Q8JIG5,F1P2P7,A7UEB0,        |
| <b>AADQFSLIDFNHNVR</b>                      | Just<br>chicken | F1NIU3,B3VE14,               |
| <b>VIHAGGYSHVYK</b>                         | Just<br>chicken | E1BYN5,E1BZD1,               |
| <b>HVFIVDDFDAFEK</b>                        | Just<br>chicken | P13944,F1NKN1,F1NM33,F1NX22, |
| <b>GLALESTDAK</b>                           | Just<br>chicken | F1NV02,Q197X2,               |
| <b>GPSCQDCDVGYTR</b>                        | Just<br>chicken | Q6KDZ1,                      |
| <b>YLLDLLPAAASHR</b>                        | Just<br>chicken | F1P350,P87498,E1BY96,        |
| <b>ADLPQEMYNCLR</b>                         | Just<br>chicken | P51890,                      |
| <b>VEGRPGASLPPLDFEALSQELGAR</b>             | Just<br>chicken | Q8JHF6,                      |
| <b>LEDAGVYACAASNR</b>                       | Just<br>chicken | F1NAT6,Q6KDZ1,               |
| <b>EYSASANYDLQR</b>                         | Just<br>chicken | F1NV02,Q197X2,               |
| <b>VYFSVIGDILGTALR</b>                      | Just<br>chicken | F1NEW8,                      |
| <b>SKPWGENICNHVEDASVECSGTE<br/>IPEPGPLR</b> | Just<br>chicken | Q98TD1,                      |
| <b>QDFMLEASNR</b>                           | Just<br>chicken | F1NK40,                      |

|                                          |                 |                                                   |
|------------------------------------------|-----------------|---------------------------------------------------|
| <b>KPDEVLDDDDGGSAPLK</b>                 | Just<br>chicken | F1NL31,P17790,                                    |
| <b>AEPLAFTFSHDYR</b>                     | Just<br>chicken | F1NV02,Q197X2,                                    |
| <b>DVTDTTALITWSKPLAEIEGIELTY<br/>GPK</b> | Just<br>chicken | F1N8F5,P10039,Q90995,F1N8F4,Q90994,F1N8F6,Q90824, |
| <b>ILSPVCGTDGFTYDNECGICAHNA<br/>EQR</b>  | Just<br>chicken | F1NFY4,P10184,F1NMN2,F1NUT1,                      |
| <b>ILYASCMNENK</b>                       | Just<br>chicken | E1BR88,O93586,F1NN42,E1BXR4,                      |
| <b>GDGFQCVLGGVVK</b>                     | Just<br>chicken | F1NP23,F1NC71,                                    |
| <b>VYCDMETDNGGWTLIQNR</b>                | Just<br>chicken | F1NUL9,F1P5F9,Q02020,                             |
| <b>LMANSAGSVADLVEVGIR</b>                | Just<br>chicken | P02845,Q6BCB8,F1NV01,F1NFL6,E1BYN6<br>,           |
| <b>KFSQNYQVSK</b>                        | Just<br>chicken | F1NV02,Q197X2,                                    |
| <b>SPQVEEYNGVWPR</b>                     | Just<br>chicken | P02845,F1NFL6,E1BYN6,                             |
| <b>KCCEKPLLQR</b>                        | Just<br>chicken | E1C1G2,E1BV96,P84407,                             |
| <b>LSHVSETYVLHLER</b>                    | Just<br>chicken | F1NIV0,                                           |
| <b>IGVVQFSNNVFPEFYLR</b>                 | Just<br>chicken | F1P2F0,P15989,                                    |
| <b>GFEPTLEALFGEK</b>                     | Just<br>chicken | F1NV02,Q197X2,                                    |
| <b>TITQEVPLTDLSFVDITDSSIGLR</b>          | Just<br>chicken | F1NJT3,F1NJT4,P11722,                             |
| <b>YRFPVLPQMPLQLIK</b>                   | Just<br>chicken | P02845,Q6BCB8,F1NV01,F1NFL6,E1BYN6<br>,           |

|                                        |                 |                              |
|----------------------------------------|-----------------|------------------------------|
| <b>AVILQGSNDVELR</b>                   | Just<br>chicken | P02467,F1P0H9,F1NCR0,        |
| <b>GTWDHGAPDVSLYR</b>                  | Just<br>chicken | P13944,F1NKN1,F1NM33,F1NX22, |
| <b>TGDQQTFFEMVK</b>                    | Just<br>chicken | F1NJD7,                      |
| <b>EYVLPSFEVTLDPQEK</b>                | Just<br>chicken | Q90633,                      |
| <b>AFQPFFVELTLPYSVVR</b>               | Just<br>chicken | E1C544,                      |
| <b>VADLWLSVIPEAGLR</b>                 | Just<br>chicken | O42273,                      |
| <b>QGVLDLSLPLAAEPALGTYTIHVE<br/>GK</b> | Just<br>chicken | F1NK40,                      |
| <b>KVLGALGNAVK</b>                     | Just<br>chicken | P02001,E1C4M2,               |
| <b>GVGTSEDVIEILASR</b>                 | Just<br>chicken | E1C8K3,                      |
| <b>KGLSPYAQEVQDGLNR</b>                | Just<br>chicken | O93601,                      |
| <b>ATVLSYLQQCMK</b>                    | Just<br>chicken | F1NIV0,F1NTK2,               |
| <b>LISFLDELQK</b>                      | Just<br>chicken | F1N8F3,P08250,               |
| <b>ALLQGANIEIR</b>                     | Just<br>chicken | P02457,F1P2H5,               |
| <b>TLEDPSERETNI</b>                    | Just<br>chicken | F1NVU4,                      |
| <b>RFTSNNNVAIVITDGR</b>                | Just<br>chicken | F1NFE0,P20785,F1NBG1,        |
| <b>TYFPHFDLSPGSDQVR</b>                | Just<br>chicken | P02001,E1C4M2,               |

|                                |                 |                                                   |
|--------------------------------|-----------------|---------------------------------------------------|
| <b>EANTGAALEYVVENLFTQAGGSR</b> | Just<br>chicken | F1P2F0,P15989,                                    |
| <b>VVGDLAQFMVQNGLSR</b>        | Just<br>chicken | Q8JHF6,                                           |
| <b>YAMSNSIGPISDGSADISR</b>     | Just<br>chicken | F1NP23,                                           |
| <b>VNQVIGQYQAIDEDTGK</b>       | Just<br>chicken | F1NJD5,                                           |
| <b>GDVAFIQHSTVEENTGGK</b>      | Just<br>chicken | Q4ADG4,Q4ADJ6,P02789,Q4ADJ7,                      |
| <b>SQNVYELQEAGIGGICHAR</b>     | Just<br>chicken | P02845,Q6BCB8,F1NV01,F1NFL6,E1BYN6                |
| <b>EVIVDTLLSR</b>              | Just<br>chicken | ,<br>Q98UI9,F1NZY2,                               |
| <b>FGFCPMAAHEEICTTNDGIMYR</b>  | Just<br>chicken | F1NJT3,                                           |
| <b>NAGVQLAETLR</b>             | Just<br>chicken | E1BYN5,E1BZD1,                                    |
| <b>TVAIHSDVDANAVHVK</b>        | Just<br>chicken | E1BR16,F1POM2,                                    |
| <b>ECNLAEVPTHAVVVRPEK</b>      | Just<br>chicken | Q4ADG4,E1BQC2,Q4ADJ6,P02789,E1BS66,Q4ADJ7,F1NL17, |
| <b>AKLELEAALQK</b>             | Just<br>chicken | O93532,                                           |
| <b>CDNFDLR</b>                 | Just<br>chicken | Q6PPA9,Q90633,                                    |
| <b>TPFAAGSWQGFALVNR</b>        | Just<br>chicken | Q6KDZ1,                                           |
| <b>PVTLSGSEDDLTAINK</b>        | Just<br>chicken | F1NAR5,                                           |
| <b>SIEFINLHPFYK</b>            | Just<br>chicken | F1NEQ4,                                           |

|                               |                 |                                     |
|-------------------------------|-----------------|-------------------------------------|
| <b>DDTTGTLLFIGK</b>           | Just<br>chicken | E1C7H6,                             |
| <b>STGSSNMVLLYSR</b>          | Just<br>chicken | Q8QFM7,                             |
| <b>DYSLWEQAGLK</b>            | Just<br>chicken | F1NV02,Q197X2,                      |
| <b>CECEVGYELDR</b>            | Just<br>chicken | F1NJR4,F1NJR3,P87363,F1NII7,F1NJQ9, |
| <b>TTYDLSVVPIDFGQ GK</b>      | Just<br>chicken | P13944,F1NKN1,F1NM33,F1NX22,        |
| <b>DGVLASVGNMYVAWR</b>        | Just<br>chicken | Q90953,E1BZM6,                      |
| <b>VCSQAYTCCTQEMEER</b>       | Just<br>chicken | F1NAU1,                             |
| <b>DKDQTEGLGEAYISGHVAK</b>    | Just<br>chicken | F1NKF3,O93510,                      |
| <b>AMLFLGR</b>                | Just<br>chicken | F1NDH2,                             |
| <b>VSLTEITLGSEYQSTILGMDNK</b> | Just<br>chicken | F1NV02,Q197X2,                      |
| <b>IYLGNTLVCTCYGGSR</b>       | Just<br>chicken | F1NJT3,                             |
| <b>LDSTGLICIDSLK</b>          | Just<br>chicken | E1C3A6,                             |
| <b>APSPVLSTPEFR</b>           | Just<br>chicken | F1NV02,Q197X2,                      |
| <b>NPDVYLMLEIGR</b>           | Just<br>chicken | E1BZE1,                             |
| <b>HNELLMPNHK</b>             | Just<br>chicken | F1P350,P87498,E1BY96,               |
| <b>HSFLTDESGR</b>             | Just<br>chicken | F1NK40,                             |



|                                             |                 |                                                   |
|---------------------------------------------|-----------------|---------------------------------------------------|
| <b>LYDAGVTPVFLTSR</b>                       | Just<br>chicken | F1P2F0,P15989,                                    |
| <b>LVSDIANMHK</b>                           | Just<br>chicken | E1C1G2,E1BV96,P84407,                             |
| <b>FMMFESQNK</b>                            | Just<br>chicken | Q4ADG4,E1BQC2,Q4ADJ6,P02789,E1BS66,Q4ADJ7,F1NL17, |
| <b>NALGGFASTQDTVVSLQALAQYA<br/>ALIPHEVR</b> | Just<br>chicken | F1NEQ4,                                           |
| <b>VYTYNYESILFSGIPEK</b>                    | Just<br>chicken | F1P350,P87498,E1BY96,                             |
| <b>IAQLPLTEGVSAMFFLPTK</b>                  | Just<br>chicken | E1C7H6,                                           |
| <b>AFLEVNEEGSEASAATAVVISGR</b>              | Just<br>chicken | Q91422,                                           |
| <b>VNLLDLDFELAEQLDNIAER</b>                 | Just<br>chicken | F1P2F0,P15989,                                    |
| <b>LQEVIDKCEDENIQR</b>                      | Just<br>chicken | Q90615,O42094,F1N8Z0,F1NJQ6,E1C0V6<br>,           |
| <b>RIPFTEDNWEDETGAPVSR</b>                  | Just<br>chicken | Q6KDZ1,                                           |
| <b>PQCGGGLLGVR</b>                          | Just<br>chicken | Q90953,E1BZM6,                                    |
| <b>IIASDADEPNHLNSK</b>                      | Just<br>chicken | F1NHU4,F1NTQ4,                                    |
| <b>LQEIYGQLSDSQEK</b>                       | Just<br>chicken | F1NV02,F1NRG6,Q197X2,P11682,                      |
| <b>GSGSATVNLR</b>                           | Just<br>chicken | F1NMG0,F1NL31,P17790,                             |
| <b>GHPAHHAAEDAQGPAASETGK</b>                | Just<br>chicken | F1NG86,                                           |
| <b>GANAVGYTNYPDNVIYR</b>                    | Just<br>chicken | Q8JHF6,                                           |

|                                      |                 |                                         |
|--------------------------------------|-----------------|-----------------------------------------|
| <b>KHIYETESVMK</b>                   | Just<br>chicken | E1C1G2,E1BV96,P84407,                   |
| <b>CFQETIGTQCGK</b>                  | Just<br>chicken | F1N9I4,                                 |
| <b>GLPGESGAVGPAGPIGSR</b>            | Just<br>chicken | P02467,F1P0H9,F1NCRO,                   |
| <b>QETTPINDNVSQCCSSSYANR</b>         | Just<br>chicken | F2Z4L6,                                 |
| <b>ITAAGVVNTVR</b>                   | Just<br>chicken | F1NEW8,                                 |
| <b>IVQPGNSFQEDK</b>                  | Just<br>chicken | Q98UI9,F1NZY2,                          |
| <b>VGSIYAPENCILCINLVR</b>            | Just<br>chicken | E1BYN5,E1BZD1,                          |
| <b>LDAGVLGGMPK</b>                   | Just<br>chicken | F1N822,                                 |
| <b>VNLGMNVGK</b>                     | Just<br>chicken | P00548,F1P4U1,F1NW43,                   |
| <b>EEAFTEAHGAR</b>                   | Just<br>chicken | Q90615,O42094,F1N8Z0,F1NJQ6,E1COV6<br>, |
| <b>TGGLYSCDITSSDTR</b>               | Just<br>chicken | P26007,F1P0M0,F1P0B0,                   |
| <b>TDNPAECYANAQEQLNQHIK</b>          | Just<br>chicken | P19121,F2Z4L6,                          |
| <b>AQLSPLAQELQEALRGDAEAMQ<br/>QR</b> | Just<br>chicken | O93601,                                 |
| <b>AIDASNVYASIIIAVR</b>              | Just<br>chicken | F1NZZ2,                                 |
| <b>EILLHLIDHLVTNYGR</b>              | Just<br>chicken | E1C041,                                 |
| <b>THSFSVEEYVLPK</b>                 | Just<br>chicken | F1NK40,                                 |

|                                      |                 |                                                   |
|--------------------------------------|-----------------|---------------------------------------------------|
| <b>RQGEELHFANIQPSEAGVYVCSC<br/>R</b> | Just<br>chicken | Q6KDZ1,                                           |
| <b>AELEWNSGATAAVGR</b>               | Just<br>chicken | F1NV02,Q197X2,                                    |
| <b>TNYEYAVILMK</b>                   | Just<br>chicken | F1NUF8,                                           |
| <b>ATLTGLRPGTEYGIGVTAVR</b>          | Just<br>chicken | F1N8F5,P10039,Q90995,F1N8F4,Q90994,F1N8F6,Q90824, |
| <b>WTEELEQYR</b>                     | Just<br>chicken | F1N8F3,P08250,                                    |
| <b>YYQINQQWER</b>                    | Just<br>chicken | F1NJT3,                                           |
| <b>LLPDLESFFTHDSVSTSSR</b>           | Just<br>chicken | F1P4V1,P14448,                                    |
| <b>GILNILELSLK</b>                   | Just<br>chicken | F1P350,P87498,E1BY96,                             |
| <b>GTLVEQQSCGR</b>                   | Just<br>chicken | F1NS08,Q92071,                                    |
| <b>LVKDVVDLAQK</b>                   | Just<br>chicken | P19121,F2Z4L6,                                    |
| <b>TPAQFDAEELR</b>                   | Just<br>chicken | E1C344,Q6QAZ9,F1N9S7,Q92108,                      |
| <b>IDAEGLSGLTNLAK</b>                | Just<br>chicken | P28675,E1BRE9,                                    |
| <b>AIQIFLLK</b>                      | Just<br>chicken | F1NZZ2,                                           |
| <b>FSCVCEGYQVVGGR</b>                | Just<br>chicken | E1C6M8,                                           |
| <b>TEIDTPSQMQVTDVQDNSISIR</b>        | Just<br>chicken | F1NJT3,F1NJT4,P11722,                             |
| <b>GQIWLSLDLCK</b>                   | Just<br>chicken | Q98TD1,                                           |

|                                           |                 |                                         |
|-------------------------------------------|-----------------|-----------------------------------------|
| <b>ITKDDHAICTTEYSR</b>                    | Just<br>chicken | F1NZZ2,                                 |
| <b>VQVLELPYKGDDITMVLVLPK</b>              | Just<br>chicken | F1NLP7,Q91422,F1NLP6,                   |
| <b>LVSDIANMHKDCCR</b>                     | Just<br>chicken | E1C1G2,E1BV96,P84407,                   |
| <b>YVVPSCGLPLEYGSYTTALAR</b>              | Just<br>chicken | P02845,Q6BCB8,F1NV01,F1NFL6,E1BYN6<br>, |
| <b>KGYTQQLAYR</b>                         | Just<br>chicken | Q2MV09,Q90633,A6N9E0<br>,               |
| <b>DEYGNTWLTAFFVK</b>                     | Just<br>chicken | F1NIV0,                                 |
| <b>ECPVFPELAFIDTSSGVGR</b>                | Just<br>chicken | F1P2F0,P15989,                          |
| <b>DMPTDVSILLAGAAYFK</b>                  | Just<br>chicken | E1C7H6,                                 |
| <b>ATYSGVSLFSNPVQYWEIQPSAF<br/>R</b>      | Just<br>chicken | E1BQ80,P28675,E1BRE9,                   |
| <b>GILNMFQMTIK</b>                        | Just<br>chicken | P02845,Q6BCB8,F1NV01,F1NFL6,E1BYN6<br>, |
| <b>LTDINDNFPVFK</b>                       | Just<br>chicken | Q8AYD0,F1P1Y9,                          |
| <b>KGGETSEMYIIQPDPFTTPYR</b>              | Just<br>chicken | F1NUL9,F1P5F9,Q02020,                   |
| <b>QGFQLAEDGHSCKDIDECTQSAG<br/>ILCTFR</b> | Just<br>chicken | F1NWN4,                                 |
| <b>LDVAVPHATGRPLALEVEDCTCP<br/>PGYR</b>   | Just<br>chicken | Q6KDZ1,                                 |
| <b>DLWVVLVGR</b>                          | Just<br>chicken | E1C041,                                 |
| <b>ITCMNPSTYQR</b>                        | Just<br>chicken | Q90953,                                 |

|                                       |                 |                                                                                                                  |
|---------------------------------------|-----------------|------------------------------------------------------------------------------------------------------------------|
| <b>NNIEDIPSDYFK</b>                   | Just<br>chicken | E1C7T4,                                                                                                          |
| <b>VITILDEK</b>                       | Just<br>chicken | E1C544,                                                                                                          |
| <b>LLINLIK</b>                        | Just<br>chicken | P19121,F2Z4L6,                                                                                                   |
| <b>CPAGYVLR</b>                       | Just<br>chicken | F1NII7,F1NJQ9,                                                                                                   |
| <b>VRVELMYNPALCSASTTK</b>             | Just<br>chicken | Q90633,                                                                                                          |
| <b>TLAENIADNGGLR</b>                  | Just<br>chicken | E1BR88,E1BXR4,                                                                                                   |
| <b>TTVEFTPR</b>                       | Just<br>chicken | F1NXV6,Q91001,                                                                                                   |
| <b>TEALVNYSPTK</b>                    | Just<br>chicken | F1NV02,Q197X2,                                                                                                   |
| <b>VIFSYLVTGK</b>                     | Just<br>chicken | F1NTK2,                                                                                                          |
| <b>LMGGTALNTGSALDFVR</b>              | Just<br>chicken | F1P2F0,P15989,                                                                                                   |
| <b>AAYEDGFQCDAGWLSAQTVR</b>           | Just<br>chicken | Q90953,E1BZM6,                                                                                                   |
| <b>GVDVICTDGSIVYAPFSGQLSGPI<br/>R</b> | Just<br>chicken | P08940,F1NEF7,F1NXC3,                                                                                            |
| <b>LEPNPDTGILIVSWDR</b>               | Just<br>chicken | F1NJT3,F1NJT4,P11722,                                                                                            |
| <b>GVCVSEGVEFKPGAVVPK</b>             | Just<br>chicken | Q98UI9,F1NZY2,                                                                                                   |
| <b>RIDFSGNMIEEIEDGAFSK</b>            | Just<br>chicken | Q9W6H0,                                                                                                          |
| <b>LACYVTGFYPPEIEVK</b>               | Just<br>chicken | F1C6T9,B6RCN7,Q9TP88,B6RCP0,Q31553,P23068,F1C6X0,E2JF3<br>1,F1C6U0,B6RCP2,B6RCP1,F1C6V3,Q9TP81,Q4U600,B5BS98,B5B |

|                                        |              |                                                                                                                                                                                                                                                                                                                                                                                                                                                                                                                                                                               |
|----------------------------------------|--------------|-------------------------------------------------------------------------------------------------------------------------------------------------------------------------------------------------------------------------------------------------------------------------------------------------------------------------------------------------------------------------------------------------------------------------------------------------------------------------------------------------------------------------------------------------------------------------------|
|                                        |              | SJ8,F1C6W5,B5BSM3,F1NL12,B5BSM5,F1C6T7,B6RCN9,F1C6T8,Q9TP87,Q9TP78,B5BSJ6,F1C6V0,Q4U5Z9,E2JF30,Q9TP77,A5HUL4,F1C6U7,F1C6T6,F1C6W8,E2JF32,Q9TP79,B5BSA0,B6RCP5,Q31410,Q31414,F1C6V2,F1C6W2,Q9TP75,F1C6U8,Q860T3,F1C6W9,F1C6W7,F1NS55,Q9TP83,B6RCN5,F1C6U2,F1C6U5,F1NSZ6,F1C6U4,Q860T5,E2JF33,Q9TP80,B6RCP4,B5BSB2,F1C6V8,Q31413,F1C6W4,B6RCN6,F1C6W1,F1C6V7,F1C6U6,B5BSB4,E5LFW9,F1C6V9,B5BSF4,F1C6V1,Q4U5Z8,B5BSR6,B5BSE2,B6C863,Q9TP74,F1C6W3,B6RCP3,F1C6V6,Q9TP82,F1C6V5,Q6R674,A5HUL2,F1C6W0,Q9TP85,F1C6W6,B5BSI2,Q9TP84,B5BSF6,F1C6V4,Q4U603,Q9TP86,F1C6X1,F1C6U9,Q31398, |
| <b>LQDNADSIQASLGPYAER</b>              | Just chicken | O93601,                                                                                                                                                                                                                                                                                                                                                                                                                                                                                                                                                                       |
| <b>TQNVYELQEAGIEGICQAR</b>             | Just chicken | E1BYN5,E1BZD1,                                                                                                                                                                                                                                                                                                                                                                                                                                                                                                                                                                |
| <b>DSLTSRPAQGVVTTLENVSPPR</b>          | Just chicken | F1NJT3,F1NJT4,P11722,                                                                                                                                                                                                                                                                                                                                                                                                                                                                                                                                                         |
| <b>TNCLLFMGR</b>                       | Just chicken | O73840,F1NJ16,                                                                                                                                                                                                                                                                                                                                                                                                                                                                                                                                                                |
| <b>EFIEDKGICER</b>                     | Just chicken | E1C1G2,E1BV96,P84407,                                                                                                                                                                                                                                                                                                                                                                                                                                                                                                                                                         |
| <b>LAVLAIDESK</b>                      | Just chicken | F1NSZ5,                                                                                                                                                                                                                                                                                                                                                                                                                                                                                                                                                                       |
| <b>SSDTYVMTDVR</b>                     | Just chicken | P42292,F1NL79,                                                                                                                                                                                                                                                                                                                                                                                                                                                                                                                                                                |
| <b>MGSDPAGWLYIHPENGIVTATQ<br/>PLDR</b> | Just chicken | E1C6M9,F1NUS5,P08641,                                                                                                                                                                                                                                                                                                                                                                                                                                                                                                                                                         |
| <b>LAASSEEMR</b>                       | Just chicken | O93601,                                                                                                                                                                                                                                                                                                                                                                                                                                                                                                                                                                       |
| <b>LEDAGTYTCLISDGR</b>                 | Just chicken | F1P2U7,                                                                                                                                                                                                                                                                                                                                                                                                                                                                                                                                                                       |

|                                              |                 |                |
|----------------------------------------------|-----------------|----------------|
| <b>SFVASHIANILDSDEVGIEDLK</b>                | Just<br>chicken | F1NV02,Q197X2, |
| <b>NADLSELER</b>                             | Just<br>chicken | F1P2F0,P15989, |
| <b>ESDVGACLDTK</b>                           | Just<br>chicken | P19121,F2Z4L6, |
| <b>TDGSSLPSHVSHR</b>                         | Just<br>chicken | F1NLV8,Q91048, |
| <b>SPLPAAMLIER</b>                           | Just<br>chicken | F1NLU4,        |
| <b>AVELDPAASQLNSNDAFVLK</b>                  | Just<br>chicken | O93510,        |
| <b>FWITPASEISDSWQPR</b>                      | Just<br>chicken | F1NX21,F1NX20, |
| <b>YAGESFPGIYDAMFDIK</b>                     | Just<br>chicken | E1C7K6,        |
| <b>AIIAQNPAAEPLK</b>                         | Just<br>chicken | F1NJ23,        |
| <b>IGTFDLYFDK</b>                            | Just<br>chicken | E1BS56,        |
| <b>VFVSEEGAEREEMLQVLGPKPSLP<br/>QGASDDTK</b> | Just<br>chicken | F1NKF3,O93510, |
| <b>KVLTSFGDAVK</b>                           | Just<br>chicken | F1N9X1,P02112, |
| <b>QQNAYGGFASTQDTVVALQALAK</b>               | Just<br>chicken | F1NIV0,        |
| <b>LNYNQISDK</b>                             | Just<br>chicken | E1C7T4,        |
| <b>IHYLYLQNNFIDDLPEESFR</b>                  | Just<br>chicken | E1C7T4,        |
| <b>VSGSPTATISWEK</b>                         | Just<br>chicken | Q6KDZ1,        |

|                                                |                 |                              |
|------------------------------------------------|-----------------|------------------------------|
| <b>AGTGTAILELAR</b>                            | Just<br>chicken | F1NTM6,F1NWR2,Q90997<br>,    |
| <b>TEFSLYSYQTK</b>                             | Just<br>chicken | F1P2F0,P15989,               |
| <b>AAYGTDEVR</b>                               | Just<br>chicken | F1NV02,Q197X2,               |
| <b>NNVILQPLQSDTPYK</b>                         | Just<br>chicken | P13944,F1NKN1,F1NM33,F1NX22, |
| <b>SQHIVFDVQVPK</b>                            | Just<br>chicken | F1NIU3,B3VE14,               |
| <b>DLFTCIPFTIPK</b>                            | Just<br>chicken | E1C544,                      |
| <b>DQCIVDGYDQVNQTFHK</b>                       | Just<br>chicken | F1NJT3,                      |
| <b>YQMTDNMISSTVSSPSAGILGFLV<br/>QIETDTLKEK</b> | Just<br>chicken | F1NV02,Q197X2,               |
| <b>LLSISNTLHLVSPAK</b>                         | Just<br>chicken | F1NV02,Q197X2,               |
| <b>GDYYFQNELLLSFTK</b>                         | Just<br>chicken | E1C1G2,E1BV96,               |
| <b>LNPYEIQLYLSR</b>                            | Just<br>chicken | Q5UMH8,F1NYP7,               |
| <b>EFPNLAFIR</b>                               | Just<br>chicken | E1C7T4,                      |
| <b>SAGWNIPIGTLHR</b>                           | Just<br>chicken | P02789,                      |
| <b>NIFFSPLSLSTAFAMLSLGAR</b>                   | Just<br>chicken | E1C7T1,                      |
| <b>DFSALESQIQDTQELLQEETR</b>                   | Just<br>chicken | F1NCD4,P14105,               |
| <b>TSTTLTDLSSQR</b>                            | Just<br>chicken | P13944,F1NKN1,F1NM33,F1NX22, |



|                                         |                 |                       |
|-----------------------------------------|-----------------|-----------------------|
| <b>KGPIYPDAGGCK</b>                     | Just<br>chicken | F1NUL9,F1P5F9,Q02020, |
| <b>ELSAESVYYR</b>                       | Just<br>chicken | F1NEW8,               |
| <b>DQSSDKFSPFAFSTGR</b>                 | Just<br>chicken | Q5ZK45,F1NYK3,        |
| <b>SQSTVTFITVTVK</b>                    | Just<br>chicken | E1C544,               |
| <b>SLSELGLQQDSVR</b>                    | Just<br>chicken | Q8JHF6,               |
| <b>TVQEVQQAGIEVYVLAVGSQVN<br/>EPNVR</b> | Just<br>chicken | F1NFE0,P20785,F1NBG1, |
| <b>DIDSYPSAPYSFSVIDEPK</b>              | Just<br>chicken | F1NJD5,               |
| <b>CLCTPGFSGPR</b>                      | Just<br>chicken | F1NAT6,Q6KDZ1,        |
| <b>CGEGQICHNLPGAYR</b>                  | Just<br>chicken | F1NWN4,               |
| <b>SCRPNVNCVLDPVHTISHTVISL<br/>PTFR</b> | Just<br>chicken | F1NX60,O73775,        |
| <b>LDALLEEIDFLR</b>                     | Just<br>chicken | Q6PVZ4,               |
| <b>TYTITGLQPGNDYK</b>                   | Just<br>chicken | F1NJT3,F1NJT4,P11722, |
| <b>QLQQEAEQAR</b>                       | Just<br>chicken | F1NLU4,               |
| <b>NIFWTDSQLDR</b>                      | Just<br>chicken | F1NP23,Q9I9K4,F1NC71, |
| <b>YSLDYLLGLAK</b>                      | Just<br>chicken | Q8JHF6,               |
| <b>FLHEYVSSYGQAPLPVLLGSTR</b>           | Just<br>chicken | Q9W6F5,F1NVF3,        |

|                                             |                 |                                         |
|---------------------------------------------|-----------------|-----------------------------------------|
| <b>ISCFNYLDCQNTPV</b>                       | Just<br>chicken | F1NWN4,                                 |
| <b>GKPTGPLLVATFWPDLPEKIDAV<br/>YESPQDEK</b> | Just<br>chicken | Q90611,                                 |
| <b>AQALGALQNVQYR</b>                        | Just<br>chicken | P13944,F1NKN1,F1NM33,F1NX22,            |
| <b>YTDGVFSITSASDVQNGLLK</b>                 | Just<br>chicken | F1NV02,Q197X2,                          |
| <b>FESNFNTQATNR</b>                         | Just<br>chicken | B8YJP1,P00698,B8YJT7,B8YJN9,            |
| <b>AAEDTSSILR</b>                           | Just<br>chicken | F1POM2,F1NA84,F1NLY1,E1COD0,            |
| <b>IANADNLESIWR</b>                         | Just<br>chicken | P02845,Q6BCB8,F1NV01,F1NFL6,E1BYN6<br>, |
| <b>YVPPPFNPDMFSFDEK</b>                     | Just<br>chicken | P19121,F2Z4L6,                          |
| <b>ITWDPSTSQITGYR</b>                       | Just<br>chicken | P13944,F1NKN1,F1NM33,F1NX22,            |
| <b>FCFDVFNEMK</b>                           | Just<br>chicken | P01014,F1NJA4,                          |
| <b>NSDIIQIK</b>                             | Just<br>chicken | F1NV02,Q197X2,                          |
| <b>DVTHSTMNVLWDPAPGK</b>                    | Just<br>chicken | P13944,F1NKN1,F1NM33,F1NX22,            |
| <b>AIDVIIDVFHQYSR</b>                       | Just<br>chicken | P28318,                                 |
| <b>TSIQFLGTVYK</b>                          | Just<br>chicken | F1POM2,E1COD0,                          |
| <b>GGNTLTGMALDFILK</b>                      | Just<br>chicken | P13944,F1NKN1,F1NM33,F1NX22,            |
| <b>QVYQISPFNEPTGVAVMEAR</b>                 | Just<br>chicken | P02845,Q6BCB8,F1NV01,F1NFL6,E1BYN6<br>, |

|                                         |                 |                              |
|-----------------------------------------|-----------------|------------------------------|
| <b>DEPKENEINLGEIMSSMK</b>               | Just<br>chicken | P12105,F1NI73,F1NI72,        |
| <b>AAEQAEQIDYQR</b>                     | Just<br>chicken | F1NV02,Q197X2,               |
| <b>VLVTGAAGQIAYSLLYSIAK</b>             | Just<br>chicken | Q5ZME2,                      |
| <b>PNFDPSADVSALDK</b>                   | Just<br>chicken | E1C344,Q6QAZ9,F1N9S7,Q92108, |
| <b>GTEAAAATAVIISFTTSVINHVLK</b>         | Just<br>chicken | O73790,                      |
| <b>HKGVDVICTDGSIVYAPFSGQLSG<br/>PIR</b> | Just<br>chicken | P08940,F1NEF7,F1NXC3,        |
| <b>TCIDINECR</b>                        | Just<br>chicken | F1NX60,O73775,               |
| <b>HAQPTVDLGLAGIR</b>                   | Just<br>chicken | F1NG70,                      |
| <b>IEDSSDLQEFLADMK</b>                  | Just<br>chicken | F1NDH2,                      |
| <b>MVYFMDDFSDLTTLQPQLK</b>              | Just<br>chicken | F1P2F0,P15989,               |
| <b>GAAQNIIPASTGAAK</b>                  | Just<br>chicken | F1NH87,P00356,F1NK14,        |
| <b>HTQVQVLPESGETPLFK</b>                | Just<br>chicken | F1NKF3,O93510,               |
| <b>LTEWTNPNTMEK</b>                     | Just<br>chicken | P01013,F1NHK4,               |
| <b>ATGQCICNEGVEGPR</b>                  | Just<br>chicken | F1NJ23,                      |
| <b>CSSPYSCSECLQVFHVFAGEALGK</b>         | Just<br>chicken | F1P350,P87498,E1BY96,        |
| <b>VDALTDEINFLR</b>                     | Just<br>chicken | O93532,                      |

|                                   |                 |                                                   |
|-----------------------------------|-----------------|---------------------------------------------------|
| <b>VNVAECGAEALAR</b>              | Just<br>chicken | F1N9X2,F1N9X1,P02112,Q90864,                      |
| <b>EITYPLSSVR</b>                 | Just<br>chicken | P13944,F1NKN1,F1NM33,F1NX22,                      |
| <b>HLTQASSIDMHPDFQTTTLSTLK</b>    | Just<br>chicken | F1P4V1,P14448,                                    |
| <b>VFAMAINMVDIKPEVVCGAIK</b>      | Just<br>chicken | Q2MV09,Q90633,A6N9E0<br>,                         |
| <b>HPFLYAPAILSFAVD FEHALQSCCK</b> | Just<br>chicken | P19121,F2Z4L6,                                    |
| <b>QISVLQQQAVEAR</b>              | Just<br>chicken | F1NCD4,P14105,                                    |
| <b>KQETTPINDNVSQCCSSSYANR</b>     | Just<br>chicken | F2Z4L6,                                           |
| <b>LHVRPGMSLEGDDLIAEIE</b>        | Just<br>chicken | Q8JHF6,                                           |
| <b>WSVVSNGDVECTVVDETK</b>         | Just<br>chicken | Q4ADG4,E1BQC2,Q4ADJ6,P02789,E1BS66,Q4ADJ7,F1NL17, |
| <b>RVSIVSEGGQGLTIR</b>            | Just<br>chicken | Q6KDZ1,                                           |
| <b>NAVSGHSWILEEAPCR</b>           | Just<br>chicken | P02845,F1NFL6,E1BYN6,                             |
| <b>TTEASANQIQSNALR</b>            | Just<br>chicken | F1NLU4,                                           |
| <b>TDQLCGQYTELNFLDFK</b>          | Just<br>chicken | Q9W6F5,F1NVF3,                                    |
| <b>VVHGNDAEVGSAPWQVMLYK</b>       | Just<br>chicken | F1NXV6,Q91001,                                    |
| <b>GAIEWEGIESGSVEQAVAK</b>        | Just<br>chicken | Q4ADG4,E1BQC2,Q4ADJ6,P02789,E1BS66,Q4ADJ7,        |
| <b>KDVVFLIDGSDGVR</b>             | Just<br>chicken | F1P2F0,P15989,                                    |

|                                      |                 |                                                   |
|--------------------------------------|-----------------|---------------------------------------------------|
| <b>LDNSFSFDK</b>                     | Just<br>chicken | F1NV02,Q197X2,                                    |
| <b>IETLPCHQEVELAAVR</b>              | Just<br>chicken | E1BYN5,E1BZD1,                                    |
| <b>WCTISSPEEKK</b>                   | Just<br>chicken | Q4ADG4,E1BQC2,Q4ADJ6,P02789,E1BS66,Q4ADJ7,F1NL17, |
| <b>QLIYLSQKYPK</b>                   | Just<br>chicken | P19121,F2Z4L6,                                    |
| <b>LDSSYLQATNHLSGR</b>               | Just<br>chicken | F1NV02,Q197X2,                                    |
| <b>LLAPIETLTADQIR</b>                | Just<br>chicken | F1P2F0,P15989,                                    |
| <b>NWAENLNQFIETGFK</b>               | Just<br>chicken | F1NV02,Q197X2,                                    |
| <b>NDGEGAYEAEHLIK</b>                | Just<br>chicken | F1NSA4,P26009,                                    |
| <b>NAVLQAIR</b>                      | Just<br>chicken | F1P2F0,P15989,                                    |
| <b>VDGLWNSEMK</b>                    | Just<br>chicken | F1NV02,Q197X2,                                    |
| <b>YLGQFPVSFGAIAPFMADLDTT<br/>GR</b> | Just<br>chicken | F1NP23,                                           |
| <b>KATPLEVVCQAALGLIK</b>             | Just<br>chicken | Q5ZK45,F1NYK3,                                    |
| <b>TVAFASTFATFFTR</b>                | Just<br>chicken | F1P1A5,                                           |
| <b>GLPPVQAYLHVPDIIR</b>              | Just<br>chicken | Q8JHF6,                                           |
| <b>EALQPIHDLADEAISR</b>              | Just<br>chicken | P02845,Q6BCB8,F1NV01,F1NFL6,E1BYN6<br>,           |
| <b>DYHYIVFGAPGTYNWK</b>              | Just<br>chicken | P26007,F1P0M0,F1P0B0,                             |

|                                                |                 |                                                   |
|------------------------------------------------|-----------------|---------------------------------------------------|
| <b>KMPQLTSAELIK</b>                            | Just<br>chicken | E1C1G2,E1BV96,                                    |
| <b>YYWGGTYSWDMAK</b>                           | Just<br>chicken | F1NUL9,F1P5F9,Q02020,                             |
| <b>DADVEIFAVGVK</b>                            | Just<br>chicken | P13944,F1NKN1,F1NM33,F1NX22,                      |
| <b>VIVLMITGK</b>                               | Just<br>chicken | F1P2F0,P15989,                                    |
| <b>RPHETGGYLLECVCLGNGK</b>                     | Just<br>chicken | F1NJT3,                                           |
| <b>GFNCESKPEPEETCFDK</b>                       | Just<br>chicken | F1NJT3,                                           |
| <b>ESAPATINAGTDLNPK</b>                        | Just<br>chicken | F1N8F5,P10039,Q90995,F1N8F4,Q90994,F1N8F6,Q90824, |
| <b>NWPICVDDDVGTK</b>                           | Just<br>chicken | F1P4V1,P14448,                                    |
| <b>DFSILNDFR</b>                               | Just<br>chicken | O73840,F1NJ16,                                    |
| <b>VAIVITDGK</b>                               | Just<br>chicken | P13944,F1NKN1,F1NM33,F1NX22,                      |
| <b>ALSGNTQLDLQEINNWVR</b>                      | Just<br>chicken | E1C7H6,                                           |
| <b>ILAESGATAFYEGEIGK</b>                       | Just<br>chicken | E1BYPO,                                           |
| <b>VTLLAPVNEVFKDK</b>                          | Just<br>chicken | O42390,F1P494,                                    |
| <b>GVSGQWALPAVVAELR</b>                        | Just<br>chicken | E1BYN5,E1BZD1,                                    |
| <b>APDCGGILTPLGLSYLAEVSKPHA<br/>EVVLR</b>      | Just<br>chicken | E1BXM5,O42273,E1C1X2,                             |
| <b>YTHNEAVITQAEVEEVHQFPPH<br/>EITGGNAIVEAR</b> | Just<br>chicken | F1P350,P87498,E1BY96,                             |

|                                               |                 |                              |
|-----------------------------------------------|-----------------|------------------------------|
| <b>AQDEVEIPAR</b>                             | Just<br>chicken | P13944,F1NKN1,F1NM33,F1NX22, |
| <b>VISGPDGPREEIVEK</b>                        | Just<br>chicken | F1P4V1,P14448,               |
| <b>SSDAFKEPAIK</b>                            | Just<br>chicken | P13944,F1NKN1,F1NM33,F1NX22, |
| <b>IVETLQHIVLNNQQDFHDDVSYR</b>                | Just<br>chicken | P02845,Q6BCB8,               |
| <b>CGIAVAPVSSWEYYASIYTER</b>                  | Just<br>chicken | F1NDP3,                      |
| <b>ITYGETGGSSPVQEFTVPGTMSR</b>                | Just<br>chicken | F1NJT3,F1NJT4,P11722,        |
| <b>AEADKTFSDVTGLAR</b>                        | Just<br>chicken | F1NK49,                      |
| <b>SQPINSVATTVVGSPK</b>                       | Just<br>chicken | P10039,F1N8F4,Q90824,        |
| <b>IAFNTESTR</b>                              | Just<br>chicken | P01014,F1NJA4,               |
| <b>NLGAGSSSPIVFR</b>                          | Just<br>chicken | E1BXV7,E1BRS7,               |
| <b>KFLPGYAAGASELPLK</b>                       | Just<br>chicken | F1P350,P87498,E1BY96,        |
| <b>GAIWEGIESGSVEQAVAKFFSAS<br/>CVPGATIEQK</b> | Just<br>chicken | Q4ADG4,Q4ADJ6,P02789,Q4ADJ7, |
| <b>GSPAANVAVK</b>                             | Just<br>chicken | F1NMT4,P27731,               |
| <b>LAHHQVIER</b>                              | Just<br>chicken | E1C544,                      |
| <b>ISIGSKPIR</b>                              | Just<br>chicken | F1NDP3,                      |
| <b>CPDNTVGVDCIERN</b>                         | Just<br>chicken | F1NP23,Q9I9K4,F1NC71,        |

|                                        |                 |                              |
|----------------------------------------|-----------------|------------------------------|
| <b>FTQVTPSLTVNWNAPNVR</b>              | Just<br>chicken | F1NJT3,O57403,F1NJT4,P11722, |
| <b>GDVAFVQHSTVEENTGGK</b>              | Just<br>chicken | E1BQC2,E1BS66,F1NL17,        |
| <b>VTNDAIFYSSNEFEGYPGR</b>             | Just<br>chicken | F1NDP3,                      |
| <b>TKEVVCTSCQTGTTGK</b>                | Just<br>chicken | F1NI05,F1NK49,Q90ZN3,        |
| <b>EIDPQTVMLLASFVFFR</b>               | Just<br>chicken | E1BS56,                      |
| <b>GVDCPYLATYVDR</b>                   | Just<br>chicken | E1BZU7,                      |
| <b>LQELPVQVFQPLGK</b>                  | Just<br>chicken | F1N822,                      |
| <b>DLSACLLGQSLR</b>                    | Just<br>chicken | F1NZA4,Q7T252,Q07212,        |
| <b>IVQLEEQLDMETK</b>                   | Just<br>chicken | F1NCD4,P14105,               |
| <b>HVDKDLGNIEENK</b>                   | Just<br>chicken | P42292,F1NL79,               |
| <b>INKFPLSSFCK</b>                     | Just<br>chicken | P51890,                      |
| <b>FGSYCPTTCGIADFFNK</b>               | Just<br>chicken | F1NSM9,E1BV78,O93568,        |
| <b>LTNLAYLYLGHNALESVPLNLPESL<br/>R</b> | Just<br>chicken | Q9W6H0,                      |
| <b>FSLVGIAGQDLNEGNR</b>                | Just<br>chicken | Q5ZLW0,                      |
| <b>VTHSDSNQLTTEER</b>                  | Just<br>chicken | F1NX21,F1NX20,               |
| <b>EATVVVTVTSR</b>                     | Just<br>chicken | F1NAT6,Q6KDZ1,               |



|                                          |                 |                                         |
|------------------------------------------|-----------------|-----------------------------------------|
| <b>DSVSEPQEFISISGSVK</b>                 | Just<br>chicken | Q197X2,                                 |
| <b>DQYYLQMEDK</b>                        | Just<br>chicken | Q90611,                                 |
| <b>AQYTLTAQAVDR</b>                      | Just<br>chicken | O93319,F1P1Y0,                          |
| <b>VPGNTVDAVL DGLEPETK</b>               | Just<br>chicken | P13944,F1NKN1,F1NM33,F1NX22,            |
| <b>SINIQQNCQINK</b>                      | Just<br>chicken | O42094,F1N8Z0,E1C0V6,                   |
| <b>TFICQVGADSQGVGESR</b>                 | Just<br>chicken | Q98923,Q98922,Q90880,Q90989,Q9892<br>1, |
| <b>ETAYLYAR</b>                          | Just<br>chicken | Q9W6H0,                                 |
| <b>QVDQMDVQLR</b>                        | Just<br>chicken | F1NV02,Q197X2,                          |
| <b>SLEPNTPYTVTVVPVPEGDGGR</b>            | Just<br>chicken | P13944,F1NKN1,F1NM33,F1NX22,            |
| <b>PVQVSEGREPDNFVVALGGK</b>              | Just<br>chicken | F1NKF3,O93510,                          |
| <b>LTPDTAYSINVIALYADGEGNPSQ<br/>AQGR</b> | Just<br>chicken | P13944,F1NKN1,F1NM33,F1NX22,            |
| <b>FQQSYDQCTTEGR</b>                     | Just<br>chicken | Q90611,                                 |
| <b>GVEAAGAMATSLAR</b>                    | Just<br>chicken | F1NA58,                                 |
| <b>MACSEGYLSIVIHDCRK</b>                 | Just<br>chicken | P19121,F2Z4L6,                          |
| <b>QIQQELAEQAK</b>                       | Just<br>chicken | O93601,                                 |
| <b>ATGLNAVPSQILEGQWAAR</b>               | Just<br>chicken | F1NGX1,F1NWS1,                          |

|                                          |                 |                       |
|------------------------------------------|-----------------|-----------------------|
| <b>TFTPFYFLVEPMDILSVR</b>                | Just<br>chicken | F1NW32,Q90610,F1NGZ4, |
| <b>ICTSLPLISESR</b>                      | Just<br>chicken | F1NX60,O73775,        |
| <b>CPEAIFQPSFLGMESCGIHETTFN<br/>SIMK</b> | Just<br>chicken | P53478,G1K2Y7,        |
| <b>TDGHLWCSTTSNFEQDR</b>                 | Just<br>chicken | F1NJT3,               |
| <b>VKNFEEVMQLEFGR</b>                    | Just<br>chicken | F1P2F0,P15989,        |
| <b>ECVSLPDCTSCNPEEK</b>                  | Just<br>chicken | Q98UI9,F1NZY2,        |
| <b>EANNDVATLPQK</b>                      | Just<br>chicken | Q5ZLZ6,               |
| <b>GDPGPVGPVGPAGAFGPR</b>                | Just<br>chicken | P02467,F1P0H9,F1NCR0, |
| <b>LRPIPIAVSVNIAGLESGSSSTR</b>           | Just<br>chicken | P26007,F1P0M0,F1P0B0, |
| <b>TYGGITSYSELKDPQR</b>                  | Just<br>chicken | E1BRP7,Q6B0K7,E1BT59, |
| <b>SSFAEVVDLLPGTTYLFK</b>                | Just<br>chicken | F1NJT3,               |
| <b>VIAHGPDQPSAAAK</b>                    | Just<br>chicken | Q8JHF6,               |
| <b>ESDTFDDSDLFDGDLPR</b>                 | Just<br>chicken | E1BRC1,               |
| <b>VNAQCVDIR</b>                         | Just<br>chicken | P26007,F1P0M0,F1P0B0, |
| <b>FVHDSIGVHK</b>                        | Just<br>chicken | P19121,F2Z4L6,        |
| <b>IISQSPSSAFSMNK</b>                    | Just<br>chicken | F1NJD5,               |

|                                           |                 |                              |
|-------------------------------------------|-----------------|------------------------------|
| <b>SDGLAHIR</b>                           | Just<br>chicken | F1P2F0,P15989,               |
| <b>KAEGTTASPFKPPR</b>                     | Just<br>chicken | P13944,F1NKN1,F1NM33,F1NX22, |
| <b>GIVSQDEMTFVSGAPR</b>                   | Just<br>chicken | P26007,F1POM0,F1POB0,        |
| <b>MNDIQITDVTENSAR</b>                    | Just<br>chicken | F1P2F0,P15989,               |
| <b>NLQPGTEYTVYLVAVK</b>                   | Just<br>chicken | F1NJT3,                      |
| <b>TNCDLLHDHGEADFLK</b>                   | Just<br>chicken | P19121,F2Z4L6,               |
| <b>GVTHNISLLR</b>                         | Just<br>chicken | F1POM2,                      |
| <b>YLIVVTDGHPLEGYKEPCGGLDDA<br/>ANEAK</b> | Just<br>chicken | F1NFE0,P20785,F1NKG1,        |
| <b>DLEVNPTSPTSLEISWDAPAVTVR</b>           | Just<br>chicken | F1NJT3,F1NJT4,P11722,        |
| <b>LANTMIQAK</b>                          | Just<br>chicken | F1NIU3,B3VE14,               |
| <b>VLVKPQESIILIEDK</b>                    | Just<br>chicken | F1NEQ4,                      |
| <b>EESVPLVGQQTTVSDVPR</b>                 | Just<br>chicken | F1NJT3,F1NJT4,P11722,        |
| <b>SLGLVEFLVSTEALQNQQPCR</b>              | Just<br>chicken | E1C544,                      |
| <b>DIQLNMGNTLFIDER</b>                    | Just<br>chicken | E1C7T1,                      |
| <b>VTEAGPSQLR</b>                         | Just<br>chicken | F1NBA6,                      |
| <b>QVGC GSPLSALGSAR</b>                   | Just<br>chicken | Q98TD1,                      |

|                                             |                 |                              |
|---------------------------------------------|-----------------|------------------------------|
| <b>FLQMVQLLR</b>                            | Just<br>chicken | E1BYN5,E1BZD1,               |
| <b>QGVHALLFVGLDR</b>                        | Just<br>chicken | F1P2F0,P15989,               |
| <b>FSPFAFSTGR</b>                           | Just<br>chicken | Q5ZK45,F1NYK3,               |
| <b>ILLPVCGTGFTYDNECGICAHNA<br/>QHGTEVK</b>  | Just<br>chicken | F1NFY4,P10184,F1NMN2,F1NUT1, |
| <b>NQGYQATAYVR</b>                          | Just<br>chicken | F1P350,P87498,E1BY96,        |
| <b>EVPAFLPPNLEQLR</b>                       | Just<br>chicken | E1C7T4,                      |
| <b>YLSAVSSAGTQGGAVAPMTGTV<br/>EK</b>        | Just<br>chicken | Q5ZK45,F1NYK3,               |
| <b>DKFTDLGEEEEDDFGGLQPSGFA<br/>AGSASHSK</b> | Just<br>chicken | F1P4V1,P14448,               |
| <b>RPSVEVAPEGSAGHTYPQFTQR</b>               | Just<br>chicken | F1NJT3,                      |
| <b>LASGTGCEPCDCDTAR</b>                     | Just<br>chicken | F1NJ23,                      |
| <b>MACSEGYLSIVIHDTCR</b>                    | Just<br>chicken | P19121,F2Z4L6,               |
| <b>YGAQLAQIQDMIGSIEAQLAELR</b>              | Just<br>chicken | O93256,F1NDN9,               |
| <b>EIASPPHDLYR</b>                          | Just<br>chicken | P15988,                      |
| <b>ILGADTSAELEETGR</b>                      | Just<br>chicken | F1NI22,Q8UVX3,F1NGA2,        |
| <b>FSMGTLVLGPGPSADQISTISTR</b>              | Just<br>chicken | F1NUF8,                      |
| <b>QTFVTLQEADFAGK</b>                       | Just<br>chicken | F1NV02,F1NRG6,Q197X2,P11682, |

|                                 |                 |                                         |
|---------------------------------|-----------------|-----------------------------------------|
| <b>LGACGDTLQQLMVEVFQFDTISEK</b> | Just<br>chicken | Q91422,                                 |
| <b>NTDDTFVVGIEIIQCGTSK</b>      | Just<br>chicken | Q98UI9,F1NZY2,                          |
| <b>KAADGTWQDFATGK</b>           | Just<br>chicken | F1NMT4,P27731,                          |
| <b>LVQISQR</b>                  | Just<br>chicken | E1C1G2,E1BV96,P84407,                   |
| <b>SGYSFDVISR</b>               | Just<br>chicken | F1NX60,O73775,                          |
| <b>TSHIHTLVDCGPR</b>            | Just<br>chicken | E1C7P4,                                 |
| <b>SSHTGDYQCAVEAGGK</b>         | Just<br>chicken | F1NMM7,E1C340,F1NZJ5,                   |
| <b>TETITGFQIDAIPAASGQNPIQR</b>  | Just<br>chicken | F1NJT3,F1NJT4,P11722,                   |
| <b>NLYGDFFTGDSYLVLTIR</b>       | Just<br>chicken | F1NKF3,O93510,                          |
| <b>ETGNIFATR</b>                | Just<br>chicken | F1NJD7,                                 |
| <b>SIGMAYIYPCPVDVMK</b>         | Just<br>chicken | P02845,Q6BCB8,F1NV01,F1NFL6,E1BYN6<br>, |
| <b>LEPIDLPVR</b>                | Just<br>chicken | F1NJD5,                                 |
| <b>DIDECTQSAGILCTFR</b>         | Just<br>chicken | F1NWN4,                                 |
| <b>GLSPYAQEVQDGLNR</b>          | Just<br>chicken | O93601,                                 |
| <b>VLSTEEIAAQGGEDACSSR</b>      | Just<br>chicken | Q5UMH8,F1NYP7,                          |
| <b>SSELISANR</b>                | Just<br>chicken | F1NLP7,Q91422,F1NLP6,                   |

|                              |                 |                                                   |
|------------------------------|-----------------|---------------------------------------------------|
| <b>GRDPANWIIINSNTAEIQLAK</b> | Just<br>chicken | F1NJD5,                                           |
| <b>LLGDILIIVLA AHFSK</b>     | Just<br>chicken | E1C3W0,F1N9X1,P02112,                             |
| <b>SMDAVEQAAAEMK</b>         | Just<br>chicken | F1P2F0,P15989,                                    |
| <b>KMP PGVPSAIHQ LFLDR</b>   | Just<br>chicken | E1C7T4,                                           |
| <b>LSASSTCGLR</b>            | Just<br>chicken | F1NJ23,O57484,Q01636,                             |
| <b>FSDTSTMYQYVNMIDNK</b>     | Just<br>chicken | F1NUL9,F1P5F9,Q02020,                             |
| <b>GSVVNSDMEHK</b>           | Just<br>chicken | F1NHT5,Q9DE41,E1BQ57,                             |
| <b>CLQELSCQPGYELK</b>        | Just<br>chicken | F1NWN4,                                           |
| <b>LGQLESSWLR</b>            | Just<br>chicken | Q5UMH8,F1NYP7,                                    |
| <b>MGYQYDAFSR</b>            | Just<br>chicken | F1NWN4,                                           |
| <b>NYNLIGFLR</b>             | Just<br>chicken | O73840,F1NJ16,                                    |
| <b>ALLQEEGSWEAAGR</b>        | Just<br>chicken | E1BTB7,                                           |
| <b>IGPSPAYAGDNIILTINK</b>    | Just<br>chicken | F1NWN4,                                           |
| <b>DPVLKDLLFK</b>            | Just<br>chicken | Q4ADG4,E1BQC2,Q4ADJ6,P02789,E1BS66,Q4ADJ7,F1NL17, |
| <b>HSLPGYFIYEVSR</b>         | Just<br>chicken | E1C1G2,E1BV96,P84407,                             |
| <b>DVVFLIDGSDGVR</b>         | Just<br>chicken | F1P2F0,P15989,                                    |

|                               |                 |                                                   |
|-------------------------------|-----------------|---------------------------------------------------|
| <b>LFALSHFMQPLLK</b>          | Just<br>chicken | Q90633,                                           |
| <b>QLVELEETVR</b>             | Just<br>chicken | F1NJ23,                                           |
| <b>KSQNVYELQEAGIGGICHAR</b>   | Just<br>chicken | P02845,Q6BCB8,F1NV01,F1NFL6,E1BYN6<br>,           |
| <b>VLVNTDIGLPNGLTFDPFSK</b>   | Just<br>chicken | F1NDL4,                                           |
| <b>LDDPCCTETVCECDIK</b>       | Just<br>chicken | Q98UI9,F1NZY2,                                    |
| <b>EVFVTDLDAPR</b>            | Just<br>chicken | F1N8F5,P10039,Q90995,F1N8F4,Q90994,F1N8F6,Q90824, |
| <b>IDHTNEVVFLGTSVSGEAETR</b>  | Just<br>chicken | Q197X2,                                           |
| <b>YEELQATAGR</b>             | Just<br>chicken | Q6PVZ4,Q6PVZ3,                                    |
| <b>ALFSQLSSSVSLR</b>          | Just<br>chicken | F1NZZ2,                                           |
| <b>YFPISEIGVLQEDSSNIVELLR</b> | Just<br>chicken | E1C9G7,                                           |
| <b>VALVTYNNEVTTEIR</b>        | Just<br>chicken | F1P2F0,P15989,                                    |
| <b>RADVPDYPVSIAYPHQGER</b>    | Just<br>chicken | E1BTB7,                                           |
| <b>GQQAELFDFSR</b>            | Just<br>chicken | F1N8P9,F1NM47,                                    |
| <b>LSFNEFLK</b>               | Just<br>chicken | F1NM70,Q9W600,F1NP21<br>,                         |
| <b>NSVSAINYIGK</b>            | Just<br>chicken | F1NFE0,P20785,F1NBG1,                             |
| <b>LNMNIDNEELK</b>            | Just<br>chicken | Q5F381,F1NV09,                                    |

|                             |                 |                                                   |
|-----------------------------|-----------------|---------------------------------------------------|
| <b>IGSHEIDMHPVNGQVK</b>     | Just<br>chicken | P02845,F1NFL6,E1BYN6,                             |
| <b>QAELALGNAAADAR</b>       | Just<br>chicken | F1NK49,                                           |
| <b>KVLVFSDBGNSQGITAR</b>    | Just<br>chicken | F1NFE0,P20785,F1NBG1,                             |
| <b>YMYAVLEDGCTK</b>         | Just<br>chicken | P12105,F1NI73,F1NI72,                             |
| <b>SINNQIENILSPDGSR</b>     | Just<br>chicken | P12105,F1NI73,F1NI72,                             |
| <b>SKFMMFESQNK</b>          | Just<br>chicken | Q4ADG4,E1BQC2,Q4ADJ6,P02789,E1BS66,Q4ADJ7,F1NL17, |
| <b>SHLEDVVVALLK</b>         | Just<br>chicken | E1C344,Q6QAZ9,F1N9S7,Q92108,                      |
| <b>VHETAVMALK</b>           | Just<br>chicken | F1P350,P87498,E1BY96,                             |
| <b>EVVGSAEAGVDAASVSEEFR</b> | Just<br>chicken | P01012,                                           |
| <b>GQVGAPMPGEVVEVR</b>      | Just<br>chicken | Q8JHF6,                                           |
| <b>KMPQVPTDLLLETGKK</b>     | Just<br>chicken | P19121,F2Z4L6,                                    |
| <b>VTYDFTTPK</b>            | Just<br>chicken | F1NV02,Q197X2,                                    |
| <b>QITILIVR</b>             | Just<br>chicken | F1NQ51,                                           |
| <b>VLVYLGYSLVNK</b>         | Just<br>chicken | E1BYN5,E1BZD1,                                    |
| <b>VISGEQSTEGSLPLR</b>      | Just<br>chicken | F1N9I4,                                           |
| <b>EALSLQASDR</b>           | Just<br>chicken | E1BXK1,                                           |



|                                                  |                 |                              |
|--------------------------------------------------|-----------------|------------------------------|
| <b>EINLSPDSTSAVVSGMLVATKYEV<br/>SVYALKDSLTSR</b> | Just<br>chicken | F1NJT3,F1NJT4,P11722,        |
| <b>VESLSDVEVILQQSAGDIAR</b>                      | Just<br>chicken | F1NJ23,                      |
| <b>AIGNMGAVMEK</b>                               | Just<br>chicken | F1NV02,Q197X2,               |
| <b>LRVPHVTMADSGEYVCR</b>                         | Just<br>chicken | Q6KDZ1,                      |
| <b>YDDQLATR</b>                                  | Just<br>chicken | F1NGX1,F1NWS1,P26008,        |
| <b>DVLVNTIGIGDIFDQPEQSETLVS<br/>ACNEPQR</b>      | Just<br>chicken | P15988,                      |
| <b>YTGEELYLMATEK</b>                             | Just<br>chicken | F1NV02,F1NRG6,               |
| <b>EMVGGYHGAEPSVSLTAFVLSAL<br/>QESQK</b>         | Just<br>chicken | Q2MV09,Q90633,A6N9E0<br>,    |
| <b>ILSSTGVQIR</b>                                | Just<br>chicken | F1NZY2,                      |
| <b>RLECMNPNQLGR</b>                              | Just<br>chicken | F1NP23,Q9I9K4,F1NC71,        |
| <b>IAALATTGQMAR</b>                              | Just<br>chicken | P87498,                      |
| <b>VMEQLSNLR</b>                                 | Just<br>chicken | F1N8F3,P08250,               |
| <b>IIEEAPGPGINPEVR</b>                           | Just<br>chicken | Q5ZK45,F1NYK3,               |
| <b>IAEGVPQFLILLTADR</b>                          | Just<br>chicken | F1P2F0,P15989,               |
| <b>LVIVTAGAR</b>                                 | Just<br>chicken | P00340,F1NW35,E1BTT8,        |
| <b>HFAVQGVSLSEGSFPSYVAYR</b>                     | Just<br>chicken | P13944,F1NKN1,F1NM33,F1NX22, |

|                                             |                 |                              |
|---------------------------------------------|-----------------|------------------------------|
| <b>AFNPVCGTDGVTYDNECLLCAHK</b>              | Just<br>chicken | B6V1G0,P01005,               |
| <b>EVAVNTEQLQSGK</b>                        | Just<br>chicken | Q6PVZ1,F1NPR7,F1NDP0,        |
| <b>VGVDSEAGEAEDTNMATYIHEE<br/>FR</b>        | Just<br>chicken | F1NTM6,F1NWR2,Q90997<br>,    |
| <b>NAELSFVFITDGITGSK</b>                    | Just<br>chicken | P15988,                      |
| <b>EHGANVEKEYDGECRPK</b>                    | Just<br>chicken | F1NFY4,P10184,F1NMN2,F1NUT1, |
| <b>ISGNLDAPEGGFDAILQTAVCK</b>               | Just<br>chicken | E1C9G7,                      |
| <b>SCSTAGVCINWR</b>                         | Just<br>chicken | Q98UI9,F1NZY2,               |
| <b>YVYLYEAETSSGITGTADSHSGSK</b>             | Just<br>chicken | F1NV02,                      |
| <b>EGDQSLVTMSLPVTANLIPSFR</b>               | Just<br>chicken | Q90633,                      |
| <b>LAPLAQQLDER</b>                          | Just<br>chicken | O93601,                      |
| <b>QLLGDVTTIPDVS GEEKDVVFLID<br/>SSDSVR</b> | Just<br>chicken | F1P2F0,P15989,               |
| <b>TFGEGEADCGTRPLFEK</b>                    | Just<br>chicken | F1NXV6,Q91001,               |
| <b>KPAQGFSQAQLER</b>                        | Just<br>chicken | F1NG70,                      |
| <b>RSDLLDAIKR</b>                           | Just<br>chicken | P13944,F1NKN1,F1NM33,F1NX22, |
| <b>TIQFQPTVVER</b>                          | Just<br>chicken | F1P2F0,P15989,               |
| <b>VELMYNPALCSASTTK</b>                     | Just<br>chicken | Q90633,                      |

|                                            |                 |                              |
|--------------------------------------------|-----------------|------------------------------|
| <b>SAGVAVPGPMGPAGPR</b>                    | Just<br>chicken | P02457,                      |
| <b>QSFDLNLNAQYEK</b>                       | Just<br>chicken | F1NV02,Q197X2,Q7LZ77,F1NRG7, |
| <b>SSDDGQGASMEVAQK</b>                     | Just<br>chicken | F1P2F0,P15989,               |
| <b>AVTCPAPTGIENGFLNFAVR</b>                | Just<br>chicken | F1NYG4,E1BSE0,               |
| <b>YHTDVQQTANNR</b>                        | Just<br>chicken | F1NP23,                      |
| <b>AIGYLVSGYQR</b>                         | Just<br>chicken | E1C544,                      |
| <b>NMENILLSPVVVASSLGLVSLGGK</b>            | Just<br>chicken | P13731,                      |
| <b>TAVQTVLAGMEVELECLGLGEPQ<br/>PHVTWSK</b> | Just<br>chicken | F1NAT6,Q6KDZ1,               |
| <b>LMSSVETEIK</b>                          | Just<br>chicken | F1NI73,F1NI72,               |
| <b>TTWIIIEMR</b>                           | Just<br>chicken | Q5F381,F1NV09,               |
| <b>DFLVNLIESLR</b>                         | Just<br>chicken | F1P2F0,P15989,               |
| <b>MYQVGEQWQK</b>                          | Just<br>chicken | F1NJT3,                      |
| <b>GDSPASSKPVTVTYK</b>                     | Just<br>chicken | F1NJT3,F1NJT4,P11722,        |
| <b>GLNIPLSTLLSSTQSCHYSIDAK</b>             | Just<br>chicken | F1NV02,Q197X2,               |
| <b>VVIHFTDGTDDYLDQMK</b>                   | Just<br>chicken | F1P2F0,P15989,               |
| <b>TTEFGEIHELTTTEQFVEGVYR</b>              | Just<br>chicken | F1NMT4,P27731,               |

|                                           |                 |                       |
|-------------------------------------------|-----------------|-----------------------|
| <b>VNVDILR</b>                            | Just<br>chicken | F1NJD7,               |
| <b>ELAAVSVDCEYKPKDCTAEDRPL<br/>CGSDNK</b> | Just<br>chicken | B6V1G0,P01005,        |
| <b>GCPAALPLANIYETLGVVGSATTQ<br/>LYSDR</b> | Just<br>chicken | O42390,F1P494,        |
| <b>MEYECDPFTLVGSK</b>                     | Just<br>chicken | E1C7P4,               |
| <b>VSFLGHFIYSVAR</b>                      | Just<br>chicken | P19121,F2Z4L6,        |
| <b>NSMHVAMADEAYCIGPAPSQQS<br/>YLAVEK</b>  | Just<br>chicken | Q5ZK45,F1NYK3,        |
| <b>TAAFLLPILSQIYADGPGDALR</b>             | Just<br>chicken | F1NIX1,Q5F491,F1NIX2, |
| <b>TNILSPTSIQVLWTAIR</b>                  | Just<br>chicken | F1NBA6,               |
| <b>LLGHWVYIMGASQYPPHMAEM<br/>R</b>        | Just<br>chicken | E1BZ67,Q8JIG5,A7UEB0, |
| <b>TFSDVTGLAR</b>                         | Just<br>chicken | F1NK49,               |
| <b>IYQEDLEHGPK</b>                        | Just<br>chicken | F1NTK2,               |
| <b>GFIPSGESSYGLLAENYK</b>                 | Just<br>chicken | F1N9I4,               |
| <b>QYVNTVQETR</b>                         | Just<br>chicken | P26007,F1P0M0,F1P0B0, |
| <b>TKTETITGFQIDAIPAASGQNPIQ<br/>R</b>     | Just<br>chicken | F1NJT3,F1NJT4,P11722, |
| <b>TDEVSPKDLQFVEVSDVK</b>                 | Just<br>chicken | F1NJT3,               |
| <b>CREEVPELDCSK</b>                       | Just<br>chicken | F1NFY4,P10184,F1NMN2, |

|                              |                 |                                                   |
|------------------------------|-----------------|---------------------------------------------------|
| <b>NFLSMVSTCCISPSPTVCFLK</b> | Just<br>chicken | Q9W6F5,F1NVF3,                                    |
| <b>GTADYAVFK</b>             | Just<br>chicken | F1NSM9,E1BV78,O93568,                             |
| <b>EGIIVALVDGR</b>           | Just<br>chicken | F1NDP3,                                           |
| <b>LTNEAAQVR</b>             | Just<br>chicken | P26007,F1POM0,F1POB0,                             |
| <b>FQDVLDHAYIVGSDGR</b>      | Just<br>chicken | F1NDL4,                                           |
| <b>MFGQELLFGR</b>            | Just<br>chicken | F1P350,P87498,E1BY96,                             |
| <b>ELIDSTTFTNLK</b>          | Just<br>chicken | F1NV02,Q197X2,                                    |
| <b>YAAQEFYLIR</b>            | Just<br>chicken | F1P2F0,P15989,                                    |
| <b>RGGSLPAGHQVSGSR</b>       | Just<br>chicken | Q6KDZ1,                                           |
| <b>LLVQEMALR</b>             | Just<br>chicken | F1NIV0,                                           |
| <b>YPASVARPQCGGGLLGVR</b>    | Just<br>chicken | Q90953,E1BZM6,                                    |
| <b>SDHPIIDVNGIIVFGTR</b>     | Just<br>chicken | F1NR02,E1BTC9,Q9IAU4,F1NR03,F1NR01,Q90589,F1NI79, |
| <b>IALLQYGSER</b>            | Just<br>chicken | P15988,                                           |
| <b>IVTSPYTIHFTHTPK</b>       | Just<br>chicken | Q90633,                                           |
| <b>NSDDFANAMSK</b>           | Just<br>chicken | F1NV02,Q197X2,                                    |
| <b>LLLLLEELSLAENR</b>        | Just<br>chicken | Q9W6H0,                                           |

|                                       |                 |                                         |
|---------------------------------------|-----------------|-----------------------------------------|
| <b>QEHTCGILKK</b>                     | Just<br>chicken | E1C1G2,E1BV96,P84407,                   |
| <b>SHVEEALKGNEVPTAK</b>               | Just<br>chicken | F1NV02,Q197X2,                          |
| <b>GAVYIYHGHGNTISK</b>                | Just<br>chicken | O42094,F1N8Z0,E1C0V6,                   |
| <b>GEGQIQSLSLR</b>                    | Just<br>chicken | F1NV02,Q197X2,                          |
| <b>DAQEEEKTEALK</b>                   | Just<br>chicken | F1NKF3,O93510,                          |
| <b>KMPQVPTDLLLETGK</b>                | Just<br>chicken | P19121,F2Z4L6,                          |
| <b>AQMASSPNLTPTVNK</b>                | Just<br>chicken | F1NLU4,                                 |
| <b>VQAERPDTMLGVVCGALHVADV<br/>SFR</b> | Just<br>chicken | F1NNT2,F1P5V8,F1NWT0,P11029,Q9890<br>9, |
| <b>AQDCPVDLFFVLDTSESVALR</b>          | Just<br>chicken | F1NFE0,P20785,F1NBG1,                   |
| <b>GEFGEVFLAK</b>                     | Just<br>chicken | F1NLV8,Q91048,                          |
| <b>LISDVWGIIEGPIDAAFTR</b>            | Just<br>chicken | O12945,E1C7A7,F1NER8,                   |
| <b>MTPLVQEFR</b>                      | Just<br>chicken | F1N8F3,P08250,                          |
| <b>RIAVSDFADITTLR</b>                 | Just<br>chicken | Q9W6H0,                                 |
| <b>YAAQSDFYWLR</b>                    | Just<br>chicken | E1BR88,E1BXR4,                          |
| <b>EDGLRQEHTCGILKK</b>                | Just<br>chicken | E1C1G2,E1BV96,P84407,                   |
| <b>GNVGLAGPR</b>                      | Just<br>chicken | P02467,F1POH9,F1NCR0,                   |

|                              |                 |                                    |
|------------------------------|-----------------|------------------------------------|
| <b>NVPLYNAIGEHALR</b>        | Just<br>chicken | F1P350,P87498,E1BY96,              |
| <b>CIGNMGEPASLK</b>          | Just<br>chicken | P02845,Q6BCB8,F1NV01,F1NFL6,E1BYN6 |
| <b>LCLAALEHPPR</b>           | Just<br>chicken | ,<br>Q9W6F5,F1NVF3,                |
| <b>GAPSSLTTEELQVVSSLVR</b>   | Just<br>chicken | E1C8R2,                            |
| <b>FIADLADFFLHK</b>          | Just<br>chicken | F1NZZ2,                            |
| <b>NPTIDGEESTCYSVDPVLK</b>   | Just<br>chicken | F1P350,P87498,E1BY96,              |
| <b>VPFSTLQVPAYTIDLR</b>      | Just<br>chicken | F1NV02,Q197X2,                     |
| <b>ILGQEVAFININKELLQQVMK</b> | Just<br>chicken | P02845,Q6BCB8,F1NV01,F1NFL6,E1BYN6 |
| <b>NCESVPVCIPLNLER</b>       | Just<br>chicken | ,<br>E1C6L4,                       |
| <b>ELLLLDNVR</b>             | Just<br>chicken | Q98TT7,                            |
| <b>SPYQQVLQHSR</b>           | Just<br>chicken | O42390,                            |
| <b>FTSNNNVAIVITDGR</b>       | Just<br>chicken | F1NFE0,P20785,F1NBG1,              |
| <b>DPQILTGTEVFGR</b>         | Just<br>chicken | F1NSA4,P26009,                     |
| <b>ADEAYLVGR</b>             | Just<br>chicken | Q8JHF6,                            |
| <b>LGTFSLDASNP</b>           | Just<br>chicken | F1NZZ2,                            |
| <b>KVNFQEGAQANR</b>          | Just<br>chicken | Q5ZK45,F1NYK3,                     |

|                                                  |                 |                                         |
|--------------------------------------------------|-----------------|-----------------------------------------|
| <b>EILAVEASTSR</b>                               | Just<br>chicken | F1NV02,Q197X2,                          |
| <b>FSCECSIGFR</b>                                | Just<br>chicken | F1NP23,                                 |
| <b>NIQVYNPTPNSMNVR</b>                           | Just<br>chicken | P13944,F1NKN1,F1NM33,F1NX22,            |
| <b>RNAELSFVITDGITGSK</b>                         | Just<br>chicken | P15988,                                 |
| <b>YAGIEEAMLR</b>                                | Just<br>chicken | F1NV02,Q197X2,                          |
| <b>WADAGAEYVVESTGVFTTMEK</b>                     | Just<br>chicken | F1NH87,P00356,F1NK14,                   |
| <b>GGSVLNTGSALNFVLSNHFTEAG<br/>GSR</b>           | Just<br>chicken | F1P2F0,P15989,                          |
| <b>KVQISLVQYSR</b>                               | Just<br>chicken | P13944,F1NKN1,F1NM33,F1NX22,            |
| <b>YSPVKKEEDVAELTISPSDNVVVL<br/>TNLLPGTEYLVR</b> | Just<br>chicken | F1NJT3,F1NJT4,P11722,                   |
| <b>FLPISSSSAADIPVHIQIDAITALK</b>                 | Just<br>chicken | P02845,Q6BCB8,F1NV01,F1NFL6,E1BYN6<br>, |
| <b>GCDKYGCGYFGAPR</b>                            | Just<br>chicken | P08940,F1NEF7,F1NXC3,                   |
| <b>RHPEFSAQMLLR</b>                              | Just<br>chicken | E1C1G2,E1BV96,P84407,                   |
| <b>VCRDEIETVQELGDR</b>                           | Just<br>chicken | F1NS08,Q92071,                          |
| <b>VSVPTHSEETGDASLTFSR</b>                       | Just<br>chicken | Q90953,E1BZM6,                          |
| <b>MVVCDLGNPMK</b>                               | Just<br>chicken | F1NGX1,F1NWS1,P26008,                   |
| <b>TEVWWTIDGK</b>                                | Just<br>chicken | E1C117,                                 |



|                                       |                 |                           |
|---------------------------------------|-----------------|---------------------------|
| <b>YQLSQDGVVLFK</b>                   | Just<br>chicken | P09102,F1N9H3,            |
| <b>GFNCESKPEPEETCFDKYTGSTYR</b>       | Just<br>chicken | F1NJT3,                   |
| <b>TESGSFHITR</b>                     | Just<br>chicken | E1C9G7,                   |
| <b>LLLVRPEGVLEIK</b>                  | Just<br>chicken | F1NIV0,                   |
| <b>FDGDFCQYDVLQCPR</b>                | Just<br>chicken | E1C9G7,                   |
| <b>LLPESPSEPFQITDR</b>                | Just<br>chicken | P13944,                   |
| <b>TDTVANVQGAASHR</b>                 | Just<br>chicken | F1NV02,Q197X2,            |
| <b>QGTLIQVPSSAGDVGCYK</b>             | Just<br>chicken | F1NYG0,                   |
| <b>TIYWTDVAGR</b>                     | Just<br>chicken | F1NDL4,                   |
| <b>LSENNIQTIFAVTEEFQAVYK</b>          | Just<br>chicken | F1N8N7,P07228,            |
| <b>DNMEQSCCSFECHPPR</b>               | Just<br>chicken | F1NFE0,P20785,F1NBG1,     |
| <b>GQTCVPLGSPSLLAVR</b>               | Just<br>chicken | Q6KDZ1,                   |
| <b>FLSSISSVLTEK</b>                   | Just<br>chicken | P02007,                   |
| <b>LSHPEWSSGFYWIDPNQGCTAD<br/>AIR</b> | Just<br>chicken | P02467,F1P0H9,F1NCRO,     |
| <b>NPAAVSESLYNR</b>                   | Just<br>chicken | F1NTM6,F1NWR2,Q90997<br>, |
| <b>VPGTQTALELGLDR</b>                 | Just<br>chicken | F1NBA6,                   |

|                                              |                 |                              |
|----------------------------------------------|-----------------|------------------------------|
| <b>TATGAVEDSAAAFGNSWK</b>                    | Just<br>chicken | Q98UI9,F1NZY2,               |
| <b>YSPEEIAMATVTALR</b>                       | Just<br>chicken | P53449,                      |
| <b>FVHDSIGVHKECCEGDMVECMD<br/>DMAR</b>       | Just<br>chicken | P19121,F2Z4L6,               |
| <b>GIISVLGTGLDR</b>                          | Just<br>chicken | E1C6M9,F1NUS5,P08641,        |
| <b>GFQLSDIDGISCEDIDECALPTGG<br/>HICSFR</b>   | Just<br>chicken | F1NX60,O73775,               |
| <b>VSGSLVVGR</b>                             | Just<br>chicken | F1NDL4,                      |
| <b>EEAESTLQSFR</b>                           | Just<br>chicken | F1NXT0,F1NFH3,P09654,F1NJ08, |
| <b>VLDSGAPIR</b>                             | Just<br>chicken | Q5ZLC5,                      |
| <b>APENTMQAMQQK</b>                          | Just<br>chicken | P05094,                      |
| <b>IITVQVDESNPSELR</b>                       | Just<br>chicken | F1N8P9,F1NM47,               |
| <b>VELEVPQLCQFILR</b>                        | Just<br>chicken | F1NV02,Q197X2,               |
| <b>IQFNYPQESVSDVTQSSFHNYFG<br/>GSEIVVAGK</b> | Just<br>chicken | F1NIU3,B3VE14,               |
| <b>NLCNIPCSALLSSDITASVNCAK</b>               | Just<br>chicken | B8YJP1,P00698,B8YJT7,B8YJN9, |
| <b>GEAFSLVATVFNYLR</b>                       | Just<br>chicken | F1NK40,                      |
| <b>ILELPFASGDLSMLVLLPDEVSDLE<br/>R</b>       | Just<br>chicken | P01013,                      |
| <b>SSCEDCVCTDEQDAVTGTNR</b>                  | Just<br>chicken | Q98UI9,F1NZY2,               |

|                                         |                 |                                                   |
|-----------------------------------------|-----------------|---------------------------------------------------|
| <b>SYTVTTTSSTR</b>                      | Just<br>chicken | O93532,                                           |
| <b>APPTNTCPHEITR</b>                    | Just<br>chicken | E1BST4,                                           |
| <b>GDAALEPGDDAR</b>                     | Just<br>chicken | F1NP23,                                           |
| <b>PALALITTIANVAMK</b>                  | Just<br>chicken | P02845,Q6BCB8,F1NV01,F1NFL6,E1BYN6<br>,           |
| <b>PASDVICQEYQDNRVSFLGHFIYS<br/>VAR</b> | Just<br>chicken | P19121,F2Z4L6,                                    |
| <b>AQLSPLAQELQEALR</b>                  | Just<br>chicken | O93601,                                           |
| <b>KEQVEISKEELDQEDPYLHDGCR</b>          | Just<br>chicken | F1NX60,O73775,                                    |
| <b>GLNSLLYLDLSFNQLTK</b>                | Just<br>chicken | P51890,                                           |
| <b>PCFTAMGVDTK</b>                      | Just<br>chicken | P19121,F2Z4L6,                                    |
| <b>LDAPSQIEAK</b>                       | Just<br>chicken | F1N8F5,P10039,Q90995,F1N8F4,Q90994,F1N8F6,Q90824, |
| <b>ESNGLYTVVSTLFSK</b>                  | Just<br>chicken | F1NXW9,Q98923,E1C6L8,Q98922,Q90880,Q90989,Q98921, |
| <b>HVNAFSCLR</b>                        | Just<br>chicken | Q9W6H0,                                           |
| <b>IHSIEAAEYNGIWPTSSFSR</b>             | Just<br>chicken | F1P350,P87498,E1BY96,                             |
| <b>ETVQNLVLCLK</b>                      | Just<br>chicken | E1C544,                                           |
| <b>LPDMILYQK</b>                        | Just<br>chicken | F1NV01,F1NFL6,E1BYN6,                             |
| <b>DDDKNLGALCGR</b>                     | Just<br>chicken | P15988,                                           |

|                                      |                 |                                                                                                                                                                                                                                     |
|--------------------------------------|-----------------|-------------------------------------------------------------------------------------------------------------------------------------------------------------------------------------------------------------------------------------|
| <b>DLQFVEVSDVK</b>                   | Just<br>chicken | F1NJT3,                                                                                                                                                                                                                             |
| <b>MSSAFQVDFSDYSK</b>                | Just<br>chicken | F1NV02,Q197X2,                                                                                                                                                                                                                      |
| <b>VSTELVTGR</b>                     | Just<br>chicken | P02845,Q6BCB8,F1NV01,F1NFL6,E1BYN6<br>,                                                                                                                                                                                             |
| <b>ALGNVGHPASIK</b>                  | Just<br>chicken | F1P350,P87498,E1BY96,                                                                                                                                                                                                               |
| <b>QSDINTCFGEEGANLIVQSR</b>          | Just<br>chicken | P19121,F2Z4L6,                                                                                                                                                                                                                      |
| <b>QLGCGDAVLAPIAAK</b>               | Just<br>chicken | Q98TD1,                                                                                                                                                                                                                             |
| <b>TTLNLYGFGPSDIFELGLDGK</b>         | Just<br>chicken | F1NV02,Q197X2,                                                                                                                                                                                                                      |
| <b>VGVVQYSHEGTFEAIK</b>              | Just<br>chicken | P15988,                                                                                                                                                                                                                             |
| <b>HSVTGMDLEPPLELR</b>               | Just<br>chicken | F1NHU4,F1NTQ4,                                                                                                                                                                                                                      |
| <b>ELINSWVESQTNGIIR</b>              | Just<br>chicken | P01012,                                                                                                                                                                                                                             |
| <b>HTTVNENAPDQKDEYELLCLDGS<br/>R</b> | Just<br>chicken | Q4ADG4,E1BQC2,Q4ADJ6,P02789,E1BS66,Q4ADJ7,F1NL17,                                                                                                                                                                                   |
| <b>MMISTAVIEDAELSLAASNVLV<br/>R</b>  | Just<br>chicken | O42273,                                                                                                                                                                                                                             |
| <b>AILYNYWTNK</b>                    | Just<br>chicken | Q90633,                                                                                                                                                                                                                             |
| <b>MPQVPTDLLLETGK</b>                | Just<br>chicken | P19121,F2Z4L6,                                                                                                                                                                                                                      |
| <b>VSALQSGSLPETDR</b>                | Just<br>chicken | F1C6T9,B6RCN7,Q9TP88,B6RCP0,Q31553,F1C6X0,E2JF31,F1C6U<br>0,B6RCP6,B6RCP2,B5BSL0,B6RCP1,F1C6V3,Q9TP81,Q4U600,B5B<br>S98,B5BSJ8,F1C6W5,B5BSM3,B5BSM5,F1C6T7,B6RCN9,F1C6T8,<br>Q9TP87,Q9TP78,B5BSJ6,F1C6V0,Q4U337,Q4U5Z9,E2JF30,Q9TP7 |

|                                 |              |                                                                                                                                                                                                                                                                                                                                                                                                                                                                                                              |
|---------------------------------|--------------|--------------------------------------------------------------------------------------------------------------------------------------------------------------------------------------------------------------------------------------------------------------------------------------------------------------------------------------------------------------------------------------------------------------------------------------------------------------------------------------------------------------|
|                                 |              | 7,A5HUL4,F1C6U7,F1C6T6,F1C6W8,E2JF32,Q9TP79,B5BSA0,B6RCP5,Q31410,Q31414,F1C6V2,F1C6W2,Q9TP75,F1C6U8,Q860T3,F1C6W9,F1C6W7,B6C862,Q5MBI5,Q9TP83,B6RCN5,F1C6U2,F1C6U5,F1C6U4,Q860T5,E2JF33,Q9TP80,B6RCP4,B5BSB2,F1C6V8,Q31413,F1C6W4,B6RCN6,F1C6W1,F1C6V7,F1C6U6,B5BSB4,E5LFW9,F1C6V9,B5BSF4,F1C6V1,Q4U5Z8,B5BSR6,B5BSE2,F1C6U3,B6C863,Q5MBI3,Q9TP74,F1C6W3,B6RCP3,F1C6V6,Q9TP82,F1C6V5,Q6R674,A5HUL2,F1C6W0,Q9TP85,F1C6W6,B5BSI2,F1C6U1,Q9TP84,B5BSF6,F1C6V4,Q9TP86,F1C6X1,F1C6U9,Q31398,F1NJT3,F1NJT4,P11722, |
| <b>KEEDVAELTISPSDNVVLTNLLP</b>  | Just chicken |                                                                                                                                                                                                                                                                                                                                                                                                                                                                                                              |
| <b>GTEYLVR</b>                  |              |                                                                                                                                                                                                                                                                                                                                                                                                                                                                                                              |
| <b>VSPADALALMNR</b>             | Just chicken | F1P4I7,E1BUA6,Q5ZHM4,                                                                                                                                                                                                                                                                                                                                                                                                                                                                                        |
| <b>RHPFLYAPAILSFAVDFEHALQSC</b> | Just chicken | P19121,F2Z4L6,                                                                                                                                                                                                                                                                                                                                                                                                                                                                                               |
| <b>CK</b>                       |              |                                                                                                                                                                                                                                                                                                                                                                                                                                                                                                              |
| <b>FVLYLGSR</b>                 | Just chicken | F1NZZ2,                                                                                                                                                                                                                                                                                                                                                                                                                                                                                                      |
| <b>ISLGGSSYSVR</b>              | Just chicken | O93532,                                                                                                                                                                                                                                                                                                                                                                                                                                                                                                      |
| <b>KANLVDVTK</b>                | Just chicken | F1P350,P87498,E1BY96,                                                                                                                                                                                                                                                                                                                                                                                                                                                                                        |
| <b>FIPACLDELTEFPLR</b>          | Just chicken | P36377,F1P291,                                                                                                                                                                                                                                                                                                                                                                                                                                                                                               |
| <b>DKNMENILLSPVVVASSLGLVSLG</b> | Just chicken | P13731,                                                                                                                                                                                                                                                                                                                                                                                                                                                                                                      |
| <b>GK</b>                       |              |                                                                                                                                                                                                                                                                                                                                                                                                                                                                                                              |
| <b>TWLWDLYSVGPSGK</b>           | Just chicken | F1NIV0,F1NTK2,                                                                                                                                                                                                                                                                                                                                                                                                                                                                                               |
| <b>SVAVYSEADR</b>               | Just chicken | Q5ZK45,F1NYK3,                                                                                                                                                                                                                                                                                                                                                                                                                                                                                               |
| <b>VYCNMETGETCLSANPATVPR</b>    | Just chicken | P12105,F1NI73,F1NI72,                                                                                                                                                                                                                                                                                                                                                                                                                                                                                        |

|                                           |                 |                                                   |
|-------------------------------------------|-----------------|---------------------------------------------------|
| <b>NFQNVEYLLIHGTADDNVHFQNS<br/>AQIAK</b>  | Just<br>chicken | F1NDP3,                                           |
| <b>VPASETILR</b>                          | Just<br>chicken | F1NV02,F1NRG6,Q197X2,P11682,                      |
| <b>IQMQSGTAYSHR</b>                       | Just<br>chicken | Q197X2,                                           |
| <b>ATAGAVSCHEQEPSGK</b>                   | Just<br>chicken | F1NAR5,                                           |
| <b>AGQFLLDVSQTTVVSGIR</b>                 | Just<br>chicken | P02659,                                           |
| <b>VLHFDSITGAGSTTDSQCGSSEYV<br/>HNLFK</b> | Just<br>chicken | P01014,F1NJA4,                                    |
| <b>LVAIINWLK</b>                          | Just<br>chicken | F1NV02,Q197X2,                                    |
| <b>GEQLLLIQSIQK</b>                       | Just<br>chicken | F1NZZ2,                                           |
| <b>ILDEEVFEGDIQQLLIVADPR</b>              | Just<br>chicken | F1NR02,E1BTC9,Q9IAU4,F1NR03,F1NR01,Q90589,F1NI79, |
| <b>RHPFLYAPTILSVAIHYDEMMK</b>             | Just<br>chicken | E1C1G2,E1BV96,P84407,                             |
| <b>VVDVDKLCCLDVSK</b>                     | Just<br>chicken | E1BXM5,O42273,E1C1X2,                             |
| <b>EFLGDKFYTVISSLK</b>                    | Just<br>chicken | E1BQC2,P02789,E1BS66,F1NL17,                      |
| <b>IVEVFDIGPDKVQIGLAQYSGDPR</b>           | Just<br>chicken | P13944,F1NKN1,F1NM33,F1NX22,                      |
| <b>RMEEALDNYVIR</b>                       | Just<br>chicken | E1BR16,F1POM2,                                    |
| <b>ECCEGDMVECMDDMAR</b>                   | Just<br>chicken | P19121,F2Z4L6,                                    |
| <b>WYDVAVGTTCK</b>                        | Just<br>chicken | F1NUF8,                                           |

|                                       |                 |                       |
|---------------------------------------|-----------------|-----------------------|
| <b>VNFQEGAQANR</b>                    | Just<br>chicken | Q5ZK45,F1NYK3,        |
| <b>IWSVLDSPR</b>                      | Just<br>chicken | F1NK22,               |
| <b>VLSAADKNNVK</b>                    | Just<br>chicken | P01994,               |
| <b>VSLLSEFEGGFNFR</b>                 | Just<br>chicken | F1NSZ5,               |
| <b>HVTIDCSPYLQVVR</b>                 | Just<br>chicken | F1NFY4,F1NMN2,        |
| <b>WKCDPVDQCQDSETR</b>                | Just<br>chicken | F1NJT3,               |
| <b>TPSWTGIGFVR</b>                    | Just<br>chicken | F1NJ23,               |
| <b>QEGIIFIGPPSSAIR</b>                | Just<br>chicken | Q5ZK45,F1NYK3,        |
| <b>CLQELSCQPGYELKDGECDIDEC<br/>ER</b> | Just<br>chicken | F1NWN4,               |
| <b>DTAEIQETTGR</b>                    | Just<br>chicken | F1NSM9,E1BV78,O93568, |
| <b>GQEGTDVSISSDDAPK</b>               | Just<br>chicken | F1NX60,O73775,        |
| <b>DGECVDIDECER</b>                   | Just<br>chicken | F1NWN4,               |
| <b>CDPVDQCQDSETR</b>                  | Just<br>chicken | F1NJT3,               |
| <b>AVFFAGNEYWVYTASNLDR</b>            | Just<br>chicken | Q90611,               |
| <b>TLDDLQLSHNK</b>                    | Just<br>chicken | P51890,               |
| <b>NAGLHLVEAQR</b>                    | Just<br>chicken | F1NG70,               |

|                           |                 |                                         |
|---------------------------|-----------------|-----------------------------------------|
| <b>GGFPEAAFDPSAVIVTWK</b> | Just<br>chicken | F1NP23,                                 |
| <b>FGQVQVNR</b>           | Just<br>chicken | F1NG70,                                 |
| <b>IENNNALVAR</b>         | Just<br>chicken | Q6PPA9,Q90633,                          |
| <b>LGQFTNLR</b>           | Just<br>chicken | F1NLU4,                                 |
| <b>YPSDFTPEVHAAWDK</b>    | Just<br>chicken | P02007,                                 |
| <b>TGFEGQLCDR</b>         | Just<br>chicken | F1NZZ2,                                 |
| <b>LWAYLTVNQMLAER</b>     | Just<br>chicken | F1NIU3,B3VE14,                          |
| <b>EAQETAFQLQQDK</b>      | Just<br>chicken | Q5UMH8,F1NYP7,                          |
| <b>FPAVLPQMPLQLIK</b>     | Just<br>chicken | P02845,Q6BCB8,F1NV01,F1NFL6,E1BYN6<br>, |
| <b>IDVPFDWEYINQMPQK</b>   | Just<br>chicken | F1NRG6,Q197X2,P11682,                   |
| <b>FLPTFSLAAAALPSR</b>    | Just<br>chicken | E1BYN5,E1BZD1,                          |
| <b>GDMLECMR</b>           | Just<br>chicken | E1C1G2,E1BV96,P84407,                   |
| <b>LLSHCILCSVAAR</b>      | Just<br>chicken | P02007,                                 |
| <b>GEWTCKPLAER</b>        | Just<br>chicken | F1NJT3,                                 |
| <b>IIEASESVR</b>          | Just<br>chicken | F1NJD5,                                 |
| <b>LAPYADEVHQIGTNIR</b>   | Just<br>chicken | O93601,                                 |



|                             |                 |                                                   |
|-----------------------------|-----------------|---------------------------------------------------|
| <b>RESPSLVDK</b>            | Just<br>chicken | F1P4V1,P14448,                                    |
| <b>GNEENYFSTR</b>           | Just<br>chicken | F1NWN4,                                           |
| <b>HICEESSAQDVIK</b>        | Just<br>chicken | E1BST4,                                           |
| <b>VSYPITGGTPNVVTVDGSK</b>  | Just<br>chicken | F1N8F5,P10039,Q90995,F1N8F4,Q90994,F1N8F6,Q90824, |
| <b>TYFPHFDLSHGSAQIK</b>     | Just<br>chicken | G1K311,F1NEY9,P01994,                             |
| <b>VEVLHNNVWGTVCDDNWDLR</b> | Just<br>chicken | Q98TD1,                                           |
| <b>DAEQWFFSK</b>            | Just<br>chicken | Q6PVZ1,F1NPR7,F1NDP0,                             |
| <b>DVKDDSIFLNNK</b>         | Just<br>chicken | Q5F381,F1NV09,                                    |
| <b>SLQDAVVTR</b>            | Just<br>chicken | F1NG70,                                           |
| <b>SAPFNFQGAR</b>           | Just<br>chicken | F1N851,Q5ZJR5,F1P328,                             |
| <b>EKDYESLSQPSFFDR</b>      | Just<br>chicken | P15988,                                           |
| <b>YFVLNNAGSLIPTMAVSQLR</b> | Just<br>chicken | F1P350,P87498,E1BY96,                             |
| <b>DLDVEETINNIEMIK</b>      | Just<br>chicken | F1NFE0,P20785,F1NBG1,                             |
| <b>CPVGYTGLSCQR</b>         | Just<br>chicken | Q6KDZ1,                                           |
| <b>LATALSLNNNK</b>          | Just<br>chicken | F1NV02,Q197X2,Q7LZ77,F1NRG7,                      |
| <b>AEICESFLR</b>            | Just<br>chicken | F1NJA6,P20740,F1NJA7,F1NJA5,E1C546,F1NU63,        |

|                                       |                 |                                                   |
|---------------------------------------|-----------------|---------------------------------------------------|
| <b>IAPSNAEFAFR</b>                    | Just<br>chicken | E1C7T1,                                           |
| <b>GHEYSIQFAEMK</b>                   | Just<br>chicken | F1N8F5,P10039,Q90995,F1N8F4,Q90994,F1N8F6,Q90824, |
| <b>LEVITSNSIGFGK</b>                  | Just<br>chicken | Q90998,                                           |
| <b>PAPDFTATAVMPDGQFK</b>              | Just<br>chicken | P0CB50,G1K326,                                    |
| <b>IQYFSTDPEHR</b>                    | Just<br>chicken | F1NG70,                                           |
| <b>KIQMQSGTAYSHR</b>                  | Just<br>chicken | Q197X2,                                           |
| <b>HGNVVHLYER</b>                     | Just<br>chicken | Q8JHF6,                                           |
| <b>AIFLADGNIFTTGFSR</b>               | Just<br>chicken | Q5ZI60,F1NXA5,                                    |
| <b>YALTVSALYASGAGEALSGETL<br/>EER</b> | Just<br>chicken | P13944,F1NKN1,F1NM33,F1NX22,                      |
| <b>PSSTWLTAYVAK</b>                   | Just<br>chicken | Q2MV09,Q90633,A6N9E0<br>,                         |
| <b>QIGEALPVSCTISSSR</b>               | Just<br>chicken | P42292,F1NL79,                                    |
| <b>VEVLHNDVWGTVCDEGWDLR</b>           | Just<br>chicken | Q98TD1,                                           |
| <b>LTQVSVADSGEYVCR</b>                | Just<br>chicken | Q6KDZ1,                                           |
| <b>LKSPPEMQAMSAFNNIK</b>              | Just<br>chicken | F1P4V1,P14448,                                    |
| <b>NSITLTNLLPGTEYVVSIHAVNGR</b>       | Just<br>chicken | F1NJT3,F1NJT4,P11722,                             |
| <b>LPLPLPSSDTPSTLPSSK</b>             | Just<br>chicken | E1BYN5,E1BZD1,                                    |

|                                          |                 |                                         |
|------------------------------------------|-----------------|-----------------------------------------|
| <b>VDTANLQHLESVVTATAANAELV<br/>METLR</b> | Just<br>chicken | F1NIU3,B3VE14,                          |
| <b>APYGIFVVNPR</b>                       | Just<br>chicken | F1NHU4,F1NTQ4,                          |
| <b>SPPGTTMGGFLLFK</b>                    | Just<br>chicken | E1BTB7,                                 |
| <b>ALLLSEIR</b>                          | Just<br>chicken | F1P350,P87498,E1BY96,                   |
| <b>KPITTYVSGGVEEVPLAPTESK</b>            | Just<br>chicken | F1P2F0,                                 |
| <b>VDVGANYITLEEYK</b>                    | Just<br>chicken | F1NV02,Q197X2,                          |
| <b>VLQPVEEVVVINLR</b>                    | Just<br>chicken | P42292,F1NL79,                          |
| <b>TNNMNINNVR</b>                        | Just<br>chicken | F1NV02,Q197X2,                          |
| <b>AMGEQAVALAK</b>                       | Just<br>chicken | E1BR16,F1P0M2,                          |
| <b>TCVAVEYAINHCQTGTHGCDIPQ<br/>R</b>     | Just<br>chicken | F1NP23,                                 |
| <b>ESNMQVASFVYSHMK</b>                   | Just<br>chicken | P02845,Q6BCB8,F1NV01,F1NFL6,E1BYN6<br>, |
| <b>EASVMVTIQPSGASSYPSGVTPP<br/>VR</b>    | Just<br>chicken | Q6KDZ1,                                 |
| <b>FEVEIVSTGEVK</b>                      | Just<br>chicken | F1NV02,Q197X2,                          |
| <b>ELVFSDFHTLPR</b>                      | Just<br>chicken | Q6KDZ1,                                 |
| <b>AGVMGPAGNR</b>                        | Just<br>chicken | P02467,F1POH9,F1NCRO,                   |
| <b>RKPQMTEEQIK</b>                       | Just<br>chicken | P19121,F2Z4L6,                          |

|                                        |                 |                                            |
|----------------------------------------|-----------------|--------------------------------------------|
| <b>ILELPYASGDLSMLVLLPDEVSGLE<br/>R</b> | Just<br>chicken | P01014,                                    |
| <b>VPSYTIDLNEIK</b>                    | Just<br>chicken | F1NV02,Q197X2,                             |
| <b>VTTENTYADDR</b>                     | Just<br>chicken | F1NZZ2,                                    |
| <b>LKPEAITQIQPQK</b>                   | Just<br>chicken | F1N8N7,P07228,                             |
| <b>EPTKEVLQEAGK</b>                    | Just<br>chicken | Q5ZLZ6,                                    |
| <b>VSHQVEECIAFR</b>                    | Just<br>chicken | Q90633,                                    |
| <b>PGPPGPVGPDPDECEILDIIMK</b>          | Just<br>chicken | F1NFE0,P20785,F1NBG1,                      |
| <b>EQFEDALR</b>                        | Just<br>chicken | F1NGP2,Q9YGP0,F1N8Q8,                      |
| <b>LDREVEVEDFQR</b>                    | Just<br>chicken | F1NSZ5,                                    |
| <b>IENVLTFAPR</b>                      | Just<br>chicken | O57484,Q01636,                             |
| <b>MDGDTCEGWK</b>                      | Just<br>chicken | F1NTM6,F1NWR2,Q90997<br>,                  |
| <b>NWMNSLGVTPR</b>                     | Just<br>chicken | Q5ZLW0,                                    |
| <b>DILSALAEVEQLSR</b>                  | Just<br>chicken | F1NJ23,                                    |
| <b>FSGIDEHGHLTISTEMEGR</b>             | Just<br>chicken | F1NP23,                                    |
| <b>CRQEIPEIDCDQYPTR</b>                | Just<br>chicken | F1NFY4,P10184,F1NMN2,                      |
| <b>LMLEMDGTENK</b>                     | Just<br>chicken | Q5ZIQ4,F1NG74,P51913,F1NZE7,O57391,F1NZ78, |

|                                              |                 |                                         |
|----------------------------------------------|-----------------|-----------------------------------------|
| <b>STDLSTCGQPAETAQTK</b>                     | Just<br>chicken | F1P4I7,E1BUA7,Q5ZHM4,                   |
| <b>NIFFSPVSISAAFAMLALGAR</b>                 | Just<br>chicken | E1BS56,                                 |
| <b>SPDDDVFIHLAK</b>                          | Just<br>chicken | E1C041,                                 |
| <b>VPEVPSGASVHIEPYTELYHASSS<br/>VITSSSTR</b> | Just<br>chicken | F1NP23,                                 |
| <b>TNSILFIGR</b>                             | Just<br>chicken | P13731,                                 |
| <b>LDSSIDEILADIR</b>                         | Just<br>chicken | E1BXK1,                                 |
| <b>QLNIGVALDEVMR</b>                         | Just<br>chicken | F1P2F0,P15989,                          |
| <b>IVAISAPLYVR</b>                           | Just<br>chicken | Q98923,Q98922,Q90880,Q90989,Q9892<br>1, |
| <b>FVCMLVTEDDVSEEPTVVK</b>                   | Just<br>chicken | P42292,F1NL79,                          |
| <b>LEEYHGFWPR</b>                            | Just<br>chicken | E1BYN5,E1BZD1,                          |
| <b>NVFTVSSGSR</b>                            | Just<br>chicken | F1P2F0,P15989,                          |
| <b>LNIIATDHAYR</b>                           | Just<br>chicken | F1NFE0,P20785,F1NBG1,                   |
| <b>QTLPQSIEQLTQK</b>                         | Just<br>chicken | F1NSM9,E1BV78,O93568,                   |
| <b>DVYFWVLPSSFTGDK</b>                       | Just<br>chicken | Q6KDZ1,                                 |
| <b>IRDMVDVYLETVK</b>                         | Just<br>chicken | F1N8F3,P08250,                          |
| <b>FYTVISSLK</b>                             | Just<br>chicken | E1BQC2,P02789,E1BS66,F1NL17,            |

|                                         |                 |                                                   |
|-----------------------------------------|-----------------|---------------------------------------------------|
| <b>DQQCITLAENTK</b>                     | Just<br>chicken | F1NWX6,                                           |
| <b>NCLHHTTGFK</b>                       | Just<br>chicken | F1NSZ5,                                           |
| <b>VEDIWSFLSK</b>                       | Just<br>chicken | Q4ADG4,E1BQC2,Q4ADJ6,P02789,E1BS66,Q4ADJ7,F1NL17, |
| <b>KTPLNAESLTR</b>                      | Just<br>chicken | Q5F381,F1NV09,                                    |
| <b>AGFFGLSAANPQGCQR</b>                 | Just<br>chicken | O57484,                                           |
| <b>ADFFTVTK</b>                         | Just<br>chicken | E1C1G2,E1BV96,P84407,                             |
| <b>LSDGVFNK</b>                         | Just<br>chicken | E1C7T4,                                           |
| <b>DVTTNVLDELLPIQEDVEK</b>              | Just<br>chicken | F1NQ51,                                           |
| <b>HKGVDVICADGATVYAPFSGELS<br/>GPVK</b> | Just<br>chicken | P08940,F1NEF7,F1NXC3,                             |
| <b>LEIGSVDCSK</b>                       | Just<br>chicken | F1NFY4,P10184,F1NMN2,                             |
| <b>IPLMQEILLR</b>                       | Just<br>chicken | Q5ZK45,F1NYK3,                                    |
| <b>IYDSFTVEEYVLPK</b>                   | Just<br>chicken | F1NTK2,                                           |
| <b>GLTPSEPITIMEK</b>                    | Just<br>chicken | P13944,F1NKN1,F1NM33,F1NX22,                      |
| <b>YRVEYYPTTGGPPK</b>                   | Just<br>chicken | P13944,F1NKN1,F1NM33,F1NX22,                      |
| <b>ALTDDYLNNGNFQYK</b>                  | Just<br>chicken | F1NDP3,                                           |
| <b>TGNVNPLVVDLVTYTLGLLPSPTP<br/>K</b>   | Just<br>chicken | F1NV02,Q197X2,                                    |

|                                          |                 |                                                   |
|------------------------------------------|-----------------|---------------------------------------------------|
| <b>VYQAEQLVFTSITEADAGIYTCH<br/>AANK</b>  | Just<br>chicken | F1NLV8,Q91048,                                    |
| <b>TQELLDILDEK</b>                       | Just<br>chicken | F1NIV0,                                           |
| <b>VKVEDIDEPQHR</b>                      | Just<br>chicken | Q8AYD0,F1P1Y9,                                    |
| <b>VLNNMQIGNSLFDEEGSK</b>                | Just<br>chicken | F1NU17,P51903,                                    |
| <b>LVCADAGNPAPVFSFFR</b>                 | Just<br>chicken | F1NXW9,Q98923,E1C6L8,Q98922,Q90880,Q90989,Q98921, |
| <b>WSVVSNGDVECTVVDETKDCIHK</b>           | Just<br>chicken | Q4ADG4,E1BQC2,Q4ADJ6,P02789,E1BS66,Q4ADJ7,F1NL17, |
| <b>SCEGCVYSSCLCAGEVK</b>                 | Just<br>chicken | F1NIV0,                                           |
| <b>PSLPQGASDDTK</b>                      | Just<br>chicken | F1NKF3,O93510,                                    |
| <b>VTAPPTVTVVAGDTATLHCSATG<br/>EPEPR</b> | Just<br>chicken | F1NAT6,Q6KDZ1,                                    |
| <b>AGGQPACECLPGYAGDGR</b>                | Just<br>chicken | F1NDL4,                                           |
| <b>TAQVQGSCEPNLK</b>                     | Just<br>chicken | F1NX60,O73775,                                    |
| <b>VGETPPVCAQPAPLR</b>                   | Just<br>chicken | F1N822,                                           |
| <b>ILNIFGAIQGFEEPDR</b>                  | Just<br>chicken | F1NTM6,F1NWR2,Q90997<br>,                         |
| <b>GEMPTISNQR</b>                        | Just<br>chicken | E1BYN5,                                           |
| <b>KVVAALIEAANHIDDIAGTLSK</b>            | Just<br>chicken | G1K311,F1NEY9,P01994,                             |
| <b>ICQEWSSQTPHK</b>                      | Just<br>chicken | F1NWX6,                                           |

|                                                |                 |                       |
|------------------------------------------------|-----------------|-----------------------|
| <b>IKDCCEKPIVER</b>                            | Just<br>chicken | P19121,F2Z4L6,        |
| <b>FSTMPFLYCNPGDICYANR</b>                     | Just<br>chicken | F1P2Q3,               |
| <b>FSTLVAAIQSAGLMENLNRPGTFT<br/>VFAPTNEAFR</b> | Just<br>chicken | O42390,F1P494,        |
| <b>SPAVITDQVIPVCLPK</b>                        | Just<br>chicken | F1NWX6,               |
| <b>LASESATSFR</b>                              | Just<br>chicken | F1P2F0,P15989,        |
| <b>DAGSFQCVAR</b>                              | Just<br>chicken | F1NLV8,Q91048,        |
| <b>LVAPYQGPGEDLTLEEK</b>                       | Just<br>chicken | F1NP23,               |
| <b>DDQESIPISK</b>                              | Just<br>chicken | F1NJT3,F1NJT4,P11722, |
| <b>ILENMHESCK</b>                              | Just<br>chicken | F1P4V1,P14448,        |
| <b>YIEDKEVCK</b>                               | Just<br>chicken | P19121,F2Z4L6,        |
| <b>MEAAIAEAEER</b>                             | Just<br>chicken | O93532,               |
| <b>YNRVEDIIQAINFPYR</b>                        | Just<br>chicken | F1NKN1,F1NM33,F1NX22, |
| <b>ENAVDAIHGPGYGFLSER</b>                      | Just<br>chicken | Q8JHF6,               |
| <b>QGFQLAEDGHSCK</b>                           | Just<br>chicken | F1NWN4,               |
| <b>LPTDAAAVLR</b>                              | Just<br>chicken | F1NLU4,               |
| <b>EALLEAVTNLPYK</b>                           | Just<br>chicken | F1NKN1,F1NM33,F1NX22, |



|                              |                 |                              |
|------------------------------|-----------------|------------------------------|
| <b>TGAVYACPLSASK</b>         | Just<br>chicken | Q98TT7,                      |
| <b>DILNQITKPNDVYSFSLASR</b>  | Just<br>chicken | P01012,                      |
| <b>VVTLDQIESVWVQFASEQPYR</b> | Just<br>chicken | E1BYN5,E1BZD1,               |
| <b>VPGVTLYYQGLR</b>          | Just<br>chicken | F1P350,P87498,E1BY96,        |
| <b>ALEPFATELR</b>            | Just<br>chicken | O93601,                      |
| <b>VYLVPAEQFTMEFVEPK</b>     | Just<br>chicken | F1NZZ2,                      |
| <b>FDDGALDPGYPR</b>          | Just<br>chicken | O12945,E1C7A7,F1NER8,        |
| <b>AEGCLMSNLVQER</b>         | Just<br>chicken | Q90998,                      |
| <b>ATAVSLLEWQR</b>           | Just<br>chicken | F1P350,P87498,E1BY96,        |
| <b>FHMLFTPSEQSSAWK</b>       | Just<br>chicken | Q197X2,                      |
| <b>IGYQSTPTR</b>             | Just<br>chicken | F1NKB2,Q9DDR6,F1NII7,F1NJQ9, |
| <b>ATGTLSVIASGLDR</b>        | Just<br>chicken | P33145,                      |
| <b>VLGQEIAFVDIDNGIIQQAMK</b> | Just<br>chicken | E1BYN5,E1BZD1,               |
| <b>VTWTAPTSIVLSSFLVR</b>     | Just<br>chicken | F1NJT3,F1NJT4,P11722,        |
| <b>VYIYHGSK</b>              | Just<br>chicken | P26007,F1POM0,F1POB0,        |
| <b>LILVNAIFYK</b>            | Just<br>chicken | O73790,                      |

|                                 |              |                                                                                                                         |
|---------------------------------|--------------|-------------------------------------------------------------------------------------------------------------------------|
| <b>TPDGPGHSGPSNLEVLEHGPDVLR</b> | Just chicken | F1NBA6,                                                                                                                 |
| <b>TTVGECSYNEYPR</b>            | Just chicken | F1NUE3,                                                                                                                 |
| <b>SSLSFSCDPGYSLVGSR</b>        | Just chicken | F1NYG4,E1BSE0,                                                                                                          |
| <b>IEDTNDNAPTFK</b>             | Just chicken | F1NJD7,                                                                                                                 |
| <b>YCDTPGEYWLGN DK</b>          | Just chicken | F1NUL9,B4ZCM0,F1P5F9,Q02020,                                                                                            |
| <b>ATGNQFALYMVMEAK</b>          | Just chicken | E1BX43,                                                                                                                 |
| <b>FASFEAQGALQNMAVGK</b>        | Just chicken | Q3HM56,E9M255,Q6UZ97,B6RCN3,B6RCN2,B6RCN1,E9M254,B6RCM6,B6RCN4,B6RCM8,F1C6X4,B6RCM9,F1C6X7,B6RCM1,Q4U5Z6,F1C6X2,B6RCM7, |
| <b>NVLQPSSVDSQTAMVLVNAIVFK</b>  | Just chicken | P01012,                                                                                                                 |
| <b>LRDSYGAMADCCSK</b>           | Just chicken | P19121,F2Z4L6,                                                                                                          |
| <b>AHHFVEQVAQQLTLAR</b>         | Just chicken | P15988,                                                                                                                 |
| <b>CCQLPEDR</b>                 | Just chicken | F2Z4L6,                                                                                                                 |
| <b>IQVTIQAGDQAPTK</b>           | Just chicken | F1P350,P87498,E1BY96,                                                                                                   |
| <b>ITDETTDSFIVGWTPAPGNVLR</b>   | Just chicken | P13944,F1NKN1,F1NM33,F1NX22,                                                                                            |
| <b>EGFGHLSPDDTTEFWLGNEK</b>     | Just chicken | F1NSM9,E1BV78,O93568,                                                                                                   |
| <b>VYLMNSPNTVFPSDIITK</b>       | Just chicken | E1BYN5,E1BZD1,                                                                                                          |

|                                      |                 |                                         |
|--------------------------------------|-----------------|-----------------------------------------|
| <b>EYFGAICSCTCYGGQQGWR</b>           | Just<br>chicken | F1NJT3,                                 |
| <b>PGTTEATITGLEPGTEYTIYIIAVK</b>     | Just<br>chicken | F1NJT3,F1NJT4,P11722,                   |
| <b>AGGAGVQLR</b>                     | Just<br>chicken | F1N9I4,                                 |
| <b>VVATEETPSHDNYIMSILTVIK</b>        | Just<br>chicken | Q90633,                                 |
| <b>QINAFVEAK</b>                     | Just<br>chicken | F1NDH2,                                 |
| <b>TCSAAQQQVCPDR</b>                 | Just<br>chicken | F1NLU4,                                 |
| <b>ASGGFQIAK</b>                     | Just<br>chicken | F1NGX1,F1NWS1,P26008,                   |
| <b>ALQFAMAENR</b>                    | Just<br>chicken | P01038,                                 |
| <b>ITATYEPGVANSLCDGK</b>             | Just<br>chicken | F1N8P9,F1NM47,                          |
| <b>IVLMPVHTDADIDKIQLEIQAGSR</b>      | Just<br>chicken | P02845,Q6BCB8,F1NV01,F1NFL6,E1BYN6<br>, |
| <b>RLRDEGVELYAIGIK</b>               | Just<br>chicken | P13944,F1NKN1,F1NM33,F1NX22,            |
| <b>SAALELGTALHFYGA AVR</b>           | Just<br>chicken | F1NP23,                                 |
| <b>YQYNTDVVFDSEGK</b>                | Just<br>chicken | F1P4I7,Q5ZHM4,                          |
| <b>YSFCTEQNVLVQTR</b>                | Just<br>chicken | F1NJT3,                                 |
| <b>ISTSMPVLDLIDAIQPGSIK</b>          | Just<br>chicken | Q5ZLW0,                                 |
| <b>VFDETTNSLSVQWDHADGPVQQ<br/>YR</b> | Just<br>chicken | P13944,F1NKN1,F1NM33,F1NX22,            |

|                               |                 |                       |
|-------------------------------|-----------------|-----------------------|
| <b>LLQLLNSQR</b>              | Just<br>chicken | E1C7T1,               |
| <b>ILGEELGYMK</b>             | Just<br>chicken | F1NV02,Q197X2,        |
| <b>KNEVEIPVDSTSFILR</b>       | Just<br>chicken | F1N8F5,F1N8F4,F1N8F6, |
| <b>RKPDEVLDGGSAPLK</b>        | Just<br>chicken | F1NL31,P17790,        |
| <b>LAEQLMEK</b>               | Just<br>chicken | P02659,               |
| <b>MAEAVTDLAK</b>             | Just<br>chicken | E1C1G2,E1BV96,P84407, |
| <b>KVQVGLLVTK</b>             | Just<br>chicken | E1C6L4,               |
| <b>SCIDINECWNPGR</b>          | Just<br>chicken | F1NWN4,               |
| <b>GGQQVNVGEALEFVAK</b>       | Just<br>chicken | F1P2F0,P15989,        |
| <b>VPLTGLGQPLAER</b>          | Just<br>chicken | F1NBA6,               |
| <b>ECSFCTEESFEPR</b>          | Just<br>chicken | E1C9G7,               |
| <b>LAMQEFMILPVGADNFK</b>      | Just<br>chicken | Q5ZIQ4,F1NZE7,F1NZ78, |
| <b>SEVDDAFLSDEDITSR</b>       | Just<br>chicken | Q90633,               |
| <b>TGTCNFDEYFSEGCAPGSPNSR</b> | Just<br>chicken | P02789,Q4ADJ7,        |
| <b>DWLVIPDAAAAYIEAVNK</b>     | Just<br>chicken | P02659,               |
| <b>VVDVNDNAPK</b>             | Just<br>chicken | O93319,F1P1Y0,        |

|                                            |                 |                       |
|--------------------------------------------|-----------------|-----------------------|
| <b>CLSFECPSNYR</b>                         | Just<br>chicken | F1NWN4,               |
| <b>MENAELDIPIQNIFTR</b>                    | Just<br>chicken | F1P0J8,               |
| <b>FFASFGNLSSPTAILGNPMVR</b>               | Just<br>chicken | F1N9X1,P02112,        |
| <b>KCPDYTCPITFANPADIMLLVDSS<br/>TSVGSK</b> | Just<br>chicken | P20785,               |
| <b>CDVGGSLGPSCEER</b>                      | Just<br>chicken | F1NZZ2,               |
| <b>VGLVQFSDTPK</b>                         | Just<br>chicken | F1P2F0,P15989,        |
| <b>ATITGLKPGVDYTITVYAVTGR</b>              | Just<br>chicken | F1NJT3,F1NJT4,P11722, |
| <b>TVAWLVTPK</b>                           | Just<br>chicken | E1C544,               |
| <b>MPSNLQDLAAYTSLK</b>                     | Just<br>chicken | F1NZZ2,               |
| <b>NQLQVITNDPGR</b>                        | Just<br>chicken | F1P2F0,P15989,        |
| <b>HTNVPDVFLGK</b>                         | Just<br>chicken | Q9W6F5,F1NVF3,        |
| <b>RPCFTAMGVDTK</b>                        | Just<br>chicken | P19121,F2Z4L6,        |
| <b>LGPLASLITAEDVSK</b>                     | Just<br>chicken | F1NZV7,               |
| <b>YTPLFTTTGSQK</b>                        | Just<br>chicken | F1NV02,Q197X2,        |
| <b>DGNTMVACPR</b>                          | Just<br>chicken | F1NFY4,P10184,F1NMN2, |
| <b>LIYHGYSLLYVQGNER</b>                    | Just<br>chicken | Q9I9K3,F1P2R3,F1NA18, |

|                                     |                 |                                     |
|-------------------------------------|-----------------|-------------------------------------|
| <b>RVHPISTAVK</b>                   | Just<br>chicken | P00340,F1NW35,E1BTT8,               |
| <b>DEQLSCWVVEIPYR</b>               | Just<br>chicken | E1C7T1,                             |
| <b>VVAHALAR</b>                     | Just<br>chicken | F1NMZ3,E1C3W0,P02128,F1N9X1,P02112, |
| <b>VEDIIQAINFPYR</b>                | Just<br>chicken | F1NKN1,F1NM33,F1NX22,               |
| <b>DYTPEVHAAFDKFLSAVSAVLAEK</b>     | Just<br>chicken | P02001,E1C4M2,                      |
| <b>DFTPECQAAWQK</b>                 | Just<br>chicken | E1C3W0,F1N9X1,P02112,               |
| <b>VQGYDGDIIYAFER</b>               | Just<br>chicken | Q8AYD0,F1P1Y9,                      |
| <b>NVQYDDVDPYKDR</b>                | Just<br>chicken | P42292,F1NL79,                      |
| <b>GEPGPLGETGDEGSPGADGPPGER</b>     | Just<br>chicken | F1NFE0,P20785,F1N8G1,               |
| <b>LDTSGGSVSLSSGR</b>               | Just<br>chicken | F1NV02,Q197X2,                      |
| <b>SMQAELIAK</b>                    | Just<br>chicken | F1NV02,Q197X2,                      |
| <b>KIDNLDALLAAAAEVAGQAALR</b>       | Just<br>chicken | F1NTM6,F1NWR2,Q90997,               |
| <b>QPPNVDEAIEIPGYQVPIIVVPSYPSYR</b> | Just<br>chicken | F1NJT3,F1NJT4,P11722,               |
| <b>LSIDGQQHSGGLK</b>                | Just<br>chicken | F1NSM9,E1BV78,O93568,               |
| <b>STEDGVKEESHM</b>                 | Just<br>chicken | Q5ZLZ6,                             |
| <b>TSAAQAIHPGYGFLSENTEFAELCK</b>    | Just<br>chicken | Q5ZK45,F1NYK3,                      |

|                                            |                 |                                                   |
|--------------------------------------------|-----------------|---------------------------------------------------|
| <b>NSIAGQWTQPVWMGELR</b>                   | Just<br>chicken | P02845,Q6BCB8,F1NV01,F1NFL6,E1BYN6                |
| <b>VCPRPPEVLFATINVVK</b>                   | Just<br>chicken | F1NYG4,E1BSE0,                                    |
| <b>TDLGSPEGIALDHLGR</b>                    | Just<br>chicken | F1NP23,Q9I9K4,F1NC71,                             |
| <b>LDVDECLDPDNCK</b>                       | Just<br>chicken | F1NII7,F1NJQ9,                                    |
| <b>VHAKDPDAANSAIR</b>                      | Just<br>chicken | O93319,F1P1Y0,                                    |
| <b>TEGYILSLYR</b>                          | Just<br>chicken | E1BQ57,                                           |
| <b>ADVKPLLSILR</b>                         | Just<br>chicken | E1BR88,O93586,F1NN42,E1BXR4,                      |
| <b>VPSLMDSQLYLGFEYSAIQSMR</b>              | Just<br>chicken | Q4ADG4,E1BQC2,Q4ADJ6,P02789,E1BS66,Q4ADJ7,F1NL17, |
| <b>ASFYGLSHAVTK</b>                        | Just<br>chicken | F1NV02,Q197X2,                                    |
| <b>VSQPDFVQPYQRPASDVICQEYQ<br/>DNR</b>     | Just<br>chicken | P19121,F2Z4L6,                                    |
| <b>TGPAATTLTDAAAAETLVDSSEV<br/>VVIGFFK</b> | Just<br>chicken | P09102,F1N9H3,                                    |
| <b>TYFADAQPADFSDPNFITK</b>                 | Just<br>chicken | O73840,F1NJ16,                                    |
| <b>GSLQYQFGSELLQLPVHLFK</b>                | Just<br>chicken | F1P350,P87498,E1BY96,                             |
| <b>GPQELEESFSR</b>                         | Just<br>chicken | Q8JHF6,                                           |
| <b>NPVLQQVACLGYSSVVNR</b>                  | Just<br>chicken | P02845,Q6BCB8,F1NV01,F1NFL6,E1BYN6                |
| <b>FCEVAAANGMDIFR</b>                      | Just<br>chicken | Q8JHF6,                                           |

|                                 |                 |                                    |
|---------------------------------|-----------------|------------------------------------|
| <b>SSGDLQSCFEFHDEPEMAK</b>      | Just<br>chicken | P01038,                            |
| <b>NIYSLASEPNDVFFK</b>          | Just<br>chicken | F1P2F0,P15989,                     |
| <b>IAKGYESLLEK</b>              | Just<br>chicken | P19121,F2Z4L6,                     |
| <b>NLKPVCGTDGSTYSNECGICLYNR</b> | Just<br>chicken | F1NFY4,P10184,F1NMN2,F1NUT1,       |
| <b>FGELSPESYYWQLPQPYLGDK</b>    | Just<br>chicken | Q6KDZ1,                            |
| <b>TEISFTVNDPK</b>              | Just<br>chicken | P08251,F1NSV6,F1NRB7,              |
| <b>SFEAGHDAFMAEFVYEYSR</b>      | Just<br>chicken | P19121,F2Z4L6,                     |
| <b>SFLSIVHVPEMMPCGK</b>         | Just<br>chicken | F1NTK2,                            |
| <b>EHFAMQGPDSMPR</b>            | Just<br>chicken | P02845,Q6BCB8,F1NV01,F1NFL6,E1BYN6 |
| <b>AGGVASGFR</b>                | Just<br>chicken | ,<br>F1NKF3,O93510,                |
| <b>LFLEGPTIAEEFEVELER</b>       | Just<br>chicken | Q8JHF6,                            |
| <b>SLEEDLKK</b>                 | Just<br>chicken | E1C344,Q6QAZ9,F1N9S7,Q92108,       |
| <b>INMPIPTFASLNL</b>            | Just<br>chicken | F1NXT0,F1NFH3,Q49MC0,P09654,F1NJ08 |
| <b>ASAFCMSPDTGFGLSPTVSLR</b>    | Just<br>chicken | ,<br>E1C544,                       |
| <b>ISQAVHAAHAEINEAGR</b>        | Just<br>chicken | P01012,                            |
| <b>STAPDLQMMASACR</b>           | Just<br>chicken | F1P350,P87498,E1BY96,              |



|                                       |                 |                                                                                          |
|---------------------------------------|-----------------|------------------------------------------------------------------------------------------|
| <b>WIAGGTHTGEALQFSK</b>               | Just<br>chicken | F1NFE0,P20785,F1NBG1,                                                                    |
| <b>KYVYLYEAETSSGITGTADSHSGS<br/>K</b> | Just<br>chicken | F1NV02,                                                                                  |
| <b>GGLALGAGMGSGALGFSSGGST<br/>K</b>   | Just<br>chicken | O93532,                                                                                  |
| <b>LTVSPLPTLSTSDK</b>                 | Just<br>chicken | E1BST4,                                                                                  |
| <b>ADLVNNLGTIAK</b>                   | Just<br>chicken | F1NKM6,P11501,Q2XQE5,F1NKM8,Q5ZMA5,Q04619,Q5ZKZ3,F1<br>NC33,Q5ZIC0,F1NDI7,F1NVN4,F1NKM3, |
| <b>LNSYTGIVYLQR</b>                   | Just<br>chicken | F1NWN4,                                                                                  |
| <b>GVGQCGQSSPCLHAPCLHGGR</b>          | Just<br>chicken | F1NAT6,Q6KDZ1,                                                                           |
| <b>HIATNAVLFFGR</b>                   | Just<br>chicken | P01012,                                                                                  |
| <b>DEVLFSNWEALFTGSEAPLR</b>           | Just<br>chicken | F1NEY6,O93419,F1NW38,                                                                    |
| <b>MEPSSPLHEGDSVR</b>                 | Just<br>chicken | Q98923,Q98922,Q90880,Q90989,Q9892<br>1,                                                  |
| <b>IHLITTQSTLPYALR</b>                | Just<br>chicken | F1NSM9,E1BV78,O93568,                                                                    |
| <b>DHMHHNAEAAAACK</b>                 | Just<br>chicken | E1BS56,                                                                                  |
| <b>ISTDPESVIGLAVVDK</b>               | Just<br>chicken | F1NX21,F1NX20,                                                                           |
| <b>LAQTVEAFR</b>                      | Just<br>chicken | O93601,                                                                                  |
| <b>LIALGEHTGDLYSK</b>                 | Just<br>chicken | F1NV02,Q197X2,                                                                           |
| <b>LFAVAPSEDVYEQGLR</b>               | Just<br>chicken | P15988,                                                                                  |

|                                   |                 |                                    |
|-----------------------------------|-----------------|------------------------------------|
| <b>TCESLGGGGYR</b>                | Just<br>chicken | Q6KDZ1,                            |
| <b>TLSLLTMSNR</b>                 | Just<br>chicken | Q9W6F5,F1NVF3,                     |
| <b>GGNSNGALCHFPFLYNNR</b>         | Just<br>chicken | F1NJT3,                            |
| <b>IYLYTLNENAR</b>                | Just<br>chicken | F1NJT3,F1NJT4,P11722,              |
| <b>AHPITNAIDGTER</b>              | Just<br>chicken | F1NZZ2,F1NQ51,                     |
| <b>MMACAVIFETRPALALITTIANVAMK</b> | Just<br>chicken | P02845,Q6BCB8,F1NV01,F1NFL6,E1BYN6 |
| <b>RSQHIVFDVQVPK</b>              | Just<br>chicken | F1NIU3,B3VE14,                     |
| <b>IPFTEDNWEDETGAPVSR</b>         | Just<br>chicken | Q6KDZ1,                            |
| <b>NCQPIIFDSTGNR</b>              | Just<br>chicken | F1NGX1,F1NWS1,P26008,              |
| <b>DMVDVYLETVK</b>                | Just<br>chicken | F1N8F3,P08250,                     |
| <b>DASFIQNTYLHK</b>               | Just<br>chicken | P02845,Q6BCB8,F1NV01,F1NFL6,E1BYN6 |
| <b>IVIQNNACGK</b>                 | Just<br>chicken | Q98UI9,F1NZY2,                     |
| <b>VAFWMVGK</b>                   | Just<br>chicken | E1BYN5,E1BZD1,                     |
| <b>IEEGIPQFLVLLAAGR</b>           | Just<br>chicken | F1P2F0,P15989,                     |
| <b>LADNLDLSAAAAK</b>              | Just<br>chicken | F1N8F3,P08250,                     |
| <b>HSIGSSTSSHVTGAGSSHLGTGGK</b>   | Just<br>chicken | F1P4V1,P14448,                     |

|                                 |                 |                                    |
|---------------------------------|-----------------|------------------------------------|
| <b>IGWDTFCIR</b>                | Just<br>chicken | P13944,F1NKN1,F1NM33,F1NX22,       |
| <b>ADTYFDNYR</b>                | Just<br>chicken | P02845,Q6BCB8,F1NV01,F1NFL6,E1BYN6 |
| <b>VQIGLAQYSGDPR</b>            | Just<br>chicken | P13944,F1NKN1,F1NM33,F1NX22,       |
| <b>ATSTYTQALLAYTFALAK</b>       | Just<br>chicken | F1NIV0,                            |
| <b>IALTCVQK</b>                 | Just<br>chicken | Q4ADG4,Q4ADJ6,                     |
| <b>LIDDMVAQALK</b>              | Just<br>chicken | F1NPG2,                            |
| <b>LGQYHTVR</b>                 | Just<br>chicken | F1NAT6,Q6KDZ1,                     |
| <b>GVGSTAEFACTASDPR</b>         | Just<br>chicken | F1NAT6,Q6KDZ1,                     |
| <b>MPFINIPVLDINK</b>            | Just<br>chicken | F1NYG0,                            |
| <b>MVVALTSPR</b>                | Just<br>chicken | P02845,Q6BCB8,F1NV01,F1NFL6,E1BYN6 |
| <b>KSDDGYPMPVIR</b>             | Just<br>chicken | F1NV02,Q197X2,                     |
| <b>SLYYFIQQDTK</b>              | Just<br>chicken | P17785,                            |
| <b>HYTIAALLSPFSYSTTAVVSDPQE</b> | Just<br>chicken | F1NMT4,P27731,                     |
| <b>ADFAQACVDAGVR</b>            | Just<br>chicken | Q8JHF6,                            |
| <b>LECSVGLYVDQNSK</b>           | Just<br>chicken | F1NUE3,                            |
| <b>KVISGPDGPREEIVEK</b>         | Just<br>chicken | F1P4V1,P14448,                     |

|                                           |                 |                       |
|-------------------------------------------|-----------------|-----------------------|
| <b>LTQALTGQLSIPIK</b>                     | Just<br>chicken | F1P350,P87498,E1BY96, |
| <b>FPVEEVNLPHTVCPGCSSTIPTD<br/>SAR</b>    | Just<br>chicken | E1BX43,               |
| <b>YKPQITQEQLTSITVAFTAMR</b>              | Just<br>chicken | E1C1G2,E1BV96,P84407, |
| <b>TEGAWLLNSK</b>                         | Just<br>chicken | F1NWX6,               |
| <b>GDGFQCVLGGVIK</b>                      | Just<br>chicken | Q9I9K4,               |
| <b>ADFASTCCPANSPLYCVAQVTA<br/>ELASTCK</b> | Just<br>chicken | Q9W6F5,F1NVF3,        |
| <b>PLALEVEDCTCPPGYR</b>                   | Just<br>chicken | Q6KDZ1,               |
| <b>IRPFLDQFSAK</b>                        | Just<br>chicken | F1N8F3,P08250,        |
| <b>ISPALPSDAGTYR</b>                      | Just<br>chicken | F1NAT6,Q6KDZ1,        |
| <b>YIQVVYLHNNK</b>                        | Just<br>chicken | P28675,               |
| <b>MMTETLVDLHLPK</b>                      | Just<br>chicken | O73790,               |
| <b>ELNEDGTCADSYSFVFSR</b>                 | Just<br>chicken | P41263,               |
| <b>ETQSSYSLVVEGK</b>                      | Just<br>chicken | F1NJD5,               |
| <b>SYLNMDAIMEVIKK</b>                     | Just<br>chicken | E1BR16,F1POM2,        |
| <b>ILEDNQELQSALQEIILPK</b>                | Just<br>chicken | F1NDP3,               |
| <b>LLGGSHLK</b>                           | Just<br>chicken | F1NFE0,P20785,F1NBG1, |

|                                                 |                 |                              |
|-------------------------------------------------|-----------------|------------------------------|
| <b>QAGLSSHLTGSER</b>                            | Just<br>chicken | O42390,F1P494,               |
| <b>QELTNWEIAQTVLVALHSSSPTQ<br/>EVMEEATLIVK</b>  | Just<br>chicken | F1P350,P87498,E1BY96,        |
| <b>TGQLTEEIR</b>                                | Just<br>chicken | F1NEW8,                      |
| <b>DGLLAHAFAPGPGIGGDSHFDDD<br/>ELWTLGEGQVVR</b> | Just<br>chicken | Q90611,                      |
| <b>QQPGQDLTEEELAR</b>                           | Just<br>chicken | F1NM70,Q9W600,F1NP21<br>,    |
| <b>VGETYERPK</b>                                | Just<br>chicken | F1NJT3,                      |
| <b>ALQASALSAWR</b>                              | Just<br>chicken | P53449,                      |
| <b>TPLYQELER</b>                                | Just<br>chicken | E1C041,                      |
| <b>EVFFDVELPK</b>                               | Just<br>chicken | F1NIE2,F1N8L7,F1NIE3,        |
| <b>DLSPDTEYQINVYAMK</b>                         | Just<br>chicken | P13944,F1NKN1,F1NM33,F1NX22, |
| <b>STLFQTINK</b>                                | Just<br>chicken | Q5ZLZ6,                      |
| <b>IAYAPQFILNVESLPR</b>                         | Just<br>chicken | F1P2F0,P15989,               |
| <b>KQLNPAEGMMAIATVK</b>                         | Just<br>chicken | Q90633,                      |
| <b>GLTFTEVDVDSIK</b>                            | Just<br>chicken | F1NJT3,O57403,F1NJT4,P11722, |
| <b>VAVEALLENR</b>                               | Just<br>chicken | E1C311,                      |
| <b>RVPGNTVDAVLGPLEPETK</b>                      | Just<br>chicken | P13944,F1NKN1,F1NM33,F1NX22, |

|                                           |                 |                                     |
|-------------------------------------------|-----------------|-------------------------------------|
| <b>CPDYTCPITFANPADIMLLVDSST<br/>SVGSK</b> | Just<br>chicken | P20785,                             |
| <b>LKPIAAEVYEHTEGSTTSYYAVAV<br/>VK</b>    | Just<br>chicken | E1BQC2,P02789,E1BS66,Q4ADJ7,F1NL17, |
| <b>QSAVLAVGSAQHK</b>                      | Just<br>chicken | Q5UMH8,F1NYP7,                      |
| <b>VLIEMEDWNGDK</b>                       | Just<br>chicken | F1NUL9,B4ZCM0,F1P5F9,Q02020,        |
| <b>CLSLECPENYR</b>                        | Just<br>chicken | F1NX60,O73775,                      |
| <b>EAEELDQLIAR</b>                        | Just<br>chicken | F1NK49,                             |
| <b>LLTDPPLLALK</b>                        | Just<br>chicken | Q8QH01,Q4L2A6,F1NJ87,               |
| <b>DCCEKPIVER</b>                         | Just<br>chicken | P19121,F2Z4L6,                      |
| <b>VNLNVAGLASSITMNTNCDSK</b>              | Just<br>chicken | F1NV02,Q197X2,                      |
| <b>GSQFVYGDTAVTQMTFLR</b>                 | Just<br>chicken | F1P5A7,F1P563,                      |
| <b>YAVSPYTLSLIATPLFIKPLPFFIK</b>          | Just<br>chicken | E1BXV7,E1BRS7,                      |
| <b>VEGTALMLPAVR</b>                       | Just<br>chicken | F1NAT6,                             |
| <b>SHVSDAVAQSTR</b>                       | Just<br>chicken | P00940,                             |
| <b>EATGDYLGIVLK</b>                       | Just<br>chicken | F1NZZ2,                             |
| <b>CKDIDECETGTHNCPDFICQNT<br/>GSFR</b>    | Just<br>chicken | F1NX60,O73775,                      |
| <b>TGLDSPTGLDFSDITANSFTVHWI<br/>APR</b>   | Just<br>chicken | F1NJT3,F1NJT4,P11722,               |

|                                       |                 |                                            |
|---------------------------------------|-----------------|--------------------------------------------|
| <b>IQKNPVLQQVACLGYSVVNR</b>           | Just<br>chicken | P02845,Q6BCB8,F1NV01,F1NFL6,E1BYN6         |
| <b>QLYPASFPEDFSILTTVK</b>             | Just<br>chicken | ,<br>F1NR02,Q9IAU4,F1NR03,F1NR01,Q90589    |
| <b>YSAGEQTDNIVFQDCGDIPTDYK<br/>ER</b> | Just<br>chicken | P08251,F1NSV6,F1NRB7,                      |
| <b>HPLDELGVLCPTGCELQTLLK</b>          | Just<br>chicken | F1NUL9,F1P5F9,Q02020,                      |
| <b>IVLSGAFELNR</b>                    | Just<br>chicken | E1C7P4,                                    |
| <b>LSGLQELNIQK</b>                    | Just<br>chicken | F1NV02,Q197X2,                             |
| <b>VVQCSDLGLER</b>                    | Just<br>chicken | E1BQ80,P28675,E1BRE9,                      |
| <b>FGVEQNVDMVFASFIR</b>               | Just<br>chicken | P00548,F1P4U1,F1NW43,                      |
| <b>FEHPPFISTEDEFQLK</b>               | Just<br>chicken | F1NEQ4,                                    |
| <b>QGYYSALQQDCR</b>                   | Just<br>chicken | F1NJ23,                                    |
| <b>LDKDTLQNVLQVWYGPDEKIPSI<br/>R</b>  | Just<br>chicken | F1P350,P87498,E1BY96,                      |
| <b>LQVFTEDGNLCTFPFR</b>               | Just<br>chicken | E1BZN8,                                    |
| <b>AADGTWQDFATGK</b>                  | Just<br>chicken | F1NMT4,P27731,                             |
| <b>LNRDPGPCSGMLSR</b>                 | Just<br>chicken | F1NUF8,                                    |
| <b>FAQEKDTHLAR</b>                    | Just<br>chicken | E1C1G2,E1BV96,P84407,                      |
| <b>LLLQQTPLPQVPGK</b>                 | Just<br>chicken | F1NJA6,P20740,F1NJA7,F1NJA5,E1C546,F1NU63, |

|                                            |                 |                              |
|--------------------------------------------|-----------------|------------------------------|
| <b>ENSCLAGMIAAK</b>                        | Just<br>chicken | F1NWN4,                      |
| <b>IYVDDGLISLLVK</b>                       | Just<br>chicken | P00548,F1P4U1,F1NW43,        |
| <b>SATLEIQNFDIVCSPVWTSR</b>                | Just<br>chicken | P13944,F1NKN1,F1NM33,F1NX22, |
| <b>FDAGSGMATIRDPTPLR</b>                   | Just<br>chicken | F1NAT6,Q6KDZ1,               |
| <b>FLNEVAQEAPNK</b>                        | Just<br>chicken | E1BS56,                      |
| <b>ACADAVILPLK</b>                         | Just<br>chicken | F1P350,P87498,E1BY96,        |
| <b>NEGKEETNIDEAEK</b>                      | Just<br>chicken | Q5ZLZ6,                      |
| <b>IAGHAEYGAETLER</b>                      | Just<br>chicken | G1K311,F1NEY9,P01994,        |
| <b>SCNVVVAQDCTEHPK</b>                     | Just<br>chicken | F1P350,P87498,E1BY96,        |
| <b>VTSEEVAPLHLANLAGTR</b>                  | Just<br>chicken | Q6KDZ1,                      |
| <b>RGFQLSDIDGISCEDIDECALPTGG<br/>HICFR</b> | Just<br>chicken | F1NX60,O73775,               |
| <b>WGSVCDDNWDK</b>                         | Just<br>chicken | Q98TD1,                      |
| <b>SEVALCSVLSTYSR</b>                      | Just<br>chicken | Q98UI9,F1NZY2,               |
| <b>AVSYFFDGSGYAVAR</b>                     | Just<br>chicken | F1NSZ5,                      |
| <b>QLIYLSQK</b>                            | Just<br>chicken | P19121,F2Z4L6,               |
| <b>LWCQCLGFGSGHFR</b>                      | Just<br>chicken | F1NJT3,F1NJT4,P11722,        |



|                                       |                 |                       |
|---------------------------------------|-----------------|-----------------------|
| <b>GTNLVLFNDK</b>                     | Just<br>chicken | Q98UI9,F1NZY2,        |
| <b>DGSSFSVEVDGMK</b>                  | Just<br>chicken | F1P0M2,               |
| <b>AEVIVTETPTKPITVTVEEK</b>           | Just<br>chicken | Q6KDZ1,               |
| <b>IEGQLEVASVFAR</b>                  | Just<br>chicken | F1NV02,Q197X2,        |
| <b>LGVYEVEDQISAVK</b>                 | Just<br>chicken | F1NDP3,               |
| <b>HPFLYAPTILSVAIHYDEMMKDC<br/>CR</b> | Just<br>chicken | E1C1G2,E1BV96,P84407, |
| <b>HPFLYAPTILSVAIHYDEMMK</b>          | Just<br>chicken | E1C1G2,E1BV96,P84407, |
| <b>EATLNTIIFMGR</b>                   | Just<br>chicken | Q91422,               |
| <b>HDIVFDGVAQIR</b>                   | Just<br>chicken | Q90611,               |
| <b>SQLNNNIYSQDINAYNDAEK</b>           | Just<br>chicken | Q197X2,               |
| <b>GEFTGTYTAVTATSNEIK</b>             | Just<br>chicken | P02701,               |
| <b>IGTFDLYFDKDLPCTVVR</b>             | Just<br>chicken | E1BS56,               |
| <b>CEAQIYVVPWENK</b>                  | Just<br>chicken | E1BX43,               |
| <b>YYWSYDFAHQPTQAECEK</b>             | Just<br>chicken | O12945,E1C7A7,F1NER8, |
| <b>FTTPEFTVLNSFK</b>                  | Just<br>chicken | F1NV02,Q197X2,        |
| <b>IAELAQGAQGVYVCR</b>                | Just<br>chicken | F1NAT6,Q6KDZ1,        |

|                                                |                 |                                                   |
|------------------------------------------------|-----------------|---------------------------------------------------|
| <b>WAFDAAQ GK</b>                              | Just<br>chicken | F1NUF8,                                           |
| <b>QLCDDNGALHTR</b>                            | Just<br>chicken | Q9W6F5,F1NVF3,                                    |
| <b>FLDDAKPLYQLEVLATDFNNPTEA<br/>EKEINDYTEK</b> | Just<br>chicken | E1BS56,                                           |
| <b>LYPEKDEPLNVLNLK</b>                         | Just<br>chicken | F1NV02,Q197X2,                                    |
| <b>LENLIFLYMEK</b>                             | Just<br>chicken | E1C7T4,                                           |
| <b>SLIDDVVSEKDLFTCIPFTIPK</b>                  | Just<br>chicken | E1C544,                                           |
| <b>STDFGLTYEPWQYFASSK</b>                      | Just<br>chicken | F1NZZ2,                                           |
| <b>APVTDYLLTYESIDGR</b>                        | Just<br>chicken | F1N8F5,P10039,Q90995,F1N8F4,Q90994,F1N8F6,Q90824, |
| <b>LDGSTSLTR</b>                               | Just<br>chicken | F1NV02,Q197X2,Q7LZ77,F1NRG7,                      |
| <b>VKPGADVTFICTAK</b>                          | Just<br>chicken | Q6KDZ1,                                           |
| <b>LRELENLIANLGTGEETITDQAFEE<br/>R</b>         | Just<br>chicken | F1NI05,F1NK49,Q90ZN3,                             |
| <b>YFAYDCESSFPGISTGPMK</b>                     | Just<br>chicken | F1NUC1,Q01635,F1NJ23,                             |
| <b>LACCVIGICNK</b>                             | Just<br>chicken | F1NHI4,                                           |
| <b>LSDGFTFSIPELHLK</b>                         | Just<br>chicken | F1NV02,Q197X2,                                    |
| <b>VSTAQELSELNEQVLVTLAAAMK</b>                 | Just<br>chicken | F1P2F0,P15989,                                    |
| <b>NLNVYDIGSTSMR</b>                           | Just<br>chicken | P13944,F1NKN1,F1NM33,F1NX22,                      |

|                                 |                 |                                     |
|---------------------------------|-----------------|-------------------------------------|
| <b>RVLFDTDLVNPR</b>             | Just<br>chicken | F1NDL4,                             |
| <b>AVDFTNPSEATK</b>             | Just<br>chicken | F1NDH2,                             |
| <b>VATGFSVEMGSQGPQLTYGR</b>     | Just<br>chicken | Q6KDZ1,                             |
| <b>ENCCILDER</b>                | Just<br>chicken | F1NSM9,E1BV78,O93568,               |
| <b>YKPNLFATMFGPYSILGR</b>       | Just<br>chicken | F1NHI4,                             |
| <b>YAFIQEDKVQVLELPYK</b>        | Just<br>chicken | F1NLP7,Q91422,F1NLP6,               |
| <b>TCVDVNECDLHPNICLSGTCENTK</b> | Just<br>chicken | F1NJR4,F1NJR3,P87363,F1NII7,F1NJQ9, |
| <b>IFGNQETSAQMK</b>             | Just<br>chicken | F1NIU3,B3VE14,                      |
| <b>ACFQYTANPR</b>               | Just<br>chicken | P26007,F1P0M0,F1P0B0,               |
| <b>FDIEATDHNVPAYYKPGGSR</b>     | Just<br>chicken | Q8AYD0,F1P1Y9,                      |
| <b>NPQKDGEDAYEAK</b>            | Just<br>chicken | P26007,F1P0M0,F1P0B0,               |
| <b>SQSLTSIIR</b>                | Just<br>chicken | E1BYN5,E1BZD1,                      |
| <b>GLCVADPYEITVMK</b>           | Just<br>chicken | Q90633,                             |
| <b>TTPVTVGFHCLPADSANS�TDK</b>   | Just<br>chicken | P02845,F1NFL6,E1BYN6,               |
| <b>PGVVYEGQLISVQQHGPK</b>       | Just<br>chicken | F1NJT3,                             |
| <b>VFIVDTTNIIEAFGPK</b>         | Just<br>chicken | F1NDP3,                             |

|                                         |                 |                                                   |
|-----------------------------------------|-----------------|---------------------------------------------------|
| <b>LEMNYVMGGVVS</b>                     | Just<br>chicken | F1NX60,O73775,                                    |
| <b>FAPISGGDHELTVPK</b>                  | Just<br>chicken | F1N8F5,P10039,Q90995,F1N8F4,Q90994,F1N8F6,Q90824, |
| <b>FSNNLQGS</b>                         | Just<br>chicken | F1NV02,Q197X2,                                    |
| <b>EPQEFWVDSNR</b>                      | Just<br>chicken | F1NDH2,                                           |
| <b>CSCFPEFTLQEDGTSCSPDPDRGQ<br/>VTR</b> | Just<br>chicken | F1NWN4,                                           |
| <b>SNIVPMFEAYITNLR</b>                  | Just<br>chicken | O93532,                                           |
| <b>IYIDCSEILEKPIK</b>                   | Just<br>chicken | P13944,F1NKN1,F1NM33,F1NX22,                      |
| <b>SAMCVFSLR</b>                        | Just<br>chicken | E1BST4,                                           |
| <b>YNDLKEETF</b>                        | Just<br>chicken | P19121,F2Z4L6,                                    |
| <b>DNDGWLTTDPR</b>                      | Just<br>chicken | F1NUL9,B4ZCM0,F1P5F9,Q02020,                      |
| <b>ALALGDLNAAGQR</b>                    | Just<br>chicken | Q8JHF6,                                           |
| <b>INLIANIFNYLDK</b>                    | Just<br>chicken | F1NEW8,                                           |
| <b>ITSDDLEIILEK</b>                     | Just<br>chicken | F1NV02,Q197X2,                                    |
| <b>VLFDLTLVNPR</b>                      | Just<br>chicken | F1NDL4,                                           |
| <b>NADKAELEQIAFNPK</b>                  | Just<br>chicken | F1P2F0,P15989,                                    |
| <b>VVEIAPAAR</b>                        | Just<br>chicken | Q8JHF6,                                           |

|                                       |                 |                                         |
|---------------------------------------|-----------------|-----------------------------------------|
| <b>GEIGPAGNVGPTGPAGPR</b>             | Just<br>chicken | F1P0H9,F1NCR0,                          |
| <b>GQLALNLETK</b>                     | Just<br>chicken | F1NZZ2,                                 |
| <b>VAILYSLTEPLR</b>                   | Just<br>chicken | F1NG70,                                 |
| <b>ITGTVNNDFFLVQPFEIR</b>             | Just<br>chicken | F1NV02,Q197X2,                          |
| <b>GVDVICADGATVYAPFSGELSGP<br/>VK</b> | Just<br>chicken | P08940,F1NEF7,F1NXC3,                   |
| <b>DGVASTYTGAYQWR</b>                 | Just<br>chicken | F1NP23,                                 |
| <b>SQCIMEAEFDEKPADLPSLVEK</b>         | Just<br>chicken | P19121,F2Z4L6,                          |
| <b>IDAAFNWGR</b>                      | Just<br>chicken | Q90611,                                 |
| <b>TFEGNTNYDTPELR</b>                 | Just<br>chicken | F1N8P1,P79795,                          |
| <b>TVGLLPQNIYITDEWYTR</b>             | Just<br>chicken | P13944,F1NKN1,F1NM33,F1NX22,            |
| <b>MGIVDVFTNQADLSGISGVPELK</b>        | Just<br>chicken | E1BS56,                                 |
| <b>TLSGGMVIHETPSVQVTK</b>             | Just<br>chicken | F1P2F0,P15989,                          |
| <b>GGTQMTALGIDTAR</b>                 | Just<br>chicken | Q90615,O42094,F1N8Z0,F1NJQ6,E1C0V6<br>, |
| <b>CWSSTAASAPEMCPIR</b>               | Just<br>chicken | F1NKB2,Q9DDR6,F1NII7,F1NJQ9,            |
| <b>SPPVSAVSINR</b>                    | Just<br>chicken | F1NIU3,B3VE14,                          |
| <b>GKDSAVIVTQK</b>                    | Just<br>chicken | F1NEQ6,                                 |

|                                                   |                 |                              |
|---------------------------------------------------|-----------------|------------------------------|
| <b>GAILSTLQAVQNYLK</b>                            | Just<br>chicken | F1NV02,Q197X2,               |
| <b>FGSCQQGVAATFTR</b>                             | Just<br>chicken | P26007,F1P0M0,F1P0B0,        |
| <b>SNIEEVLLALK</b>                                | Just<br>chicken | F1P350,P87498,E1BY96,        |
| <b>DRTPLTSLCEVTPVVSIGDIFR</b>                     | Just<br>chicken | F1NFE0,P20785,F1NBG1,        |
| <b>EECYVTGWGDTK</b>                               | Just<br>chicken | F1NWX6,                      |
| <b>FNQMLNQIPNDYYSNR</b>                           | Just<br>chicken | P13944,F1NKN1,F1NM33,F1NX22, |
| <b>SLVEHLQLLK</b>                                 | Just<br>chicken | F1NTM6,F1NWR2,Q90997<br>,    |
| <b>ISEVTLTGQIR</b>                                | Just<br>chicken | F1NV02,Q197X2,               |
| <b>VPVDPATYGQFYGGDSYIILYDYR</b>                   | Just<br>chicken | F1NKF3,O93510,               |
| <b>KSLWDILK</b>                                   | Just<br>chicken | F1NV02,Q197X2,               |
| <b>IGNVEDPASSPFR</b>                              | Just<br>chicken | E1C7P4,                      |
| <b>FLVNAAAALSQDVK</b>                             | Just<br>chicken | F1N8P9,F1NM47,               |
| <b>FAVVITDGHVTGSPCGGMK</b>                        | Just<br>chicken | P15988,                      |
| <b>AELLEPLK</b>                                   | Just<br>chicken | F1NV02,Q197X2,               |
| <b>LSSDATHQPEDATAQEEDSVPQE<br/>VMLNKPFLAVFEAK</b> | Just<br>chicken | F1NDH2,                      |
| <b>TFAQGLAVAR</b>                                 | Just<br>chicken | F1NAU1,                      |

|                                  |                 |                                            |
|----------------------------------|-----------------|--------------------------------------------|
| <b>VLNAIGEAVK</b>                | Just<br>chicken | P02007,                                    |
| <b>HGTDDGIVWMNWK</b>             | Just<br>chicken | F1NUL9,F1P5F9,Q02020,                      |
| <b>ITYYQLNFQTNIMVPAHIFR</b>      | Just<br>chicken | F1NWN4,                                    |
| <b>AAPGSLCSVQSVDK</b>            | Just<br>chicken | F1NEQ4,                                    |
| <b>PLLESTEYIISCQPVSQDEDTLQFR</b> | Just<br>chicken | F1NJT3,F1NJT4,P11722,                      |
| <b>HLTNPINPAVCHCCSSSYALR</b>     | Just<br>chicken | E1C1G2,E1BV96,P84407,                      |
| <b>YSAVATLEDSGEYLCK</b>          | Just<br>chicken | F1NMM7,E1C340,F1NZJ5,                      |
| <b>IIDATSSGPKEEK</b>             | Just<br>chicken | E1BYN5,E1BZD1,                             |
| <b>EHLMMALADLDEILIR</b>          | Just<br>chicken | Q6KDZ1,                                    |
| <b>VYSVAEQHESAPLSGIQK</b>        | Just<br>chicken | F1NJT3,F1NJT4,P11722,                      |
| <b>ALVQYSPNIIFAGIEDIQK</b>       | Just<br>chicken | O42094,F1N8Z0,E1C0V6,                      |
| <b>DCSACEPGFFNLQSGR</b>          | Just<br>chicken | F1NI05,F1NK49,Q90ZN3,                      |
| <b>SAGWNIPIGTLIHR</b>            | Just<br>chicken | Q4ADG4,E1BQC2,Q4ADJ6,E1BS66,Q4ADJ7,F1NL17, |
| <b>VGATGEIFVVNSPR</b>            | Just<br>chicken | P02845,Q6BCB8,F1NV01,F1NFL6,E1BYN6<br>,    |
| <b>LRIPQVSAADSGEYVCR</b>         | Just<br>chicken | Q6KDZ1,                                    |
| <b>ELENTYENNQK</b>               | Just<br>chicken | F1NJ23,                                    |

|                              |                 |                                                   |
|------------------------------|-----------------|---------------------------------------------------|
| <b>TIQSLEIDLQSQLSTK</b>      | Just<br>chicken | Q6PVZ1,F1NPR7,F1NDP0,                             |
| <b>APDTQLQNQGSLR</b>         | Just<br>chicken | E1BYN5,E1BZD1,                                    |
| <b>HIVSQFIVATNTWLQK</b>      | Just<br>chicken | F1NV02,Q197X2,                                    |
| <b>YHPEEDGDPNSIHANPR</b>     | Just<br>chicken | F1NWN4,                                           |
| <b>EILNMAQYQPSR</b>          | Just<br>chicken | F1NV02,Q197X2,                                    |
| <b>LDLSNSGASLSR</b>          | Just<br>chicken | E1BXK1,                                           |
| <b>NVDNLSQAMAELSNLHAYNLR</b> | Just<br>chicken | P02001,E1C4M2,                                    |
| <b>EVQGHESTFLGYFK</b>        | Just<br>chicken | F1NKF3,O93510,                                    |
| <b>SVYTMSSSYNEK</b>          | Just<br>chicken | F1NV02,Q197X2,                                    |
| <b>LKEIVTNFLSTFEA</b>        | Just<br>chicken | F1NI22,F1NGA2,                                    |
| <b>GTPGDGPQGIIGSR</b>        | Just<br>chicken | F1NI72,                                           |
| <b>TNEGILTLVK</b>            | Just<br>chicken | F1NJD5,                                           |
| <b>SGEYWIDPNQGCK</b>         | Just<br>chicken | P12105,F1NI73,                                    |
| <b>QQMGTELPAFLEK</b>         | Just<br>chicken | Q9W6F5,F1NVF3,                                    |
| <b>TDERPASYFAVAVAR</b>       | Just<br>chicken | Q4ADG4,E1BQC2,Q4ADJ6,P02789,E1BS66,Q4ADJ7,F1NL17, |
| <b>RHPEFSIQLIMR</b>          | Just<br>chicken | P19121,F2Z4L6,                                    |



|                              |                 |                       |
|------------------------------|-----------------|-----------------------|
| <b>YNPTNAILFFGR</b>          | Just<br>chicken | P01014,F1NJA4,        |
| <b>LENAIATQTDYCR</b>         | Just<br>chicken | F1NUL9,F1P5F9,Q02020, |
| <b>LVEITTAQR</b>             | Just<br>chicken | E1BX43,               |
| <b>GDEPADPALEIFK</b>         | Just<br>chicken | O42390,F1P494,        |
| <b>VAFQCPIPR</b>             | Just<br>chicken | E1BRP7,Q6B0K7,E1BT59, |
| <b>RGSLQYQFGSELLQLPVHLFK</b> | Just<br>chicken | F1P350,P87498,E1BY96, |
| <b>TFGTASLDIQWPK</b>         | Just<br>chicken | P26007,F1P0M0,F1P0B0, |
| <b>FLPGYAAGASELPLK</b>       | Just<br>chicken | F1P350,P87498,E1BY96, |
| <b>AYTAISGVPAPAAR</b>        | Just<br>chicken | F1NDL4,               |
| <b>DSYGAMADCCSK</b>          | Just<br>chicken | P19121,F2Z4L6,        |
| <b>YLAEDPETGNSEGICYK</b>     | Just<br>chicken | F1NJD7,               |
| <b>FEVTTSMPR</b>             | Just<br>chicken | F1NEW8,               |
| <b>GNSCEDTVMQDTSSTGGR</b>    | Just<br>chicken | F1N9I4,               |
| <b>WCGTTENYDADQK</b>         | Just<br>chicken | F1NJT3,               |
| <b>ALLAYAFALAGK</b>          | Just<br>chicken | E1C544,               |
| <b>LVDGPNQCAGR</b>           | Just<br>chicken | Q98TD1,               |

|                                       |                 |                                                   |
|---------------------------------------|-----------------|---------------------------------------------------|
| <b>GSNSAELSGAQELLK</b>                | Just<br>chicken | F1NKF3,O93510,                                    |
| <b>VMELSSAAQEK</b>                    | Just<br>chicken | F1NV02,F1NRG6,Q197X2,P11682,                      |
| <b>NLQMDDFELLCTDGR</b>                | Just<br>chicken | Q4ADG4,E1BQC2,Q4ADJ6,P02789,E1BS66,Q4ADJ7,F1NL17, |
| <b>KVCLLSYASLCHK</b>                  | Just<br>chicken | F1P350,P87498,E1BY96,                             |
| <b>NFVVNVVSR</b>                      | Just<br>chicken | P15988,                                           |
| <b>NLEASMMTNAK</b>                    | Just<br>chicken | F1NV02,F1NRG7,                                    |
| <b>TPLTSLCEVTPVVSIGDIFR</b>           | Just<br>chicken | F1NFE0,P20785,F1NBG1,                             |
| <b>GLGTDEDTLIEICSR</b>                | Just<br>chicken | P17785,                                           |
| <b>KGTADYAVFK</b>                     | Just<br>chicken | F1NSM9,E1BV78,O93568,                             |
| <b>VPHVTMADSGEYVCR</b>                | Just<br>chicken | Q6KDZ1,                                           |
| <b>ELDDATETADAMNR</b>                 | Just<br>chicken | F1NCD4,P14105,                                    |
| <b>KATYSGVSLFSNPVQYWEIQPSA<br/>FR</b> | Just<br>chicken | E1BQ80,P28675,E1BRE9,                             |
| <b>EYTVTEPERDGVASTYTGAYQWR</b>        | Just<br>chicken | F1NP23,                                           |
| <b>ELLPNIVGVAQR</b>                   | Just<br>chicken | F1P2F0,P15989,                                    |
| <b>TGTNFFGYSIAGNMMLDK</b>             | Just<br>chicken | P26007,F1POM0,F1POB0,                             |
| <b>SEDNIGNLIEYFR</b>                  | Just<br>chicken | P26007,F1POM0,F1POB0,                             |

|                                |                 |                              |
|--------------------------------|-----------------|------------------------------|
| <b>VTIMWTPPQSQVSGYR</b>        | Just<br>chicken | F1NJT3,                      |
| <b>VYGLHEER</b>                | Just<br>chicken | F1NWX6,                      |
| <b>ASLNIYIR</b>                | Just<br>chicken | F1NX21,F1NX20,               |
| <b>SDLLDAIK</b>                | Just<br>chicken | P13944,F1NKN1,F1NM33,F1NX22, |
| <b>LTGLNLWDR</b>               | Just<br>chicken | Q5UMH8,F1NYP7,               |
| <b>MPPGVPSAIHQFLDR</b>         | Just<br>chicken | E1C7T4,                      |
| <b>GVFYQTVSR</b>               | Just<br>chicken | F1NFE0,P20785,F1NBG1,        |
| <b>VTDNMFCAGYSPEDSK</b>        | Just<br>chicken | F1NXV6,Q91001,               |
| <b>YEVSVYALKDSLTSR</b>         | Just<br>chicken | F1NJT3,F1NJT4,P11722,        |
| <b>TFVPASIESQTPAYEEDVKDEVR</b> | Just<br>chicken | F1NDH2,                      |
| <b>LEWIAGGTWTPSALQFAYNK</b>    | Just<br>chicken | P15988,                      |
| <b>FIDKLTER</b>                | Just<br>chicken | F1NFE0,P20785,F1NBG1,        |
| <b>FFSASCVPGATIEQK</b>         | Just<br>chicken | Q4ADG4,Q4ADJ6,P02789,Q4ADJ7, |
| <b>HTYAITYADLTANFK</b>         | Just<br>chicken | F1NV02,Q197X2,               |
| <b>GSPEFEALCPR</b>             | Just<br>chicken | F1NJR3,P87363,F1NII7,F1NJQ9, |
| <b>VLEKLENLIFLYMEK</b>         | Just<br>chicken | E1C7T4,                      |

|                            |                 |                                                   |
|----------------------------|-----------------|---------------------------------------------------|
| <b>INEQVPQVLVLVTAGR</b>    | Just<br>chicken | F1P2F0,P15989,                                    |
| <b>EDSSSDVLQLASDYIK</b>    | Just<br>chicken | F1NP23,                                           |
| <b>ISSQGQYELR</b>          | Just<br>chicken | F1N8F5,P10039,Q90995,F1N8F4,Q90994,F1N8F6,Q90824, |
| <b>TIHHPFSVEEYVLPK</b>     | Just<br>chicken | E1C544,                                           |
| <b>LPLQSSAWLENLSPR</b>     | Just<br>chicken | F1NDH2,                                           |
| <b>RQQMGTELPAFLEK</b>      | Just<br>chicken | Q9W6F5,F1NVF3,                                    |
| <b>ESDQGAYTCEAINTR</b>     | Just<br>chicken | Q6KDZ1,                                           |
| <b>HKVELDFSSK</b>          | Just<br>chicken | F1NEQ4,                                           |
| <b>IGNIYAPEDCPDLCVNIVR</b> | Just<br>chicken | P02845,Q6BCB8,F1NV01,F1NFL6,E1BYN6                |
| <b>VEGLADVIMK</b>          | Just<br>chicken | ,<br>P02845,Q6BCB8,F1NV01,F1NFL6,E1BYN6           |
| <b>FEDSQDQVFSTQFEVK</b>    | Just<br>chicken | ,<br>Q90633,                                      |
| <b>GEVQTVTFDNDEVKK</b>     | Just<br>chicken | P13944,F1NKN1,F1NM33,F1NX22,                      |
| <b>KVLSSFGEAVK</b>         | Just<br>chicken | F1NMZ3,E1C3W0,P02127,P02128,F1N9X2,Q90864,        |
| <b>AGVLTFAVGVR</b>         | Just<br>chicken | F1P2F0,P15989,                                    |
| <b>VLGATVDNANLLLQIDNAR</b> | Just<br>chicken | F1NPR7,                                           |
| <b>GSAPDVPMQNYGSLR</b>     | Just<br>chicken | ,<br>P02845,Q6BCB8,F1NV01,F1NFL6,E1BYN6           |

|                              |                 |                              |
|------------------------------|-----------------|------------------------------|
| <b>MEEALDNYVIR</b>           | Just<br>chicken | E1BR16,F1P0M2,               |
| <b>ILQYGQMSVIVER</b>         | Just<br>chicken | F1NZZ2,                      |
| <b>NAPYSGYSGAFHCLK</b>       | Just<br>chicken | Q4ADG4,Q4ADJ6,P02789,Q4ADJ7, |
| <b>VVAALIEAANHIDDIAGTLSK</b> | Just<br>chicken | G1K311,F1NEY9,P01994,        |
| <b>LLGSVALECIK</b>           | Just<br>chicken | F1NV02,Q197X2,               |
| <b>SVSYFTYLILSK</b>          | Just<br>chicken | Q90633,                      |
| <b>VDATEEAELAQQFGVR</b>      | Just<br>chicken | P09102,                      |
| <b>NLNTLCINQPDQALR</b>       | Just<br>chicken | P30374,                      |
| <b>DIVFLIDGSTALGTGPFNSIR</b> | Just<br>chicken | F1P2F0,P15989,               |
| <b>LGPDGTQVGLATYSYR</b>      | Just<br>chicken | F1NBA6,                      |
| <b>VPDYTSLLR</b>             | Just<br>chicken | F1NFE0,P20785,F1NBG1,        |
| <b>SEHGNEGDVGVLTCK</b>       | Just<br>chicken | F1NMG0,F1NL31,P17790,        |
| <b>QAQTASVPQATPAQGK</b>      | Just<br>chicken | F1NJT3,                      |
| <b>VNFVCQNTEGSFYCESK</b>     | Just<br>chicken | F1NWN4,                      |
| <b>ALIQQGVEQGTR</b>          | Just<br>chicken | F1NRG6,Q197X2,P11682,        |
| <b>GLGELLELSLHSNALR</b>      | Just<br>chicken | F1N822,                      |

|                                             |                 |                                                   |
|---------------------------------------------|-----------------|---------------------------------------------------|
| <b>ITLIFESSEIR</b>                          | Just<br>chicken | Q98UI9,F1NZY2,                                    |
| <b>VIGSGCNLD TAR</b>                        | Just<br>chicken | P00337,                                           |
| <b>GTPLDTGIALER</b>                         | Just<br>chicken | Q8JHF6,                                           |
| <b>KLAHHQVIER</b>                           | Just<br>chicken | E1C544,                                           |
| <b>VFSVAISPHHLDQR</b>                       | Just<br>chicken | F1NFE0,P20785,F1N BG1,                            |
| <b>STSGLYLGT CER</b>                        | Just<br>chicken | Q6KDZ1,                                           |
| <b>RHTNVPDVFLGK</b>                         | Just<br>chicken | Q9W6F5,F1NVF3,                                    |
| <b>VDAYGGALSYGVR</b>                        | Just<br>chicken | Q6KDZ1,                                           |
| <b>GKPTGPLLVATFWPDLPEK</b>                  | Just<br>chicken | Q90611,                                           |
| <b>LPTGLPHSLLMLYFDNNQISNIPD<br/>EYFQGFK</b> | Just<br>chicken | P51890,                                           |
| <b>IASIGINDFCPLGYNTK</b>                    | Just<br>chicken | E1BQ80,P28675,E1BRE9,                             |
| <b>MEEGVLPMLVLITGGK</b>                     | Just<br>chicken | F1P2F0,P15989,                                    |
| <b>FFDNFGNLSSPTAIIGNPK</b>                  | Just<br>chicken | E1C3W0,P02127,                                    |
| <b>LGESADLTAISVR</b>                        | Just<br>chicken | E1BYN5,E1BZD1,                                    |
| <b>TGECTAQVHMNNAEK</b>                      | Just<br>chicken | E1BX43,                                           |
| <b>VSQTDNSITLEWK</b>                        | Just<br>chicken | F1N8F5,P10039,Q90995,F1N8F4,Q90994,F1N8F6,Q90824, |

|                                             |                 |                                                   |
|---------------------------------------------|-----------------|---------------------------------------------------|
| <b>FGYNPLEFEGFSWR</b>                       | Just<br>chicken | F1NZZ2,                                           |
| <b>ATLTVQALPR</b>                           | Just<br>chicken | F1NAT6,Q6KDZ1,                                    |
| <b>AMDFDRDILSALAEVEQLSR</b>                 | Just<br>chicken | F1NJ23,                                           |
| <b>GGLEPINFQTAADQAR</b>                     | Just<br>chicken | P01012,                                           |
| <b>IGTTYAVNADSVFELLSYNMK</b>                | Just<br>chicken | F1NV02,Q197X2,                                    |
| <b>EILAVDCSQTDPVQSQLR</b>                   | Just<br>chicken | F1NGP2,Q9YGP0,F1N8Q8,                             |
| <b>LGGIVLPNDGK</b>                          | Just<br>chicken | F1N8N7,P07228,                                    |
| <b>RVPSLMDSQLYLGFYYSIQSM<br/>R</b>          | Just<br>chicken | Q4ADG4,E1BQC2,Q4ADJ6,P02789,E1BS66,Q4ADJ7,F1NL17, |
| <b>QLQSLTAQMER</b>                          | Just<br>chicken | O93601,                                           |
| <b>VNDEIIVSWVNETLTAAGK</b>                  | Just<br>chicken | Q5ZLW0,                                           |
| <b>GFSGLQGPPGPPGAPGEQGPPSG<br/>ASGPAGPR</b> | Just<br>chicken | P02457,                                           |
| <b>GNWEKPFKPENTEER</b>                      | Just<br>chicken | E1BS56,                                           |
| <b>ILGQEVAFININK</b>                        | Just<br>chicken | P02845,Q6BCB8,F1NV01,F1NFL6,E1BYN6<br>,           |
| <b>GPPGPMGPPGLAGPPGEAGR</b>                 | Just<br>chicken | P02457,                                           |
| <b>ISASPLLYMLLGSIMK</b>                     | Just<br>chicken | F1NTM6,F1NWR2,Q90997<br>,                         |
| <b>TAEVTKEQLEFEAQLR</b>                     | Just<br>chicken | Q8JIG5,F1P2P7,A7UEB0,                             |

|                                  |         |                                    |
|----------------------------------|---------|------------------------------------|
| <b>YHQATNTNVNCPICFMPLDVQ</b>     | Just    | F1NJT3,                            |
| <b>ADTQHPR</b>                   | chicken |                                    |
| <b>HSIGSSTSSHVTVGAGSSHLGTGGK</b> | Just    | F1P4V1,P14448,                     |
| <b>DK</b>                        | chicken |                                    |
| <b>ELLQQVMK</b>                  | Just    | P02845,Q6BCB8,F1NV01,F1NFL6,E1BYN6 |
|                                  | chicken | ,                                  |
| <b>CIGNMGEPASLKR</b>             | Just    | P02845,Q6BCB8,F1NV01,F1NFL6,E1BYN6 |
|                                  | chicken | ,                                  |
| <b>VDGPILIFFADYR</b>             | Just    | F1NV02,Q197X2,                     |
|                                  | chicken |                                    |
| <b>TVIVEAPIHGLK</b>              | Just    | F1P350,P87498,E1BY96,              |
|                                  | chicken |                                    |
| <b>VMMTLQWPYK</b>                | Just    | F1NGX1,F1NWS1,P26008,              |
|                                  | chicken |                                    |
| <b>VVESLDIGR</b>                 | Just    | F1P2F0,P15989,                     |
|                                  | chicken |                                    |
| <b>GLTGSSGPPGPR</b>              | Just    | P13944,F1NKN1,F1NM33,F1NX22,       |
|                                  | chicken |                                    |
| <b>ENEINLGEIMSSMK</b>            | Just    | P12105,F1NI73,F1NI72,              |
|                                  | chicken |                                    |
| <b>NNLCIENACIAAHDKR</b>          | Just    | O42390,F1P494,                     |
|                                  | chicken |                                    |
| <b>ALQNSIQEQVEMK</b>             | Just    | F1P4V1,P14448,                     |
|                                  | chicken |                                    |
| <b>EPVGTCTYLDGSK</b>             | Just    | F1NGX1,F1NWS1,P26008,              |
|                                  | chicken |                                    |
| <b>GPYFLTAETLK</b>               | Just    | F1P2F0,P15989,                     |
|                                  | chicken |                                    |
| <b>IFDALNYLPNLLLGVEAVGR</b>      | Just    | Q8JHF6,                            |
|                                  | chicken |                                    |
| <b>LAGATLSLASR</b>               | Just    | F1NAR5,                            |
|                                  | chicken |                                    |



|                             |                 |                                         |
|-----------------------------|-----------------|-----------------------------------------|
| <b>QTEVTLGNNEK</b>          | Just<br>chicken | F1NP23,                                 |
| <b>VTQSEIPR</b>             | Just<br>chicken | E1C117,                                 |
| <b>HSQTTEEPQCPFGTR</b>      | Just<br>chicken | Q9I9K3,F1P2R3,F1NA18,                   |
| <b>SAAELGDCNEELEQA EK</b>   | Just<br>chicken | Q9W770,F1P046,F1NG26,                   |
| <b>AIGNAGEPASIK</b>         | Just<br>chicken | E1BYN5,E1BZD1,                          |
| <b>AANEENYESVWK</b>         | Just<br>chicken | F1P350,P87498,E1BY96,                   |
| <b>HIQLLDQKPSESK</b>        | Just<br>chicken | E1C6L8,Q98922,Q90880,Q90989,Q98921<br>, |
| <b>VPEGQSYFVDFGSTECS PK</b> | Just<br>chicken | F1NWN4,                                 |
| <b>GEVQTVTFDNDEVK</b>       | Just<br>chicken | P13944,F1NKN1,F1NM33,F1NX22,            |
| <b>LTPVAQELKELTK</b>        | Just<br>chicken | F1N8F3,P08250,                          |
| <b>TDESDASSYISY TIEGK</b>   | Just<br>chicken | F1NMG0,F1NL31,P17790,                   |
| <b>AGGFGSSSLYNLGSANK</b>    | Just<br>chicken | O93532,                                 |
| <b>EVVCTSCQTGTTGK</b>       | Just<br>chicken | F1NI05,F1NK49,Q90ZN3,                   |
| <b>STDLSGAFGTIR</b>         | Just<br>chicken | F1NLU4,                                 |
| <b>FSYLTMLAQK</b>           | Just<br>chicken | Q9W6F5,F1NVF3,                          |
| <b>VNASATSIVLK</b>          | Just<br>chicken | P13944,F1NKN1,F1NM33,F1NX22,            |

|                                |                 |                       |
|--------------------------------|-----------------|-----------------------|
| <b>HEIDLNEIK</b>               | Just<br>chicken | Q6QAZ9,F1N9S7,        |
| <b>LSFAVASR</b>                | Just<br>chicken | Q8JG64,               |
| <b>VLGALGNAVK</b>              | Just<br>chicken | P02001,E1C4M2,        |
| <b>FSESTTVFTGQCFIDR</b>        | Just<br>chicken | P56734,P02701,        |
| <b>KLECTFPDGAGR</b>            | Just<br>chicken | F1NDL4,               |
| <b>LAEIEEMAPFSPK</b>           | Just<br>chicken | F1NLV8,Q91048,        |
| <b>KSEHGNEGDVGVLTCK</b>        | Just<br>chicken | F1NMG0,F1NL31,P17790, |
| <b>GQETAFYVLK</b>              | Just<br>chicken | F1NAT6,Q6KDZ1,        |
| <b>VTEQESKPVQMMYQIGLFR</b>     | Just<br>chicken | P01012,               |
| <b>GGGADSAQVFTDVGLAFLSDTIK</b> | Just<br>chicken | F1P587,               |
| <b>DDHAICTTEYSR</b>            | Just<br>chicken | F1NZZ2,               |
| <b>VIIGVAYDCMDK</b>            | Just<br>chicken | F1NP23,Q9I9K4,F1NC71, |
| <b>LDCIGETVLVK</b>             | Just<br>chicken | Q98UI9,F1NZY2,        |
| <b>VPQIAFIITGGK</b>            | Just<br>chicken | F1P2F0,P15989,        |
| <b>FAVQAEGVK</b>               | Just<br>chicken | F1NV02,Q197X2,        |

**Supplementary table S5.** This table shows the non-redundant list of 2,470 unique peptides and matches to either human and/or chicken Swissprot/Trembl protein sequences.
